# Supplementary material for: Systematic meta-analyses, field synopsis and global assessment of the evidence of genetic association studies in colorectal cancer
Source: PubMed Central journal article supplement (PMC7398467; doi:10.1136/gutjnl-2019-319313), 2019-12-09
Supplement: gutjnl-2019-319313supp002.pdf [file gutjnl-2019-319313supp002.pdf]

Supplementary Table S1. List of genes and variants that were selected for meta-analysis (sorted by gene pathway).

| Gene                        | Variant             | rs number  | Cases vs. controls<br>(number of samples) | Ref allele   | Ref allele freq<br>cases | Ref allele freq<br>controls |
|-----------------------------|---------------------|------------|-------------------------------------------|--------------|--------------------------|-----------------------------|
| <b>Adhesion molecules</b>   |                     |            |                                           |              |                          |                             |
| CDH1                        | C-160A              | rs16260    | 7261 vs. 7230(10)                         | C            | 0.73                     | 0.73                        |
| CDH1                        |                     | rs1862748  | 17436 vs. 18418(11)                       | C            | 0.71                     | 0.69                        |
| MMP1                        | G-1607GG            | rs1799750  | 1660 vs. 2024(10)                         | G            | 0.63                     | 0.60                        |
| MMP3                        | AAAAA-1612AAAAA     | rs3025058  | 1212 vs. 1631(8)                          | 5A           | 0.66                     | 0.66                        |
| MMP2                        | C-1306T             | rs243865   | 1215 vs. 1347 (8)                         | C            | 0.80                     | 0.82                        |
| MMP7                        | 181A/Gæ             | rs11568818 | 2139 vs. 2355 (9*)                        | A            | 0.65                     | 0.66                        |
| MMP9                        | R279Q               | rs17576    | 1520 vs. 1753 (4*)                        | A            | 0.67                     | 0.64                        |
| MMP9                        | 1562C/T             | rs3918242  | 621 vs. 904 (5)                           | C            | 0.89                     | 0.87                        |
| CX3CR1                      | V249I               | rs3732379  | 3548 vs. 3649(3*)                         | C            | 0.72                     | 0.72                        |
| CX3CR1                      | T280M               | rs3732378  | 6110 vs. 6335(4*)                         | G            | 0.83                     | 0.83                        |
| DLG5                        | R30Q                | rs1248696  | 3672 vs. 3618(3*)                         | C            | 0.90                     | 0.89                        |
| ICAM1                       | R241G               | rs1799969  | 3275 vs. 3368(3*)                         | G            | 0.88                     | 0.89                        |
| ICAM1                       | K469E               | rs5498     | 6391 vs. 6611(6*)                         | A            | 0.59                     | 0.58                        |
| AXIN2                       | P50S                | rs2240308  | 4723 vs. 4932 (4*)                        | G            | 0.51                     | 0.52                        |
| <b>Alcohol metabolism</b>   |                     |            |                                           |              |                          |                             |
| ADH1B                       | Arg47His            | rs1229984  | 4449 vs. 6995(9)                          | His          | 0.80                     | 0.81                        |
| ADH1C                       | Ile349Val (1045A>G) | rs698      | 4545 vs. 18180(9**)                       | Ile (A)      | 0.67                     | 0.62                        |
| ALDH2                       | Glu487Lys           | rs671      | 5561 vs. 8415(14)                         | Glu (G)      | 0.87                     | 0.84                        |
| ALDH2                       | 355G>A              | rs886205   | 2595 vs. 2993 (4*)                        | G            | 0.84                     | 0.85                        |
| <b>Angiogenesis</b>         |                     |            |                                           |              |                          |                             |
| VEGF                        | 936 C>T             | rs3025039  | 3090 vs. 3147(11)                         | C            | 0.80                     | 0.81                        |
| VEGF                        | G634C               | rs2010963  | 2426 vs. 2387(7)                          | C            | 0.62                     | 0.60                        |
| VEGF                        | 460C>T              | rs833061   | 989 vs. 897 (4)                           | T            | 0.56                     | 0.59                        |
| VEGF                        | 1154G>A             | rs1570360  | 1150 vs. 1342 (4)                         | G            | 0.72                     | 0.72                        |
| VEGF                        | 2578C>A             | rs699947   | 4497 vs. 5334 (10*)                       | C            | 0.55                     | 0.56                        |
| ACE                         | I/D                 | x          | 649 vs. 6556 (4)                          | del          | 0.52                     | 0.53                        |
| <b>Base-excision repair</b> |                     |            |                                           |              |                          |                             |
| MGMT                        | Leu84Phe            | rs12917    | 8296 vs. 11815(9*)                        | C            | 0.86                     | 0.87                        |
| MGMT                        | I13143Val           | rs2308321  | 2863 vs. 8040(6)                          | A            | 0.88                     | 0.88                        |
| MUTYH                       | G396D               | rs36053993 | 28302 vs. 20935(19*)                      | G            | 0.99                     | 0.99                        |
| MUTYH                       | Y179C               | rs34612342 | 28180 vs. 20923(19*)                      | A            | 1.00                     | 1.00                        |
| MUTYH                       | V22M                | rs3219484  | 16671 vs. 14985 (13*)                     | G            | 0.93                     | 0.93                        |
| MUTYH                       | G972C               | rs3219489  | 17936 vs. 19154 (20)                      | G            | 0.74                     | 0.75                        |
| OGG1                        | Ser326Cys           | rs1052133  | 8090 vs. 10486 (21)                       | C            | 0.69                     | 0.67                        |
| XRCC1                       | Arg194Trp           | rs1799782  | 7643 vs. 11883(25)                        | C            | 0.81                     | 0.82                        |
| XRCC1                       | Arg280His           | rs25489    | 6510 vs. 7889(10)                         | G            | 0.94                     | 0.93                        |
| XRCC1                       | Arg399Gln           | rs25487    | 13017 vs. 18166(37)                       | G            | 0.67                     | 0.68                        |
| XRCC2                       | Arg188His           | rs3218536  | 5977 vs. 6174 (4*)                        | G            | 0.91                     | 0.92                        |
| XRCC3                       | Thr241Met           | rs861539   | 7995 vs. 9886(21)                         | T            | 0.70                     | 0.70                        |
| ERCC1                       | Asn118Asn           | rs11615    | 4231 vs. 4928(7*)                         | T            | 0.62                     | 0.62                        |
| ERCC1                       | 8092C>A             | rs3212986  | 1815 vs. 1858(4*)                         | C            | 0.73                     | 0.75                        |
| ERCC2                       | D312N               | rs1799793  | 6722 vs. 9585(11)                         | G            | 0.65                     | 0.67                        |
| ERCC2                       | Lys751Gln           | rs13181    | 10239 vs. 13833(24*)                      | A            | 0.67                     | 0.68                        |
| ERCC4                       | Arg415Gln           | rs1800067  | 6896 vs. 7431(8*)                         | G            | 0.93                     | 0.92                        |
| ERCC5                       | D1104H              | rs17655    | 9653 vs. 11367(14)                        | G            | 0.70                     | 0.72                        |
| APE1                        | Glu51His            | rs1048945  | 3224 vs. 3369 (3)                         | G            | 0.96                     | 0.96                        |
| APE1                        | Asp148G1            | rs1130409  | 5786 vs. 6550 (11)                        | T            | 0.54                     | 0.55                        |
| XPA                         |                     | rs1800975  | 2308 vs. 2871(6**)                        | G            | 0.67                     | 0.66                        |
| CHEK2                       | c.470T>C            | rs1787996  | 1687 vs. 3370 (3)                         | T            | 0.97                     | 0.98                        |
| CHEK2                       | 1100delC            | x          | 2417 vs. 3615 (4)                         | non-carriers | 0.99                     | 0.99                        |
| EXO1                        | T439M               | rs4149963  | 6597 vs. 6842(5*)                         | C            | 0.92                     | 0.92                        |
| EXO1                        | P757L               | rs9350     | 5459 vs. 5926(4*)                         | C            | 0.83                     | 0.83                        |
| MSH2                        | IVS12-6T>C          | rs2303428  | 4371 vs. 4590(5)                          | T            | 0.90                     | 0.89                        |
| MSH2                        | 118T>C              | rs2303425  | 1775 vs. 2206(3)                          | T            | 0.87                     | 0.87                        |
| MSH2                        | Gly322Asp           | rs4987188  | 3719 vs. 3852(6)                          | G            | 0.98                     | 0.98                        |
| MSH2                        |                     | rs1981929  | 4319 vs. 4009(3*)                         | A            | 0.60                     | 0.60                        |
| MSH2                        |                     | rs4608577  | 4308 vs. 4011(3*)                         | T            | 0.83                     | 0.82                        |
| MSH2                        |                     | rs4952887  | 4321 vs. 4011(3*)                         | C            | 0.91                     | 0.91                        |
| MSH3                        | Q949R               | rs184967   | 8151 vs. 10103(4*)                        | G            | 0.84                     | 0.85                        |
| MSH3                        | A1036T              | rs26779    | 6050 vs. 8024(6*)                         | C            | 0.67                     | 0.69                        |
| MSH6                        | G39E                | rs1042821  | 4936 vs. 8223(6)                          | G            | 0.82                     | 0.83                        |
| MSH6                        | 276A>G (P92P)       | rs1800932  | 12214 vs. 10598(9)                        | A            | 0.82                     | 0.82                        |
| MSH6                        | 540T>C (D180D)      | rs1800935  | 14234 vs. 12089(11*)                      | T            | 0.71                     | 0.70                        |
| MSH6                        |                     | rs1800936  | 3867 vs. 4019(3*)                         | C            | 0.85                     | 0.87                        |
| MSH6                        |                     | rs3136245  | 4314 vs. 4013(3*)                         | C            | 0.80                     | 0.79                        |
| MSH6                        |                     | rs3136329  | 4305 vs. 3996(3*)                         | T            | 0.58                     | 0.58                        |
| MSH6                        |                     | rs6713506  | 4306 vs. 3995(3*)                         | G            | 0.84                     | 0.84                        |
| NBS1                        | 185G>C              | rs1805794  | 3948 vs. 4316(5)                          | C            | 0.65                     | 0.64                        |
| WRN                         | V114I               | rs2230009  | 7662 vs. 7908(4*)                         | G            | 0.94                     | 0.94                        |
| WRN                         | L1074F              | rs2725362  | 4681 vs. 4833(3)                          | G            | 0.56                     | 0.55                        |
| WRN                         | C1367R              | rs1346044  | 8548 vs. 8816(5*)                         | T            | 0.75                     | 0.75                        |
| XPC                         | Ala499Val           | rs2228000  | 2677 vs. 4253(6)                          | G            | 0.70                     | 0.68                        |
| XPC                         | Lys939Gln           | rs2228001  | 7650 vs. 9769(13*)                        | T            | 0.60                     | 0.62                        |

|                                                |                |            |                        |         |      |      |
|------------------------------------------------|----------------|------------|------------------------|---------|------|------|
| PMS2                                           |                | rs6463524  | 3713 vs. 3374(3)       | C       | 0.82 | 0.81 |
| PMS2                                           |                | rs2286680  | 4320 vs. 4010(3*)      | C       | 0.86 | 0.86 |
| PMS2                                           |                | rs235060   | 4315 vs. 4006(3*)      | T       | 0.76 | 0.75 |
| RAD18                                          | 905G>A         | rs373572   | 6560 vs. 6906(5*)      | G       | 0.70 | 0.71 |
| RAD51                                          | G135C          | rs1801320  | 853 vs. 840(5)         | G       | 0.59 | 0.67 |
| ATM                                            | D1853N         | rs1801516  | 3477 vs. 6951 (3*)     | G       | 0.86 | 0.84 |
| <b>Inflammation/immune response</b>            |                |            |                        |         |      |      |
| IL6                                            | 174G>C         | rs1800795  | 7858 vs. 9345(13§**)   | G       | 0.61 | 0.60 |
| IL8                                            | 251T/A         | rs4073     | 6060 vs. 7435(12**)    | T       | 0.54 | 0.54 |
| IL10                                           | 1082G/A        | rs1800896  | 4510 vs. 5363(9*)      | A       | 0.50 | 0.50 |
| IL1B                                           | T31C           | rs1143627  | 1251 vs. 2124 (5)      | G       | 0.65 | 0.66 |
| IL1B                                           | 511 C>T        | rs16944    | 577 vs. 828 (3)        | A       | 0.65 | 0.64 |
| IL4                                            | C590T          | rs2057768  | 1123 vs. 1483 (5)      | C       | 0.82 | 0.80 |
| IL4R                                           | R431C          | rs1805012  | 3801 vs. 3962 (3*)     | T       | 0.88 | 0.89 |
| IL4R                                           | S503P          | rs1805015  | 3607 vs. 3692 (3*)     | T       | 0.83 | 0.83 |
| IL4R                                           | Q576R          | rs1801275  | 1764 vs. 1747 (4*)     | A       | 0.81 | 0.81 |
| IL6                                            | 597G>A         | rs1800797  | 2619 vs. 3396 (3)      | G       | 0.57 | 0.57 |
| IL6R                                           | D358A          | rs8192284  | 3070 vs. 20173 (3)     | A       | 0.60 | 0.69 |
| IL10                                           | 592 C/A        | rs1800872  | 1598 vs. 2760 (7)      | C       | 0.77 | 0.78 |
| IL16                                           | Pro434Ser      | rs4072111  | 6160 vs. 6643 (4*)     | C       | 0.88 | 0.88 |
| PPAR-gamma                                     |                | rs9858822  | 2152 vs. 2630 (5)      | A       | 0.91 | 0.90 |
| PPAR-gamma                                     | C1431T         | rs3856806  | 8098 vs. 11100(11*)    | C       | 0.87 | 0.88 |
| PPAR-gamma                                     | Pro12Ala       | rs1801282  | 15855 vs. 24348(22§**) | C       | 0.90 | 0.90 |
| PTGS1/COX1                                     | 50C>T          | rs3842787  | 5754 vs. 7916 (4)      | C       | 0.95 | 0.95 |
| PTGS1/COX1                                     | G213G          | rs5788     | 4087 vs. 4808 (3)      | C       | 0.86 | 0.86 |
| PTGS1/COX1                                     | Leu237Met      | rs5789     | 8164 vs. 10969 (6*)    | C       | 0.90 | 0.91 |
| PTGS1/COX1                                     | 262A>T         | rs10306135 | 4644 vs. 6893 (3)      | A       | 0.85 | 0.85 |
| PTGS1/COX1                                     | 268A>G         | rs6478565  | 4418 vs. 5909 (3*)     | A       | 0.84 | 0.83 |
| PTGS1/COX1                                     | R8W            | rs1236913  | 9511 vs. 11189 (6*)    | T       | 0.93 | 0.93 |
| PTGS2/COX2                                     | 78C>T          | rs4648261  | 4687 vs. 6951 (3)      | C       | 0.97 | 0.97 |
| PTGS2/COX2                                     | 565A>G         | rs2745557  | 4300 vs. 5825 (5)      | G       | 0.79 | 0.81 |
| PTGS2/COX2                                     | C1629G         | rs20424    | 3590 vs. 4927 (3)      | G       | 0.98 | 0.98 |
| PTGS2/COX2                                     |                | rs2206593  | 5391 vs. 6096 (3*)     | G       | 0.88 | 0.88 |
| PTGS2/COX2                                     | A1195G         | rs689466   | 7790 vs. 11652(12)     | A       | 0.78 | 0.77 |
| PTGS2/COX2                                     | A1803G         | rs4648298  | 2359 vs. 2538(5)       | A       | 0.97 | 0.97 |
| PTGS2/COX2                                     | C427T          | rs5275     | 12396 vs. 15884(13*)   | T       | 0.66 | 0.66 |
| PTGS2/COX2                                     | G306C          | rs5277     | 5740 vs. 7509(7)       | G       | 0.84 | 0.84 |
| PTGS2/COX2                                     | G765C          | rs20417    | 7785 vs. 11371(18)     | G       | 0.83 | 0.85 |
| PTGS2/COX2                                     | T1532C         | rs5273     | 720 vs. 1163(4)        | val/val | na   | na   |
| TNF-alpha                                      | 308G>A         | rs1800629  | 2980 vs. 4102(13)      | G       | 0.84 | 0.86 |
| TNF-alpha                                      | 238G>A         | rs361525   | 292 vs. 351 (4)        | G       | 0.99 | 0.96 |
| TNF-alpha                                      | 857C>T         | rs1799724  | 845 vs. 832 (4)        | C       | 0.87 | 0.87 |
| TNF-alpha                                      | 1031T>C        | rs1799964  | 1959 vs. 1948 (3§)     | T       | 0.80 | 0.79 |
| NOD2                                           | 3020incC       | rs5743293  | 4573 vs. 3733(10)      | G       | 0.96 | 0.97 |
| NOD2                                           | G908R          | rs2066845  | 3303 vs. 3088(9)       | G       | 0.99 | 0.99 |
| NOD2                                           | R702W          | rs2066844  | 3297 vs. 3088(9)       | C       | 0.96 | 0.97 |
| CRP                                            | L184L          | rs1800947  | 2853 vs. 3381(3)       | C       | 0.94 | 0.94 |
| CRP                                            | 2042C>T        | rs1205     | 3037 vs. 9333(4)       | C       | 0.63 | 0.67 |
| CTLA4                                          | 49A>G          | rs231775   | 777 vs. 1356(5)        | A       | 0.61 | 0.60 |
| DNMT3B                                         | C149T          | rs2424913  | 2398 vs. 3740(5)       | C       | 0.59 | 0.56 |
| DNMT3B                                         | G579T          | rs1569686  | 1224 vs. 1381(5)       | T       | 0.89 | 0.83 |
| NFKB1                                          | 94 ins/delATTG | rs28362491 | 2897 vs. 4961(11)      | 94 ins  | 0.56 | 0.57 |
| NFKB1A                                         |                | rs696      | 2310 vs. 3018(4*)      | C       | 0.59 | 0.59 |
| TLR4                                           | Asp299Gly      | rs4986790  | 4550 vs. 5432(10*)     | A       | 0.93 | 0.94 |
| TLR4                                           | Thr399Ile      | rs4986791  | 3387 vs. 4072(6)       | C       | 0.94 | 0.94 |
| CASP8                                          | -CTTACT(       | rs3834129  | 7226 vs. 11366(12)     | del     | 0.58 | 0.59 |
| MBL2                                           | R52C           | rs5030737  | 1185 vs. 1199(4)       | C       | 0.93 | 0.94 |
| MBL2                                           | Codon54        | rs1800450  | 6362 vs. 6511(5*)      | G       | 0.86 | 0.87 |
| MBL2                                           | Codon57        | rs1800451  | 819 vs. 843(3)         | G       | 0.95 | 0.94 |
| MBL2                                           | X/Y 221        | rs7096206  | 826 vs. 871(3)         | G       | 0.81 | 0.80 |
| MBL2                                           | variant H/L    | rs11003125 | 822 vs. 870(3)         | G       | 0.67 | 0.68 |
| MBL2                                           | PQ             | rs7095891  | 822 vs. 870(3)         | G       | 0.74 | 0.71 |
| RNASEL                                         | Arg462G        | rs486907   | 3524 vs. 3789(3*)      | G       | 0.66 | 0.66 |
| <b>Cell growth, differentiation, apoptosis</b> |                |            |                        |         |      |      |
| CCND1                                          | 870A           | rs17852153 | 6500 vs. 8885(20)      | G       | 0.47 | 0.48 |
| TGFB1                                          | C509T          | rs1800469  | 4021 vs. 6024(10)      | T       | 0.66 | 0.61 |
| TGFB1                                          | TGFB1*6A       | rs11466445 | 6705 vs. 8162(12**)    | C       | 0.90 | 0.91 |
| TGFB1                                          | G800A          | rs1800468  | 834 vs. 1579 (3)       | G       | 0.85 | 0.71 |
| TGFB1                                          | Leu10Pro       | rs1800470  | 998 vs. 1383 (4)       | A       | 0.57 | 0.57 |
| TGFB1                                          |                | rs4803455  | 3747 vs. 4513 (3*)     | C       | 0.49 | 0.52 |
| TGFB1                                          | Int7G24A       | rs334354   | 1012 vs. 1923 (3)      | G       | 0.74 | 0.70 |
| EGF                                            | A61G           | rs4444903  | 899 vs. 976(5)         | G       | 0.58 | 0.53 |
| PARP1                                          | Val762Ala      | rs1136410  | 7002 vs. 8328(7*)      | A       | 0.81 | 0.79 |
| CDKN1A                                         | 3UTRC>T        | rs1059234  | 1036 vs. 1512 (3)      | C       | 0.78 | 0.69 |
| CDKN1A                                         | codon31C       | rs1801270  | 1038 vs. 1513 (3)      | C       | 0.79 | 0.70 |
| KRAS                                           | let-7 KRAS     | rs712      | 1982 vs. 2194 (3)      | C       | 0.66 | 0.65 |
| BMP2                                           |                | rs355527   | 13539 vs. 14375(9)     | C       | 0.66 | 0.69 |

|                                |                   |            |                         |         |      |      |
|--------------------------------|-------------------|------------|-------------------------|---------|------|------|
| BMP4                           | V152A             | rs17563    | 3505 vs. 2518 (4)       | C       | 0.50 | 0.45 |
| TERT                           |                   | rs2736100  | 16176 vs. 18135(8)      | G       | 0.49 | 0.51 |
| Survivin31                     | 31G/C             | rs9904341  | 1452 vs. 1475(4)        | G       | 0.49 | 0.54 |
| <b>Insulin related</b>         |                   |            |                         |         |      |      |
| IGF1                           | CA-repeat         | n/a        | 9335 vs. 11089(9)       | 19/19   | 0.63 | 0.61 |
| IGFBP3                         | 202A>C            | rs2854744  | 10880 vs. 15046(12)     | A       | 0.50 | 0.52 |
| IGF1                           | C1410T            | rs35767    | 2792 vs. 4988 (3)       | C       | 0.75 | 0.75 |
| IGF1                           |                   | rs6214     | 1248 vs. 3005 (3*)      | C       | 0.58 | 0.61 |
| IGFBP1                         | Ile253Met         | rs4619     | 6537 vs. 6826 (4*)      | A       | 0.64 | 0.64 |
| IGFBP3                         | Ala32Gly          | rs2854746  | 4484 vs. 7577 (6)       | C       | 0.51 | 0.51 |
| IGFBP3                         |                   | rs3110697  | 3079 vs. 3860 (3*)      | G       | 0.59 | 0.59 |
| IRS                            | G972R             | rs1801278  | 9726 vs. 10756(9**)     | G       | 0.92 | 0.93 |
| IRS2                           | G1057D            | rs1805097  | 3890 vs. 4778(3)        | G       | 0.63 | 0.62 |
| <b>Iron metabolism</b>         |                   |            |                         |         |      |      |
| HFE                            | C282T             | rs1800562  | 6547 vs. 34156(10*)     | C       | 0.92 | 0.93 |
| HFE                            | H63D              | rs1799945  | 1495 vs. 2038 (5)       | C       | 0.86 | 0.88 |
| <b>Mitotic control</b>         |                   |            |                         |         |      |      |
| AURKA                          | F31I              | rs2273535  | 5221 vs. 4806 (5)       | T       | 0.76 | 0.76 |
| <b>Carbohydrate metabolism</b> |                   |            |                         |         |      |      |
| MTHFR                          | C677T             | rs1801133  | 43652 vs. 60883(94\$**) | C       | 0.67 | 0.66 |
| MTHFR                          | A1298C            | rs1801131  | 23523 vs. 35193(57\$)   | A       | 0.70 | 0.69 |
| MTHFR                          | 1793G>A           | rs2274976  | 2860 vs. 3414 (5*\$)    | G       | 0.95 | 0.94 |
| MTRR                           | 524 C>T           | rs1532268  | 4457 vs. 5807 (4*)      | C       | 0.63 | 0.63 |
| MTRR                           | 1049A>G           | rs162036   | 6473 vs. 7859 (4*)      | A       | 0.88 | 0.89 |
| MTRR                           | G1763A            | rs10380    | 9022 vs. 10910 (7*)     | G       | 0.90 | 0.90 |
| MTHFD1                         | Arg134Lys         | rs1950902  | 9059 vs. 11358(7*)      | G       | 0.82 | 0.82 |
| MTHFD1                         | R653Q             | rs2236225  | 11673 vs. 15250(10*)    | G       | 0.54 | 0.54 |
| MTR                            | A2756G            | rs1805087  | 18831 vs. 24357 (28*\$) | A       | 0.81 | 0.81 |
| MTRR                           | A66G              | rs1801394  | 10175 vs. 15506 (21)    | A       | 0.50 | 0.50 |
| TS                             | TSER              | rs34743033 | 5860 vs. 7540 (11)      | 3R/3R   | 0.63 | 0.63 |
| TS                             | Ts1494del6        | rs34489327 | 5786 vs. 6856 (8)       | ins/ins | 0.68 | 0.68 |
| <b>Rare, high penetrance</b>   |                   |            |                         |         |      |      |
| APC                            | E1317Q            | rs1801166  | 7161 vs. 8140 (7)       | G       | 0.99 | 0.99 |
| APC                            | D1822V            | rs459552   | 21929 vs. 20943 (22**)  | Asp     | 0.77 | 0.78 |
| MLH1                           | A655G             | rs1799977  | 15398 vs. 16730 (20*)   | A       | 0.69 | 0.69 |
| MLH1                           | -93 G>A           | rs1800734  | 21837 vs. 18831 (15*\$) | G       | 0.77 | 0.78 |
| APC                            | I1307K            | rs1801155  | 2389 vs. 4223 (5)       | T       | 0.97 | 0.97 |
| MLH1                           | V384D             | rs63750447 | 937 vs. 812 (4)         | T       | 0.96 | 0.98 |
| MLH1                           |                   | rs3774332  | 7556 vs. 7299 (4*)      | A       | 0.92 | 0.92 |
| <b>Substrate metabolism</b>    |                   |            |                         |         |      |      |
| CYP1A1                         | 2454A>G           | rs1048943  | 9661 vs. 11774 (19\$)   | A       | 0.89 | 0.89 |
| CYP1A1                         | 3698T>C           | rs4646903  | 9725 vs. 12104 (20)     | T       | 0.84 | 0.82 |
| CYP1A2                         | 163C>A            | rs762551   | 9669 vs. 10852 (16)     | A       | 0.70 | 0.70 |
| CYP1B1                         | 4326C>G           | rs1056836  | 10318 vs. 11251 (12)    | C       | 0.55 | 0.55 |
| CYP2C9                         | 430C>T            | rs1799853  | 9588 vs. 11428 (12)     | C       | 0.86 | 0.85 |
| CYP2C9                         | 1075A>C           | rs1057910  | 15444 vs. 17426 (13*)   | A       | 0.92 | 0.91 |
| CYP2E1                         | 1053C>T           | rs2031920  | 5216 vs. 6026 (11\$)    | C       | 0.90 | 0.89 |
| CYP2E1                         | 1293G>C           | rs3813867  | 5035 vs. 6688 (10)      | G       | 0.93 | 0.92 |
| CYP1A1                         | Thr461Asp         | rs1799814  | 4389 vs. 4621 (4\$)     | C       | 0.96 | 0.96 |
| CYP1A2                         | 1545T>C           | rs2470890  | 3638 vs. 3885 (4)       | T       | 0.60 | 0.59 |
| CYP1A2                         | 3858G>A           | rs2069514  | 1283 vs. 1305 (5)       | G       | 0.80 | 0.80 |
| CYP1B1                         | 119G>T            | rs1056827  | 3153 vs. 3199 (4)       | G       | 0.70 | 0.71 |
| CYP1B1                         | 142C>G            | rs10012    | 5336 vs. 5850 (6)       | C       | 0.70 | 0.71 |
| CYP1B1                         | 4390A>G           | rs1800440  | 11152 vs. 11918 (9*)    | A       | 0.82 | 0.82 |
| CYP17A1                        | T34C              | rs743572   | 5009 vs. 5163 (3)       | T       | 0.60 | 0.60 |
| CYP2C19                        | 681G>A            | rs4244285  | 3385 vs. 3498 (5)       | G       | 0.86 | 0.85 |
| CYP2D6                         | G1846A            | rs3892097  | 1153 vs. 1806 (4)       | G       | 0.81 | 0.80 |
| CYP2E1                         | 96-bp insertion   |            | 1614 vs. 2396 (6)       | non-ins | 0.86 | 0.89 |
| CYP2E1                         | 7632T>A           | rs6413432  | 3893 vs. 4643 (8)       | T       | 0.87 | 0.85 |
| CYP3A4                         | C4358G            | rs11773597 | 5005 vs. 5155 (3)       | G       | 0.93 | 0.93 |
| CYP3A4                         | G4713A            | rs2740574  | 5138 vs. 5295 (4)       | A       | 0.96 | 0.96 |
| GSTA1                          | 69C>T             | rs3957357  | 806 vs. 1103 (4)        | C       | 0.61 | 0.62 |
| GSTM1                          | K173N             | rs1065411  | 828 vs. 873 (3)         | G       | 0.61 | 0.62 |
| GSTM3                          | delAGG            | rs1799735  | 3505 vs. 4108 (5)       | ins     | 0.84 | 0.84 |
| GSTM1                          | Null variant      | n/a        | 28240 vs. 38880 (74)    | present | 0.57 | 0.61 |
| GSTP1                          | Ile105Val         | rs1695     | 16373 vs. 20872 (38*)   | IA      | 0.70 | 0.71 |
| GSTP1                          | Ala114Val         | rs1138272  | 12144 vs. 12586 (13*\$) | C       | 0.91 | 0.91 |
| GSTT1                          | Null variant      | n/a        | 19133 vs. 27821 (56)    | present | 0.63 | 0.62 |
| NAT1                           | slow/rapid        | n/a        | 4791 vs. 6628 (15)      | slow    | 0.69 | 0.68 |
| NAT2                           | slow/rapid        | n/a        | 8057 vs. 10431 (45)     | slow    | 0.63 | 0.62 |
| NAT1                           | 459G>A            | rs4986990  | 2253 vs. 2768 (3)       | G       | 0.98 | 0.98 |
| NAT1                           | 1088T>A           | rs1057126  | 2251 vs. 2747 (3)       | T       | 0.78 | 0.78 |
| NAT2                           | G286E             | rs1799931  | 2510 vs. 3130 (5)       | G       | 0.95 | 0.95 |
| NAT2                           | T341C             | rs1801280  | 2470 vs. 2971 (5)       | T       | 0.58 | 0.55 |
| NAT2                           | 481C>T            | rs1799929  | 1861 vs. 1952 (5\$)     | C       | 0.60 | 0.55 |
| NAT2                           | 590G>A            | rs1799930  | 6446 vs. 7193 (8\$)     | G       | 0.70 | 0.71 |
| NQ01                           | Pro187Ser (C609T) | rs1800566  | 11183 vs. 12525 (16*)   | C       | 0.78 | 0.78 |

|                                |                |            |                         |      |      |      |
|--------------------------------|----------------|------------|-------------------------|------|------|------|
| NQ01                           | Arg139Trp      | rs1131341  | 4436 vs. 4725 (4)       | C    | 0.96 | 0.96 |
| EPHX1                          | Y113H          | rs1051740  | 11718 vs. 13560(19*)    | T    | 0.69 | 0.69 |
| EPHX1                          | Arg139His      | rs2234922  | 6570 vs. 7960(14*)      | A    | 0.81 | 0.80 |
| FOLH1                          | His475Tyr      | x          | 3389 vs. 4333(4)        | His  | 0.82 | 0.83 |
| GPX1                           | Pro198Leu      | rs1050450  | 1974 vs. 2481(4)        | C    | 0.72 | 0.70 |
| GPX4                           |                | rs713041   | 1733 vs. 1519(3)        | C    | 0.60 | 0.60 |
| HPGD                           |                | rs8752     | 3968 vs. 4830(3*)       | A    | 0.57 | 0.58 |
| HPGD                           |                | rs9312555  | 3976 vs. 4831(3*)       | A    | 0.85 | 0.85 |
| HPGD                           |                | rs17360144 | 3962 vs. 4826(3*)       | A    | 0.93 | 0.93 |
| LCT                            | 13910C>T       | rs4988235  | 1927 vs. 2182(6)        | C    | 0.55 | 0.55 |
| NOS3                           | Glu298Asp      | rs1799983  | 2301 vs. 2478(5)        | G    | 0.78 | 0.77 |
| NOS3                           | Y786C          | rs2070744  | 1576 vs. 1782(3)        | T    | 0.81 | 0.79 |
| ABCB1 (MDR1)                   | 61A>G          | rs9282564  | 9536 vs. 9145 (6*)      | A    | 0.89 | 0.90 |
| ABCB1 (MDR1)                   | 1199G>A        | rs2229109  | 6143 vs. 6104 (5§)      | G    | 0.95 | 0.95 |
| ABCB1 (MDR1)                   | C1236T         | rs1128503  | 246 vs. 399 (3)         | C    | 0.55 | 0.42 |
| ABCB1 (MDR1)                   | G2677A         | rs2032582  | 1008 vs. 1100 (5)       | G    | 0.39 | 0.43 |
| ABCB1 (MDR1)                   | 3435T>C        | rs1045642  | 7537 vs. 8396 (16)      | T    | 0.52 | 0.51 |
| ABCB1 (MDR1)                   |                | rs868755   | 2958 vs. 3255 (3)       | G    | 0.56 | 0.58 |
| ABCB1 (MDR1)                   |                | rs1202168  | 7000 vs. 6485 (5)       | C    | 0.57 | 0.59 |
| ABCB1 (MDR1)                   |                | rs2214102  | 7865 vs. 7919 (5*)      | C    | 0.92 | 0.92 |
| ABCB1 (MDR1)                   |                | rs3789243  | 2724 vs. 3385 (4*§)     | G    | 0.50 | 0.51 |
| UGT1A1                         | 3156G>A        | rs10929302 | 1560 vs. 1952(3)        | G    | 0.64 | 0.65 |
| UGT1A1                         | 3279T>G        | rs4124874  | 1560 vs. 1987(3)        | T    | 0.58 | 0.58 |
| UGT1A1                         | UGT1A1*28      | x          | 3344 vs. 4159(8)        |      | 0.66 | 0.66 |
| UGT1A6                         | T181A          | rs2070959  | 4773 vs. 5070(4*)       | A    | 0.68 | 0.69 |
| UGT1A6                         | R184S          | rs1105879  | 7334 vs. 7774(5*)       | A    | 0.66 | 0.67 |
| UGT1A7                         |                | x          | 2316 vs. 2918(6)        |      | 0.56 | 0.58 |
| SULT1A1                        | c.638G>A       | rs9282861  | 4636 vs. 6291(12)       | G    | 0.68 | 0.67 |
| SULT1A2                        | Asn235Thr      | rs1059491  | 1806 vs. 1986(3)        | A    | 0.67 | 0.68 |
| SHMT1                          | C1420T         | rs1979277  | 1697 vs. 1994(5)        | C    | 0.70 | 0.68 |
| CBS                            | 844ins68       | rs5742905  | 2197 vs. 2579 (7)       | T    | 0.94 | 0.94 |
| ALOX12                         | Q261R          | rs1126667  | 3736 vs. 4610 (7*)      | G    | 0.55 | 0.57 |
| PLA2G2A                        | c.435+230C>T   | rs11677    | 5887 vs. 6774(4*)       | G    | 0.88 | 0.88 |
| SOD2                           | V16A           | rs4880     | 2496 vs. 2283(4)        | C    | 0.64 | 0.64 |
| COMT                           | V158M          | rs4680     | 9830 vs. 10176 (7*)     | G    | 0.51 | 0.50 |
| <b>Tumour suppressor genes</b> |                |            |                         |      |      |      |
| TP53                           | Arg72Pro       | rs1042522  | 10591 vs. 12673 (30)    | G    | 0.66 | 0.68 |
| TP53                           | intron 3 16bp  | rs17878362 | 1812 vs. 2319 (6)       | Del  | 0.85 | 0.85 |
| MDM2                           | 309 T/G        | rs2279744  | 3564 vs. 2835 (10)      | G    | 0.52 | 0.53 |
| TP73                           | G4C14          | x          | 858 vs. 1173(4)         | wild | 0.72 | 0.76 |
| ARLTS1                         | T442C          | rs3803185  | 2281 vs. 3196 (5**)     | T    | 0.50 | 0.54 |
| ARLTS1                         | G446A          | rs3430134  | 1010 vs. 1862 (3)       | G    | 0.99 | 0.99 |
| miR                            | pre-miR-27a    | rs895819   | 1322 vs. 1641(4)        | T    | 0.59 | 0.60 |
| miR                            | 149 C-T        | rs2292832  | 2355 vs. 2571(5*)       | C    | 0.69 | 0.68 |
| miR                            | 146a C-G       | rs2910164  | 5127 vs. 4110(8)        | G    | 0.70 | 0.53 |
| miR                            | 196a2 C-T      | rs11614913 | 2101 vs. 2961(7)        | C    | 0.50 | 0.50 |
| miR                            | 499            | rs3746444  | 717 vs. 1055(3)         | A    | 0.78 | 0.83 |
| <b>Vit D and Ca metabolism</b> |                |            |                         |      |      |      |
| VDR                            | BsmI (60890GA) | rs1544410  | 14789 vs. 15922 (16*)   | G    | 0.61 | 0.59 |
| VDR                            | TaqI           | rs731236   | 2091 vs. 2257 (9)       | C    | 0.63 | 0.65 |
| VDR                            | 23005G>A       | rs2238136  | 4584 vs. 4621 (5*)      | G    | 0.73 | 0.73 |
| VDR                            | 27823C>T       | rs2228570  | 16386 vs. 18814 (17**)  | C    | 0.60 | 0.59 |
| VDR                            | 29648A>G       | rs11568820 | 4001 vs. 4682 (5§)      | G    | 0.77 | 0.79 |
| VDR                            | 61888G>T       | rs7975232  | 3301 vs. 3402 (5)       | C    | 0.54 | 0.56 |
| <b>Common low penetrance</b>   |                |            |                         |      |      |      |
| SMAD7                          | rs4939827      | rs4939827  | 43924 vs. 44264 (21*)   | T    | 0.59 | 0.56 |
| SMAD7                          | rs12953717     | rs12953717 | 28006 vs. 26539 (13*)   | C    | 0.62 | 0.64 |
| SMAD7                          | rs4464148      | rs4464148  | 17772 vs. 17356 (9*)    | T    | 0.63 | 0.66 |
| 8q24                           | rs6983267      | rs6983267  | 51730 vs. 53589 (34***) | A    | 0.50 | 0.53 |
| 8q24                           | rs10505477     | rs10505477 | 18562 vs. 20132 (14)    | C    | 0.46 | 0.49 |
| 9p24                           | rs719725       | rs719725   | 13513 vs. 14999 (14)    | C    | 0.38 | 0.39 |
| 20p12.3                        | rs961253       | rs961253   | 22971 vs. 25270 (14*)   | C    | 0.66 | 0.68 |
| 8q23.3                         | rs16892766     | rs16892766 | 8351 vs. 8878 (6*)      | A    | 0.89 | 0.91 |
| 10p14                          | rs10795668     | rs10795668 | 16763 vs. 18302 (16*)   | G    | 0.69 | 0.67 |
| 11q23.1                        | rs3802842      | rs3802842  | 22320 vs. 22965 (20*)   | A    | 0.66 | 0.69 |
| 1q32.1                         | rs4951291      | rs4951291  | 15835 vs. 16724(9*)     | C    | 0.87 | 0.85 |
| <b>Lipids metabolism</b>       |                |            |                         |      |      |      |
| SCD                            |                | rs7849     | 2011 vs. 2580(3)        | A    | 0.83 | 0.82 |
| LIPC                           | N215S          | rs6083     | 7667 vs. 7980(4*)       | G    | 0.64 | 0.63 |
| ADIPOQ                         | 45 T>G         | rs2241766  | 1517 vs. 1909 (5)       | T    | 0.75 | 0.77 |
| ADIPOQ                         | 276 G>T        | rs1501299  | 2221 vs. 3035 (8)       | G    | 0.71 | 0.69 |
| ADIPOQ                         | 11377C>G       | rs266729   | 2173 vs. 2582 (5)       | C    | 0.72 | 0.71 |
| ADIPOR1                        | +5843 G>A      | rs1342387  | 2472 vs. 2848 (5*)      | G    | 0.59 | 0.56 |
| ADIPOR1                        |                | rs7539542  | 1098 vs. 1301 (3)       | G    | 0.45 | 0.43 |
| <b>Blood clotting</b>          |                |            |                         |      |      |      |
| SERPINE1                       |                | rs1799889  | 2241 vs. 2735(3)        | 4G   | 0.56 | 0.55 |

| <b>Hormone metabolism</b>                       |          |            |                     |      |      |      |
|-------------------------------------------------|----------|------------|---------------------|------|------|------|
| GH1                                             | 1663T>A  | rs2665802  | 3275 vs. 3848(7)    | T    | 0.57 | 0.55 |
| PGR                                             | V660L    | rs1042838  | 5232 vs. 5733(4*)   | C    | 0.83 | 0.84 |
| ESR1                                            | 351A>G   | rs9340799  | 5043 vs. 6090(7)    | A    | 0.65 | 0.64 |
| ESR1                                            | 397 T>C  | rs2234693  | 2792 vs. 3288(6)    | T    | 0.55 | 0.53 |
| ESR1                                            |          | rs2077647  | 2594 vs. 3086(4)    | T    | 0.53 | 0.53 |
| ESR1                                            |          | rs3798577  | 2593 vs. 3100(4)    | T    | 0.54 | 0.54 |
| ESR2                                            |          | rs928554   | 2574 vs. 2977(3)    | T    | 0.57 | 0.59 |
| SHBG                                            | D356N    | rs6259     | 6312 vs. 6820(5*)   | G    | 0.88 | 0.84 |
| <b>Calcium sensing receptor</b>                 |          |            |                     |      |      |      |
| CASR                                            | A986S    | rs1801725  | 6000 vs. 6425 (4*)  | G    | 0.87 | 0.87 |
| CASR                                            | R990G    | rs1042636  | 9265 vs. 10905 (5*) | A    | 0.92 | 0.91 |
| <b>Leptin coding gene and receptor</b>          |          |            |                     |      |      |      |
| LEP                                             | G19A     | rs2167270  | 1839 vs. 2429(3)    | G    | 0.63 | 0.62 |
| LEP                                             | G2548A   | rs7799039  | 2324 vs. 2776(3)    | G    | 0.57 | 0.56 |
| LEPR                                            | Q223R    | rs1137101  | 4059 vs. 4225(4*)   | A    | 0.55 | 0.55 |
| <b>G-protein signaling_RhoB regulation</b>      |          |            |                     |      |      |      |
| RHPN2                                           |          | rs7259371  | 15762 vs. 16700(9*) | A    | 0.84 | 0.82 |
| <b>Transmembrane transporter</b>                |          |            |                     |      |      |      |
| SLC19A1                                         | 80G>A    | rs1051266  | 4289 vs. 5817(6)    | G    | 0.54 | 0.55 |
| SLC22A4                                         | 979C>T   | rs1050152  | 3820 vs. 4749(5*)   | C    | 0.51 | 0.52 |
| <b>Transcription factor</b>                     |          |            |                     |      |      |      |
| TCF7L2                                          | 47833C>T | rs7903146  | 5059 vs. 21289(6*)  | C    | 0.75 | 0.74 |
| HIF1A                                           | 1772 C>T | rs11549465 | 6036 vs. 8066(5*)   | C    | 0.91 | 0.91 |
| <b>Nucleic acid binding and ATPase activity</b> |          |            |                     |      |      |      |
| BLM                                             | ASH      | x          | 1741 vs. 11043 (3)  | wild | 0.99 | 1.00 |
| <b>Others</b>                                   |          |            |                     |      |      |      |
| 15q13.3                                         |          | rs4779584  | 6994 vs. 7280(7*)   | C    | 0.56 | 0.57 |
|                                                 |          | rs4951039  | 13791 vs. 14288(7*) | A    | 0.86 | 0.85 |

a) ref allele frequency taken from 1000 genomes data

\* Includes GWAS data from SOCCS

§ Includes GWAS data from Ontario

\*\* Tomlinson 2008 was based on 10 samples

Supplementary Table S2. The Bayesian false-discovery probabilities (BFDP) for allelic model.

| Gene         | Variant    | Cases vs. controls<br>(number of samples) | N  | ALLELIC MODEL     |          |                         |          |          |          |          |          |          |          |
|--------------|------------|-------------------------------------------|----|-------------------|----------|-------------------------|----------|----------|----------|----------|----------|----------|----------|
|              |            |                                           |    | Effect size       |          | Heterogeneity           |          | BFDP     |          |          |          |          |          |
|              |            |                                           |    | OR (95% CI)       | P value  | I <sup>2</sup> (95% CI) | P value  | 0.05     | 0.01     | 1.00E-03 | 1.00E-04 | 1.00E-06 | 1.00E-07 |
| 11q23.1      | rs3802842  | 22320 vs. 22965 (20*)                     | 20 | 1.15 (1.11, 1.20) | 5.21E-12 | 43 (0, 78)              | 0.024    | 2.30E-07 | 1.20E-06 | 1.21E-05 | 1.21E-04 | 0.01     | 0.11     |
| 8q24         | rs10505477 | 18562 vs. 20132 (14)                      | 14 | 1.14 (1.10, 1.19) | 2.04E-11 | 44 (0, 82)              | 0.040    | 3.71E-06 | 1.94E-05 | 1.95E-04 | 1.95E-03 | 0.16     | 0.66     |
|              | rs355527   | 13539 vs. 14375(9)                        | 9  | 1.12(1.08,1.17)   | 1.65E-10 | 0(0,0)                  | 0.977    | 4.97E-04 | 2.59E-03 | 0.03     | 0.21     | 0.96     | 1.00     |
| DNMT3B       | rs1569686  | 1224 vs. 1381(5)                          | 4  | 0.57(0.47,0.68)   | 1.81E-09 | 0(0,0)                  | 0.992    | 3.63E-06 | 1.89E-05 | 1.91E-04 | 1.91E-03 | 0.16     | 0.66     |
| SMAD7        | rs4464148  | 17772 vs. 17356 (9*)                      | 9  | 1.12 (1.08, 1.16) | 2.66E-09 | 12 (0, 92)              | 0.337    | 5.10E-07 | 2.66E-06 | 2.68E-05 | 2.68E-04 | 0.03     | 0.21     |
| 8q23.3       | rs16892766 | 8351 vs. 8878 (6*)                        | 6  | 1.24 (1.15, 1.34) | 1.67E-08 | 4 (0, 92)               | 0.393    | 6.52E-05 | 3.40E-04 | 3.42E-03 | 0.03     | 0.77     | 0.97     |
|              | rs1862748  | 17436 vs. 18418(11)                       | 11 | 0.91(0.88,0.94)   | 1.98E-08 | 0(0,63)                 | 0.703    | 2.34E-05 | 1.22E-04 | 1.23E-03 | 0.01     | 0.55     | 0.92     |
| MUTYH        | rs34612342 | 28180 vs. 20923(19*)                      | 17 | 1.89(1.47,2.42)   | 5.72E-07 | 0(0,62)                 | 0.828    | 3.37E-03 | 0.02     | 0.15     | 0.64     | 0.99     | 1.00     |
| SMAD7        | rs12953717 | 28006 vs. 26539 (13*)                     | 13 | 1.11 (1.07, 1.16) | 6.24E-07 | 49 (0, 93)              | 0.024    | 3.00E-03 | 0.15     | 0.64     | 0.95     | 0.99     | 0.99     |
| MUTYH        | rs36053993 | 28302 vs. 20935(19*)                      | 19 | 1.42(1.22,1.66)   | 4.89E-06 | 0(0,33)                 | 0.703    | 0.01     | 0.06     | 0.38     | 0.86     | 1.00     | 1.00     |
| 20p12.3      | rs961253   | 22971 vs. 25270 (14*)                     | 14 | 1.11 (1.06, 1.16) | 1.58E-05 | 60 (28, 91)             | 0.002    | 4.15E-03 | 0.02     | 0.18     | 0.69     | 1.00     | 1.00     |
|              | rs7259371  | 15762 vs. 16700(9*)                       | 9  | 0.87(0.82,0.93)   | 1.65E-05 | 52(0,90)                | 0.034    | 0.03     | 0.15     | 0.64     | 0.95     | 1.00     | 1.00     |
| 8q24         | rs6983267  | 51730 vs. 53589 (34*)                     | 34 | 1.11 (1.06, 1.17) | 1.75E-05 | 85 (77, 93)             | 1.93E-28 | 0.08     | 0.31     | 0.82     | 0.98     | 1.00     | 1.00     |
| TERT         | rs2736100  | 16176 vs. 18135(8)                        | 8  | 1.07(1.04,1.10)   | 2.95E-05 | 0(0,82)                 | 0.526    | 2.98E-03 | 0.02     | 0.14     | 0.61     | 0.99     | 1.00     |
| 10p14        | rs10795668 | 16763 vs. 18302 (16*)                     | 16 | 0.88 (0.83, 0.94) | 4.35E-05 | 67 (34, 89)             | 0.000    | 0.09     | 0.35     | 0.85     | 0.98     | 1.00     | 1.00     |
| PPAR-gamma   | rs9858822  | 2152 vs. 2630 (5)                         | 4  | 1.40 (1.19, 1.65) | 4.69E-05 | 0 (0, 98)               | 0.697    | 0.05     | 0.21     | 0.72     | 0.96     | 1.00     | 1.00     |
| NOD2         | rs2066847  | 4573 vs. 3733(10)                         | 10 | 1.39(1.16,1.66)   | 3.21E-04 | 0(0,71)                 | 0.547    | 0.16     | 0.49     | 0.91     | 0.99     | 1.00     | 1.00     |
| TGFB1        | rs4803455  | 3747 vs. 4513 (3*)                        | 3  | 1.11 (1.04, 1.18) | 0.001    | 0 (0, 71)               | 0.903    | 0.35     | 0.74     | 0.97     | 1.00     | 1.00     | 1.00     |
| VDR          | rs11568820 | 4001 vs. 4682 (5§)                        | 4  | 1.14 (1.05, 1.23) | 0.001    | 0 (0, 92)               | 0.648    | 0.29     | 0.68     | 0.96     | 1.00     | 1.00     | 1.00     |
| APC          | rs1801155  | 2389 vs. 4223 (5)                         | 5  | 1.60 (1.21, 2.11) | 0.001    | 27 (0, 94)              | 0.244    | 0.30     | 0.96     | 1.00     | 1.00     | 1.00     | 1.00     |
| 9p24         | rs719725   | 13513 vs. 14999 (14)                      | 14 | 1.07 (1.02, 1.11) | 0.002    | 24 (0, 79)              | 0.190    | 0.25     | 0.63     | 0.94     | 0.99     | 1.00     | 1.00     |
| ERCC5        | rs17655    | 9653 vs. 11367(14)                        | 13 | 1.07(1.02,1.12)   | 0.003    | 0(0,73)                 | 0.626    | 0.73     | 0.93     | 0.99     | 1.00     | 1.00     | 1.00     |
| miR          | rs895819   | 1322 vs. 1641(4)                          | 4  | 1.18(1.06,1.32)   | 0.003    | 4(0,95)                 | 0.373    | 0.58     | 0.99     | 1.00     | 1.00     | 1.00     | 1.00     |
| NAT2         | rs1799929  | 1861 vs. 1952 (5§)                        | 5  | 0.84 (0.74, 0.95) | 0.004    | 20 (0, 94)              | 0.289    | 0.19     | 0.93     | 0.99     | 1.00     | 1.00     | 1.00     |
| MMP1         | rs1799750  | 1660 vs. 2024(10)                         | 9  | 0.78(0.66,0.93)   | 0.005    | 59(8,88)                | 0.012    | 0.65     | 0.91     | 0.99     | 1.00     | 1.00     | 1.00     |
| NQO1         | rs1800566  | 11183 vs. 12525 (16*)                     | 16 | 1.17 (1.05, 1.30) | 0.006    | 80 (66, 94)             | 1.17E-09 | 0.58     | 0.88     | 0.99     | 1.00     | 1.00     | 1.00     |
| CHEK2        | rs1787996  | 1687 vs. 3370 (3)                         | 3  | 1.47 (1.12, 1.92) | 0.006    | 0 (0, 98)               | 0.499    | 0.68     | 0.92     | 0.99     | 1.00     | 1.00     | 1.00     |
| CYP1A1       | rs1048943  | 9661 vs. 11774 (19§)                      | 19 | 1.28 (1.07, 1.52) | 0.006    | 84 (83, 96)             | 1.15E-15 | 0.63     | 0.99     | 0.99     | 1.00     | 1.00     | 1.00     |
| XRCC1        | rs25487    | 13017 vs. 18166(37)                       | 37 | 1.11(1.03,1.19)   | 0.008    | 71(68,90)               | 8.64E-12 | 0.55     | 0.99     | 1.00     | 1.00     | 1.00     | 1.00     |
| MTHFR        | rs1801133  | 43652 vs. 60883(94§**)                    | 91 | 0.96(0.93,0.99)   | 0.009    | 53(59,85)               | 3.61E-09 | 0.69     | 0.99     | 1.00     | 1.00     | 1.00     | 1.00     |
| VDR          | rs1544410  | 14789 vs. 15922 (16*)                     | 16 | 0.83(0.72, 0.96)  | 0.011    | 93 (91, 95)             | 5.59E-40 | 0.78     | 0.95     | 0.99     | 1.00     | 1.00     | 1.00     |
| MSH3         | rs26779    | 6050 vs. 8024(6*)                         | 6  | 1.07(1.02,1.14)   | 0.013    | 11(0,92)                | 0.343    | 0.94     | 0.99     | 1.00     | 1.00     | 1.00     | 1.00     |
| TP73         | G4C14      | 858 vs. 1173(4)                           | 4  | 1.21(1.04,1.40)   | 0.013    | 4(0,92)                 | 0.371    | 0.75     | 0.94     | 0.99     | 1.00     | 1.00     | 1.00     |
| ADIPOR1      | rs1342387  | 2472 vs. 2848 (5*)                        | 5  | 0.87 (0.78, 0.98) | 0.018    | 48 (0, 95)              | 0.105    | 0.86     | 0.97     | 1.00     | 1.00     | 1.00     | 1.00     |
| CCND1        | rs17852153 | 6500 vs. 8885(20)                         | 20 | 1.10(1.02,1.19)   | 0.019    | 58(45,92)               | 0.001    | 0.87     | 0.97     | 1.00     | 1.00     | 1.00     | 1.00     |
|              | rs4951291  | 15835 vs. 16724(9*)                       | 9  | 0.91(0.84,0.99)   | 0.021    | 68(22,88)               | 0.002    | 0.90     | 0.98     | 1.00     | 1.00     | 1.00     | 1.00     |
| MLH1         | rs63750447 | 937 vs. 812 (4)                           | 3  | 2.14 (1.12, 4.10) | 0.022    | 39 (0, 99)              | 0.194    | 0.91     | 0.98     | 1.00     | 1.00     | 1.00     | 1.00     |
| ESR2         | rs928554   | 2574 vs. 2977(3)                          | 3  | 1.09(1.01,1.18)   | 0.025    | 0(0,89)                 | 0.743    | 0.92     | 0.98     | 1.00     | 1.00     | 1.00     | 1.00     |
| SCD          | rs7849     | 2011 vs. 2580(3)                          | 3  | 0.85(0.73,0.98)   | 0.025    | 29(0,98)                | 0.247    | 0.86     | 0.97     | 1.00     | 1.00     | 1.00     | 1.00     |
| GH1          | rs2665802  | 3275 vs. 3848(7)                          | 7  | 0.89(0.80,0.99)   | 0.025    | 49(0,97)                | 0.069    | 0.90     | 0.98     | 1.00     | 1.00     | 1.00     | 1.00     |
| MTHFD1       | rs1950902  | 9059 vs. 11358(7*)                        | 7  | 0.94(0.89,0.99)   | 0.026    | 3(0,82)                 | 0.400    | 0.91     | 0.98     | 1.00     | 1.00     | 1.00     | 1.00     |
| NOD2         | rs2066844  | 3297 vs. 3088(9)                          | 9  | 1.38(1.04,1.84)   | 0.026    | 39(0,91)                | 0.109    | 0.87     | 0.97     | 1.00     | 1.00     | 1.00     | 1.00     |
| ARLTS1       | rs3803185  | 2281 vs. 3196 (5)                         | 5  | 1.09 (1.01, 1.18) | 0.026    | 0 (0, 76)               | 0.803    | 0.92     | 0.98     | 1.00     | 1.00     | 1.00     | 1.00     |
| ABCB1 (MDR1) | rs1128503  | 246 vs. 399 (3)                           | 3  | 0.70 (0.51, 0.96) | 0.027    | 45 (0, 98)              | 0.164    | 0.87     | 0.97     | 1.00     | 1.00     | 1.00     | 1.00     |
| ADIPOQ       | rs2241766  | 1517 vs. 1909 (5)                         | 5  | 1.17 (1.01, 1.35) | 0.030    | 29 (0, 97)              | 0.231    | 0.88     | 0.97     | 1.00     | 1.00     | 1.00     | 1.00     |
| RAD18        | rs373572   | 6560 vs. 6906(5*)                         | 5  | 1.15(1.01,1.30)   | 0.031    | 75(33,98)               | 0.003    | 0.87     | 0.97     | 1.00     | 1.00     | 1.00     | 1.00     |

|            |           |                     |    |                   |       |           |       |      |      |      |      |      |      |
|------------|-----------|---------------------|----|-------------------|-------|-----------|-------|------|------|------|------|------|------|
| PGR        | rs1042838 | 5232 vs. 5733(4*)   | 4  | 1.08(1.01,1.16)   | 0.034 | 0(0,95)   | 0.507 | 0.93 | 0.99 | 1.00 | 1.00 | 1.00 | 1.00 |
| PTGS2/COX2 | rs20417   | 7785 vs. 11371(18)  | 17 | 1.10(1.00,1.20)   | 0.035 | 37(0,83)  | 0.062 | 0.87 | 1.00 | 1.00 | 1.00 | 1.00 | 1.00 |
| TGFB1      | rs1800469 | 4021 vs. 6024(10)   | 10 | 0.89(0.80,0.99)   | 0.036 | 53(2,92)  | 0.023 | 0.75 | 0.99 | 0.99 | 1.00 | 1.00 | 1.00 |
| HFE        | rs1800562 | 6547 vs. 34156(10*) | 10 | 1.10(1.01,1.20)   | 0.040 | 0(0,40)   | 0.850 | 0.91 | 0.98 | 1.00 | 1.00 | 1.00 | 1.00 |
| AXIN2      | rs2240308 | 4723 vs. 4932 (4*)  | 4  | 1.06 (1.00, 1.12) | 0.040 | 0 (0, 92) | 0.397 | 0.94 | 0.99 | 1.00 | 1.00 | 1.00 | 1.00 |
| CHEK2      | 1100delC  | 2417 vs. 3615 (4)   | 4  | 1.66 (1.01, 2.73) | 0.048 | 0 (0, 83) | 0.835 | 0.92 | 0.98 | 1.00 | 1.00 | 1.00 | 1.00 |
| MSH3       | rs184967  | 8151 vs. 10103(4*)  | 4  | 1.08(1.00,1.16)   | 0.049 | 35(0,98)  | 0.204 | 0.93 | 0.99 | 1.00 | 1.00 | 1.00 | 1.00 |

\* Includes GWAS data from SOCCS

§ Includes GWAS data from Ontario

\*\* Tomlinson 2008 was based on 10 samples

Supplementary Table S3. The Bayesian false-discovery probabilities (BFDP) for dominant model.

| Gene         | Variant      | Cases vs. controls<br>(number of samples) | N  | DOMINANT MODEL    |          |                         |          |          |          |          |          |          |          |
|--------------|--------------|-------------------------------------------|----|-------------------|----------|-------------------------|----------|----------|----------|----------|----------|----------|----------|
|              |              |                                           |    | Effect size       |          | Heterogeneity           |          | BFDP     |          |          |          |          |          |
|              |              |                                           |    | OR (95% CI)       | P value  | I <sup>2</sup> (95% CI) | P value  | 0.05     | 0.01     | 1.00E-03 | 1.00E-04 | 1.00E-06 | 1.00E-07 |
| 11q23.1      | rs3802842    | 22320 vs. 22965 (20*)                     | 20 | 1.19 (1.13, 1.25) | 7.22E-12 | 33 (0, 70)              | 0.075    | 8.26E-09 | 4.31E-08 | 4.34E-07 | 4.35E-06 | 4.35E-04 | 4.33E-03 |
| 8q24         | rs10505477   | 18562 vs. 20132 (14)                      | 14 | 1.24 (1.17, 1.32) | 1.04E-11 | 36 (0, 81)              | 0.084    | 2.82E-08 | 1.47E-07 | 1.48E-06 | 1.48E-05 | 1.48E-03 | 0.01     |
| SMAD7        | rs4464148    | 17772 vs. 17356 (9*)                      | 9  | 1.16 (1.11, 1.21) | 2.09E-10 | 2 (0, 86)               | 0.416    | 1.14E-08 | 5.92E-08 | 5.98E-07 | 5.98E-06 | 5.98E-04 | 0.01     |
| DNMT3B       | rs1569686    | 1224 vs. 1381(5)                          | 5  | 0.46(0.36,0.59)   | 2.40E-09 | 30(0,95)                | 0.223    | 4.60E-05 | 2.40E-04 | 2.41E-03 | 0.02     | 0.71     | 0.96     |
|              | rs355527     | 13539 vs. 14375(9)                        | 9  | 1.16(1.10,1.21)   | 2.43E-09 | 0(0,9)                  | 0.966    | 1.14E-08 | 5.92E-08 | 5.98E-07 | 5.98E-06 | 5.98E-04 | 0.01     |
| 8q23.3       | rs16892766   | 8351 vs. 8878 (6*)                        | 6  | 1.27 (1.17, 1.38) | 4.00E-09 | 3 (0, 90)               | 0.400    | 2.23E-05 | 1.16E-04 | 1.17E-03 | 0.01     | 0.54     | 0.92     |
| TERT         | rs2736100    | 16176 vs. 18135(8)                        | 8  | 1.13(1.08,1.20)   | 2.03E-06 | 0(0,64)                 | 0.788    | 0.05     | 0.22     | 0.74     | 0.97     | 1.00     | 1.00     |
|              | rs7259371    | 15762 vs. 16700(9*)                       | 9  | 0.86(0.80,0.92)   | 3.81E-06 | 42(0,87)                | 0.084    | 0.01     | 0.05     | 0.35     | 0.84     | 1.00     | 1.00     |
|              | rs1862748    | 17436 vs. 18418(11)                       | 11 | 0.91(0.87,0.95)   | 6.31E-06 | 0(0,70)                 | 0.511    | 0.02     | 0.09     | 0.51     | 0.91     | 1.00     | 1.00     |
| MUTYH        | rs34612342   | 28180 vs. 20923(19*)                      | 17 | 1.80(1.39,2.31)   | 6.42E-06 | 0(0,52)                 | 0.884    | 0.02     | 0.08     | 0.45     | 0.89     | 1.00     | 1.00     |
| 8q24         | rs6983267    | 51730 vs. 53589 (34*)                     | 34 | 1.16 (1.08, 1.24) | 2.98E-05 | 80 (69, 92)             | 0.000    | 0.01     | 0.05     | 0.37     | 0.85     | 1.00     | 1.00     |
| 20p12.3      | rs961253     | 22971 vs. 25270 (14*)                     | 14 | 1.14 (1.07, 1.21) | 4.75E-05 | 57 (21, 88)             | 4.00E-03 | 0.01     | 0.07     | 0.44     | 0.89     | 1.00     | 1.00     |
| SMAD7        | rs12953717   | 28006 vs. 26539 (13*)                     | 13 | 1.14 (1.07, 1.21) | 5.00E-05 | 54 (10, 95)             | 0.020    | 0.01     | 0.42     | 0.88     | 0.99     | 1.00     | 1.00     |
| 10p14        | rs10795668   | 16763 vs. 18302 (16*)                     | 16 | 0.85 (0.79, 0.93) | 2.27E-04 | 68 (34, 87)             | 3.06E-05 | 0.18     | 0.54     | 0.92     | 0.99     | 1.00     | 1.00     |
| PPAR-gamma   | rs9858822    | 2152 vs. 2630 (5)                         | 4  | 1.47 (1.19, 1.83) | 4.55E-04 | 0 (0, 98)               | 0.618    | 0.29     | 0.68     | 0.95     | 1.00     | 1.00     | 1.00     |
| GSTM1        | Null variant | 28240 vs. 38880 (74)                      | 74 | 1.10 (1.05, 1.16) | 0.001    | 47 (34, 75)             | 6.63E-06 | 0.19     | 0.93     | 0.99     | 0.99     | 1.00     | 1.00     |
| MUTYH        | rs36053993   | 28302 vs. 20935(19*)                      | 19 | 1.31(1.12,1.53)   | 6.27E-04 | 0(0,24)                 | 0.837    | 0.25     | 0.64     | 0.95     | 0.99     | 1.00     | 1.00     |
| NOD2         | rs2066847    | 4573 vs. 3733(10)                         | 10 | 1.38(1.14,1.66)   | 7.22E-04 | 0(0,74)                 | 0.488    | 0.27     | 0.65     | 0.95     | 0.99     | 1.00     | 1.00     |
| ABCB1 (MDR1) | rs1128503    | 246 vs. 399 (3)                           | 3  | 0.52 (0.35, 0.76) | 8.66E-04 | 0 (0, 96)               | 0.617    | 0.57     | 0.87     | 0.99     | 1.00     | 1.00     | 1.00     |
| TGFB1        | rs4803455    | 3747 vs. 4513 (3*)                        | 3  | 1.18 (1.06, 1.30) | 0.001    | 0 (0, 85)               | 0.879    | 0.29     | 0.68     | 0.96     | 1.00     | 1.00     | 1.00     |
| APC          | rs1801155    | 2389 vs. 4223 (5)                         | 5  | 1.62 (1.21, 2.16) | 0.001    | 28 (0, 94)              | 2.35E-01 | 0.32     | 0.96     | 1.00     | 1.00     | 1.00     | 1.00     |
| XPC          | rs2228000    | 2677 vs. 4253(6)                          | 6  | 0.58(0.41,0.82)   | 0.002    | 92(83,99)               | 0.000    | 0.65     | 0.91     | 0.99     | 1.00     | 1.00     | 1.00     |
| MMP1         | rs1799750    | 1660 vs. 2024(10)                         | 10 | 0.70(0.56,0.88)   | 0.002    | 57(9,88)                | 0.013    | 0.53     | 0.85     | 0.98     | 1.00     | 1.00     | 1.00     |
| ADIPOQ       | rs2241766    | 1517 vs. 1909 (5)                         | 5  | 1.26 (1.09, 1.47) | 0.002    | 8 (0, 96)               | 0.364    | 0.55     | 0.86     | 0.98     | 1.00     | 1.00     | 1.00     |
| CCND1        | rs17852153   | 6500 vs. 8885(20)                         | 20 | 1.15(1.05,1.26)   | 0.003    | 18(0,76)                | 0.226    | 0.55     | 0.86     | 0.98     | 1.00     | 1.00     | 1.00     |
| ERCC5        | rs17655      | 9653 vs. 11367(14)                        | 14 | 1.14(1.04,1.24)   | 0.004    | 44(0,85)                | 3.82E-02 | 0.52     | 0.85     | 0.98     | 1.00     | 1.00     | 1.00     |
| VDR          | rs11568820   | 4001 vs. 4682 (58)                        | 5  | 1.14 (1.04, 1.24) | 0.004    | 0 (0, 0)                | 0.989    | 0.52     | 0.85     | 0.98     | 1.00     | 1.00     | 1.00     |
| CHEK2        | rs1787996    | 1687 vs. 3370 (3)                         | 3  | 1.48 (1.13, 1.95) | 0.005    | 0 (0, 98)               | 0.496    | 0.70     | 0.93     | 0.99     | 1.00     | 1.00     | 1.00     |
| NQ01         | rs1800566    | 11183 vs. 12525 (16*)                     | 16 | 1.20 (1.06, 1.37) | 0.006    | 78 (64, 94)             | 0.000    | 0.70     | 0.92     | 0.99     | 1.00     | 1.00     | 1.00     |
| 9p24         | rs719725     | 13513 vs. 14999 (14)                      | 14 | 1.09 (1.02, 1.17) | 0.008    | 0 (0, 66)               | 5.21E-01 | 0.87     | 0.97     | 1.00     | 1.00     | 1.00     | 1.00     |
| CYP1A1       | rs1048943    | 9661 vs. 11774 (198)                      | 19 | 1.36 (1.08, 1.72) | 0.009    | 88 (93, 98)             | 0.000    | 0.75     | 0.99     | 1.00     | 1.00     | 1.00     | 1.00     |
| PGR          | rs1042838    | 5232 vs. 5733(4*)                         | 4  | 1.11(1.02,1.21)   | 0.012    | 0(0,96)                 | 0.450    | 0.86     | 0.97     | 1.00     | 1.00     | 1.00     | 1.00     |
| CYP2C9       | rs1799853    | 9588 vs. 11428 (12)                       | 12 | 0.93 (0.87, 0.99) | 0.015    | 0 (0, 72)               | 0.452    | 0.91     | 0.98     | 1.00     | 1.00     | 1.00     | 1.00     |
| VDR          | rs1544410    | 14789 vs. 15922 (16*)                     | 16 | 0.82 (0.69, 0.96) | 0.015    | 88 (83, 91)             | 0.000    | 0.79     | 0.95     | 0.99     | 1.00     | 1.00     | 1.00     |
| MTHFD1       | rs1950902    | 9059 vs. 11358(7*)                        | 7  | 0.92(0.86,0.98)   | 0.015    | 15(0,90)                | 3.13E-01 | 0.82     | 0.96     | 1.00     | 1.00     | 1.00     | 1.00     |
| NAT2         | rs1799929    | 1861 vs. 1952 (58)                        | 5  | 0.85 (0.74, 0.97) | 0.016    | 0 (0, 85)               | 0.872    | 0.51     | 0.98     | 1.00     | 1.00     | 1.00     | 1.00     |
| ABCB1 (MDR1) | rs9282564    | 9536 vs. 9145 (6*)                        | 6  | 1.09 (1.01, 1.17) | 0.018    | 0 (0, 70)               | 0.729    | 0.87     | 0.97     | 1.00     | 1.00     | 1.00     | 1.00     |
| MLH1         | rs63750447   | 937 vs. 812 (4)                           | 3  | 2.17 (1.14, 4.14) | 0.019    | 36 (0, 98)              | 0.208    | 0.91     | 0.98     | 1.00     | 1.00     | 1.00     | 1.00     |
| miR          | rs2292832    | 2355 vs. 2571(5*)                         | 5  | 0.87(0.78,0.98)   | 0.021    | 0(0,88)                 | 0.704    | 0.86     | 0.97     | 1.00     | 1.00     | 1.00     | 1.00     |
| XRCC1        | rs25487      | 13017 vs. 18166(37)                       | 37 | 1.11(1.01,1.21)   | 0.023    | 63(58,89)               | 0.000    | 0.82     | 1.00     | 1.00     | 1.00     | 1.00     | 1.00     |
| MSH3         | rs26779      | 6050 vs. 8024(6*)                         | 6  | 1.08(1.01,1.15)   | 0.030    | 0(0,85)                 | 0.682    | 0.88     | 0.97     | 1.00     | 1.00     | 1.00     | 1.00     |
| EGF          | rs4444903    | 899 vs. 976(5)                            | 5  | 0.65(0.44,0.96)   | 0.030    | 67(12,97)               | 0.016    | 0.89     | 0.98     | 1.00     | 1.00     | 1.00     | 1.00     |
| SERPINE1     | rs1799889    | 2241 vs. 2735(3)                          | 3  | 0.87(0.77,0.99)   | 0.030    | 0(0,98)                 | 0.372    | 0.89     | 0.98     | 1.00     | 1.00     | 1.00     | 1.00     |
| NOD2         | rs2066844    | 3297 vs. 3088(9)                          | 9  | 1.35(1.02,1.78)   | 0.033    | 33(0,90)                | 0.155    | 0.88     | 0.97     | 1.00     | 1.00     | 1.00     | 1.00     |
| HFE          | rs1800562    | 6547 vs. 34156(10*)                       | 10 | 1.10(1.01,1.21)   | 0.037    | 0(0,25)                 | 0.937    | 0.93     | 0.99     | 1.00     | 1.00     | 1.00     | 1.00     |
| AXIN2        | rs2240308    | 4723 vs. 4932 (4*)                        | 4  | 1.10 (1.01, 1.21) | 0.037    | 0 (0, 76)               | 0.758    | 0.93     | 0.99     | 1.00     | 1.00     | 1.00     | 1.00     |



|              |           |                    |   |                   |       |            |          |      |      |      |      |      |      |
|--------------|-----------|--------------------|---|-------------------|-------|------------|----------|------|------|------|------|------|------|
| ESR2         | rs928554  | 2574 vs. 2977(3)   | 3 | 1.13(1.01,1.26)   | 0.041 | 0(0,89)    | 0.876    | 0.88 | 0.98 | 1.00 | 1.00 | 1.00 | 1.00 |
| ABCB1 (MDR1) | rs1202168 | 7000 vs. 6485 (5)  | 5 | 1.12 (1.00, 1.24) | 0.042 | 52 (0, 93) | 0.080    | 0.89 | 0.98 | 1.00 | 1.00 | 1.00 | 1.00 |
| NAT2         | rs1799930 | 6446 vs. 7193 (8§) | 8 | 1.13 (1.00, 1.27) | 0.043 | 51 (0, 97) | 0.045    | 0.88 | 1.00 | 1.00 | 1.00 | 1.00 | 1.00 |
| CHEK2        | 1100delC  | 2417 vs. 3615 (4)  | 4 | 1.66 (1.01, 2.75) | 0.047 | 0 (0, 83)  | 8.35E-01 | 0.92 | 0.98 | 1.00 | 1.00 | 1.00 | 1.00 |

\* Includes GWAS data from SOCCS

§ Includes GWAS data from Ontario

\*\* Tomlinson 2008 was based on 10 samples

Supplementary Table S4. The Bayesian false-discovery probabilities (BFDP) for recessive model.

| Gene         | Variant      | Cases vs. controls<br>(number of samples) | N  | RECESSIVE MODEL   |          |                         |          |          |          |          |          |          |          |
|--------------|--------------|-------------------------------------------|----|-------------------|----------|-------------------------|----------|----------|----------|----------|----------|----------|----------|
|              |              |                                           |    | Effect size       |          | Heterogeneity           |          | BFDP     |          |          |          |          |          |
|              |              |                                           |    | OR (95% CI)       | P value  | I <sup>2</sup> (95% CI) | P value  | 0.05     | 0.01     | 1.00E-03 | 1.00E-04 | 1.00E-06 | 1.00E-07 |
| 8q24         | rs10505477   | 18562 vs. 20132 (14)                      | 14 | 1.16 (1.10, 1.23) | 4.06E-07 | 35 (0, 74)              | 0.092    | 7.59E-04 | 3.94E-03 | 0.04     | 0.29     | 0.98     | 1.00     |
| 10p14        | rs10795668   | 16763 vs. 18302 (16*)                     | 16 | 0.83 (0.77, 0.89) | 4.77E-07 | 11 (0, 70)              | 0.332    | 1.88E-04 | 9.81E-04 | 0.01     | 0.09     | 0.91     | 0.99     |
|              | rs1862748    | 17436 vs. 18418(11)                       | 11 | 0.83(0.77,0.90)   | 1.59E-06 | 2(0,68)                 | 0.427    | 0.01     | 0.03     | 0.22     | 0.74     | 1.00     | 1.00     |
| 11q23.1      | rs3802842    | 22320 vs. 22965 (20*)                     | 20 | 1.24 (1.13, 1.35) | 3.62E-06 | 45 (5, 86)              | 0.017    | 7.04E-04 | 3.66E-03 | 0.04     | 0.27     | 0.97     | 1.00     |
|              | rs355527     | 13539 vs. 14375(9)                        | 9  | 1.18(1.09,1.27)   | 3.54E-05 | 0(0,94)                 | 0.458    | 0.01     | 0.04     | 0.31     | 0.82     | 1.00     | 1.00     |
| 8q24         | rs6983267    | 51730 vs. 53589 (34*)                     | 34 | 1.16 (1.08, 1.25) | 4.92E-05 | 79 (66, 89)             | 2.80E-18 | 0.06     | 0.26     | 0.78     | 0.97     | 1.00     | 1.00     |
| miR          | rs895819     | 1322 vs. 1641(4)                          | 4  | 1.50(1.23,1.83)   | 6.32E-05 | 1(0,96)                 | 0.385    | 0.04     | 0.70     | 0.96     | 1.00     | 1.00     | 1.00     |
| MTHFR        | rs1801133    | 43652 vs. 60883(94§**)                    | 93 | 0.87(0.81,0.93)   | 7.36E-05 | 56(63,86)               | 6.79E-11 | 0.00     | 0.16     | 0.65     | 0.95     | 1.00     | 1.00     |
| SMAD7        | rs12953717   | 28006 vs. 26539 (13*)                     | 13 | 1.17 (1.08, 1.26) | 8.34E-05 | 45 (0, 94)              | 0.041    | 0.02     | 0.57     | 0.93     | 0.99     | 1.00     | 1.00     |
|              | rs4951291    | 15835 vs. 16724(9*)                       | 9  | 0.74(0.62,0.87)   | 2.72E-04 | 0(0,69)                 | 0.616    | 0.14     | 0.46     | 0.90     | 0.99     | 1.00     | 1.00     |
| 20p12.3      | rs961253     | 22971 vs. 25270 (14*)                     | 13 | 1.14 (1.06, 1.22) | 0.001    | 36 (0, 96)              | 0.098    | 0.10     | 0.36     | 0.85     | 0.98     | 1.00     | 1.00     |
| GSTT1        | Null variant | 19133 vs. 27821 (56)                      | 53 | 1.17 (1.07, 1.28) | 0.001    | 70 (71, 90)             | 1.62E-15 | 0.24     | 0.94     | 0.99     | 0.99     | 1.00     | 1.00     |
| TP73         | G4C14        | 858 vs. 1173(4)                           | 4  | 1.75(1.23,2.48)   | 0.002    | 0(0,94)                 | 0.513    | 0.63     | 0.90     | 0.99     | 1.00     | 1.00     | 1.00     |
| PPAR-gamma   | rs9858822    | 2152 vs. 2630 (5)                         | 2  | 1.69 (1.19, 2.39) | 0.003    | 0 (0, 98)               | 0.801    | 0.70     | 0.92     | 0.99     | 1.00     | 1.00     | 1.00     |
| IGF1         | rs35767      | 2792 vs. 4988 (3)                         | 3  | 0.75 (0.62, 0.91) | 0.003    | 0 (0, 97)               | 0.567    | 0.58     | 0.88     | 0.99     | 1.00     | 1.00     | 1.00     |
| TGFB1        | rs1800469    | 4021 vs. 6024(10)                         | 10 | 0.84 (0.74,0.94)  | 0.003    | 0(0,75)                 | 0.527    | 0.19     | 0.93     | 0.99     | 1.00     | 1.00     | 1.00     |
|              | rs4951039    | 13791 vs. 14288(7*)                       | 7  | 0.78(0.66,0.93)   | 0.005    | 0(0,68)                 | 0.620    | 0.65     | 0.91     | 0.99     | 1.00     | 1.00     | 1.00     |
| 9p24         | rs719725     | 13513 vs. 14999 (14)                      | 14 | 1.09 (1.02, 1.15) | 0.006    | 29 (0, 75)              | 0.148    | 0.52     | 0.85     | 0.98     | 1.00     | 1.00     | 1.00     |
| MSH2         | rs4608577    | 4308 vs. 4011(3*)                         | 3  | 0.72(0.56,0.92)   | 0.008    | 0(0,95)                 | 0.648    | 0.75     | 0.94     | 0.99     | 1.00     | 1.00     | 1.00     |
| MTHFR        | rs1801131    | 23523 vs. 35193(57§)                      | 57 | 0.91(0.84, 0.98)  | 0.010    | 23(0,62)                | 0.064    | 0.68     | 0.99     | 0.99     | 1.00     | 1.00     | 1.00     |
| PARP1        | rs1136410    | 7002 vs. 8328(7*)                         | 7  | 1.23(1.05,1.44)   | 0.012    | 0(0,92)                 | 0.475    | 0.75     | 0.94     | 0.99     | 1.00     | 1.00     | 1.00     |
| ABCB1 (MDR1) | rs1045642    | 7537 vs. 8396 (16)                        | 16 | 0.89 (0.81, 0.97) | 0.012    | 18 (0, 78)              | 0.248    | 0.76     | 0.94     | 0.99     | 1.00     | 1.00     | 1.00     |
| ADIPOR1      | rs1342387    | 2472 vs. 2848 (5*)                        | 5  | 0.84 (0.73, 0.96) | 0.012    | 0 (0, 62)               | 0.900    | 0.76     | 0.94     | 0.99     | 1.00     | 1.00     | 1.00     |
| CRP          | rs1800947    | 2853 vs. 3381(3)                          | 2  | 3.95(1.35,11.56)  | 0.012    | 7(0,99)                 | 0.301    | 0.93     | 0.99     | 1.00     | 1.00     | 1.00     | 1.00     |
| CYP1A1       | rs1048943    | 9661 vs. 11774 (19§)                      | 18 | 1.26 (1.04, 1.52) | 0.016    | 0 (0, 55)               | 0.456    | 0.80     | 1.00     | 1.00     | 1.00     | 1.00     | 1.00     |
| PTGS2/COX2   | rs20417      | 7785 vs. 11371(18)                        | 17 | 1.24(1.04,1.47)   | 0.016    | 0(0,46)                 | 0.928    | 0.78     | 0.99     | 1.00     | 1.00     | 1.00     | 1.00     |
| MUTYH        | rs34612342   | 28180 vs. 20923(19*)                      | 7  | 3.40(1.22,9.48)   | 0.019    | 0(0,0)                  | 0.998    | 0.93     | 0.99     | 1.00     | 1.00     | 1.00     | 1.00     |
| MTRR         | rs10380      | 9022 vs. 10910 (7*)                       | 6  | 1.38 (1.04, 1.82) | 0.025    | 0 (0, 90)               | 0.560    | 0.85     | 0.97     | 1.00     | 1.00     | 1.00     | 1.00     |
| XRCC1        | rs25487      | 13017 vs. 18166(37)                       | 36 | 1.17(1.02,1.34)   | 0.025    | 59(39,80)               | 3.14E-06 | 0.85     | 1.00     | 1.00     | 1.00     | 1.00     | 1.00     |
|              | rs7259371    | 15762 vs. 16700(9*)                       | 9  | 0.85(0.73,0.98)   | 0.027    | 17(0,86)                | 0.295    | 0.86     | 0.97     | 1.00     | 1.00     | 1.00     | 1.00     |
| TGFB1        | rs4803455    | 3747 vs. 4513 (3*)                        | 3  | 1.12 (1.01, 1.24) | 0.027    | 0 (0, 80)               | 0.845    | 0.89     | 0.98     | 1.00     | 1.00     | 1.00     | 1.00     |
| CRP          | rs1205       | 3037 vs. 9333(4)                          | 4  | 1.18(1.02,1.37)   | 0.027    | 0(0,94)                 | 0.431    | 0.87     | 0.97     | 1.00     | 1.00     | 1.00     | 1.00     |
| GH1          | rs2665802    | 3275 vs. 3848(7)                          | 7  | 0.83(0.71,0.98)   | 0.028    | 37(0,95)                | 0.144    | 0.86     | 0.97     | 1.00     | 1.00     | 1.00     | 1.00     |
| ADH1B        | rs1229984    | 4449 vs. 6995(9)                          | 9  | 1.23(1.02,1.48)   | 0.028    | 0(0,70)                 | 0.493    | 0.86     | 1.00     | 1.00     | 1.00     | 1.00     | 1.00     |
| VEGF         | rs699947     | 4497 vs. 5334 (10*)                       | 10 | 1.14 (1.01, 1.29) | 0.029    | 14 (0, 89)              | 0.317    | 0.90     | 0.98     | 1.00     | 1.00     | 1.00     | 1.00     |
| MSH3         | rs184967     | 8151 vs. 10103(4*)                        | 4  | 1.23(1.02,1.49)   | 0.031    | 0(0,91)                 | 0.702    | 0.88     | 0.97     | 1.00     | 1.00     | 1.00     | 1.00     |
| LIPC         | rs6083       | 7667 vs. 7980(4*)                         | 4  | 0.89(0.80,0.99)   | 0.033    | 22(0,94)                | 0.278    | 0.90     | 0.98     | 1.00     | 1.00     | 1.00     | 1.00     |
| VDR          | rs1544410    | 14789 vs. 15922 (16*)                     | 16 | 0.81 (0.67, 0.98) | 0.033    | 85 (77, 89)             | 1.08E-14 | 0.87     | 0.97     | 1.00     | 1.00     | 1.00     | 1.00     |
| VDR          | rs11568820   | 4001 vs. 4682 (5§)                        | 4  | 1.37 (1.02, 1.85) | 0.039    | 35 (0, 97)              | 0.203    | 0.89     | 0.98     | 1.00     | 1.00     | 1.00     | 1.00     |
| MMP1         | rs1799750    | 1660 vs. 2024(10)                         | 9  | 0.78(0.61,0.99)   | 0.041    | 21(0,68)                | 0.254    | 0.89     | 0.98     | 1.00     | 1.00     | 1.00     | 1.00     |
| RAD18        | rs373572     | 6560 vs. 6906(5*)                         | 5  | 1.23(1.01,1.49)   | 0.041    | 54(0,95)                | 0.067    | 0.88     | 0.97     | 1.00     | 1.00     | 1.00     | 1.00     |
| NAT2         | rs1799929    | 1861 vs. 1952 (5§)                        | 5  | 0.68 (0.47, 0.99) | 0.044    | 68(14, 98)              | 0.015    | 0.12     | 0.88     | 0.99     | 1.00     | 1.00     | 1.00     |
| HPGD         | rs8752       | 3968 vs. 4830(3*)                         | 3  | 1.12(1.00,1.26)   | 0.047    | 6(0,97)                 | 0.345    | 0.93     | 0.99     | 1.00     | 1.00     | 1.00     | 1.00     |

\* Includes GWAS data from SOCCS

§ Includes GWAS data from Ontario

\*\* Tomlinson 2008 was based on 10 samples

Supplementary Table S5. Validation test for allelic model with meta-GWAS of GECCO, CORECT and CCRF.

| rsid        | SNP_Name         | Effect allele | Other allele | Direction | Meta-beta | Meta-se | Meta-pval | Meta-power | GECCO_beta | GECCO_se | GECCO_pval | GECCO_R2 Imputation | CORECT_beta | CORECT_se | CORECT_pval | CORECT_R2 Imputation |
|-------------|------------------|---------------|--------------|-----------|-----------|---------|-----------|------------|------------|----------|------------|---------------------|-------------|-----------|-------------|----------------------|
| rs6983267   | 8:128413305_G/T  | t             | g            | --        | -0.139    | 0.012   | 1.14E-30  | 1.00       | -0.130     | 0.018    | 1.36E-12   | 0.972               | -0.145      | 0.016     | 9.64E-20    | 1.011                |
| rs4939827   | 18:46453463_T/C  | t             | c            | ++        | 0.139     | 0.012   | 3.28E-30  | 0.95       | 0.117      | 0.018    | 1.39E-10   | 0.988               | 0.156       | 0.016     | 9.05E-22    | 1.047                |
| rs10505477  | 8:128407443_A/G  | a             | g            | ++        | 0.136     | 0.012   | 1.61E-29  | 1.00       | 0.131      | 0.018    | 1.02E-12   | 0.959               | 0.140       | 0.016     | 2.10E-18    | 1.008                |
| rs12953717  | 18:46453929_C/T  | t             | c            | ++        | 0.116     | 0.012   | 2.09E-21  | 1.00       | 0.110      | 0.018    | 2.35E-09   | 0.970               | 0.121       | 0.016     | 1.34E-13    | 1.036                |
| rs16892766  | 8:117630683_A/C  | a             | c            | --        | -0.178    | 0.021   | 4.93E-17  | 1.00       | -0.202     | 0.033    | 6.62E-10   | 0.983               | -0.160      | 0.028     | 8.28E-09    | 1.031                |
| rs3802842   | 11:111171709_C/A | a             | c            | --        | -0.100    | 0.013   | 5.34E-14  | 1.00       | -0.104     | 0.020    | 3.63E-07   | 0.948               | -0.097      | 0.017     | 2.88E-08    | 1.011                |
| rs4464148   | 18:46459032_T/C  | t             | c            | --        | -0.093    | 0.013   | 1.90E-12  | 1.00       | -0.070     | 0.020    | 4.01E-04   | 0.961               | -0.112      | 0.018     | 3.30E-10    | 1.063                |
| rs355527    | 20:6388068_T/C   | t             | c            | ++        | 0.091     | 0.013   | 3.29E-12  | 1.00       | 0.088      | 0.019    | 4.28E-06   | 1.003               | 0.093       | 0.018     | 1.65E-07    | 1.037                |
| rs1801155   | 5:112175211_T/A  | a             | t            | ++        | 0.577     | 0.088   | 4.84E-11  | 1.00       | 0.387      | 0.208    | 0.06291    | 0.653               | 0.618       | 0.097     | 1.69E-10    | 1.007                |
| rs961253    | 20:6404281_C/A   | a             | c            | ++        | 0.079     | 0.013   | 6.08E-10  | 1.00       | 0.077      | 0.019    | 4.05E-05   | 0.988               | 0.080       | 0.017     | 3.62E-06    | 1.045                |
| rs10795668  | 10:8701219_G/A   | a             | g            | --        | -0.066    | 0.013   | 2.63E-07  | 1.00       | -0.033     | 0.019    | 0.087      | 0.993               | -0.091      | 0.017     | 9.06E-08    | 1.007                |
| rs2736100   | 5:1286516_C/A    | a             | c            | ++        | 0.062     | 0.012   | 3.23E-07  | 1.00       | 0.065      | 0.019    | 0.001      | 0.922               | 0.061       | 0.016     | 1.56E-04    | 1.008                |
| rs7259371   | 19:33534641_G/A  | a             | g            | --        | -0.067    | 0.015   | 3.62E-06  | 1.00       | -0.063     | 0.023    | 0.006      | 1.003               | -0.070      | 0.019     | 1.77E-04    | 1.097                |
| rs1862748   | 16:68832943_C/T  | t             | c            | --        | -0.049    | 0.013   | 1.75E-04  | 1.00       | -0.065     | 0.020    | 0.001      | 0.992               | -0.036      | 0.017     | 0.038       | 1.027                |
| rs719725    | 9:6365683_A/C    | a             | c            | ++        | 0.043     | 0.012   | 4.25E-04  | 1.00       | 0.064      | 0.019    | 0.001      | 0.983               | 0.027       | 0.016     | 0.094       | 1.002                |
| rs8752      | 4:175412477_C/T  | t             | c            | --        | -0.038    | 0.012   | 0.002     | 0.99       | -0.020     | 0.018    | 0.280      | 0.983               | -0.052      | 0.016     | 0.001       | 1.038                |
| rs1800469   | 19:41860296_A/G  | a             | g            | --        | -0.039    | 0.013   | 0.002     | 1.00       | -0.022     | 0.019    | 0.258      | 0.999               | -0.052      | 0.017     | 0.002       | 1.033                |
| rs7849      | 10:102122603_T/C | t             | c            | ++        | 0.044     | 0.015   | 0.004     | 1.00       | 0.059      | 0.024    | 0.013      | 0.983               | 0.033       | 0.020     | 0.096       | 1.007                |
| rs20417     | 1:186650321_C/G  | c             | g            | --        | -0.043    | 0.016   | 0.008     | 1.00       | -0.049     | 0.024    | 0.045      | 0.988               | -0.039      | 0.022     | 0.080       | 1.019                |
| rs36053993  | 1:45797228_C/T   | t             | c            | +         | 0.198     | 0.088   | 0.024     | 1.00       | -0.001     | 0.118    | 0.993      | 0.835               | 0.447       | 0.132     | 0.001       | 0.797                |
| rs928554    | 14:64694195_C/T  | t             | c            | --        | -0.026    | 0.012   | 0.029     | 1.00       | -0.026     | 0.018    | 0.148      | 0.995               | -0.026      | 0.016     | 0.103       | 1.005                |
| rs4803455   | 19:41851509_C/A  | a             | c            | ++        | 0.027     | 0.013   | 0.031     | 1.00       | 0.035      | 0.020    | 0.079      | 0.816               | 0.022       | 0.016     | 0.178       | 1.002                |
| rs11568820  | 12:48302545_C/T  | t             | c            | +         | 0.031     | 0.015   | 0.037     | 1.00       | 0.080      | 0.023    | 0.000      | 0.967               | -0.004      | 0.019     | 0.840       | 1.039                |
| rs10380     | 5:7897191_C/T    | t             | c            | --        | -0.035    | 0.019   | 0.068     | 0.74       | -0.024     | 0.030    | 0.429      | 0.997               | -0.043      | 0.025     | 0.086       | 0.990                |
| rs2665802   | 17:61995030_A/T  | a             | t            | ++        | 0.021     | 0.013   | 0.090     | 1.00       | 0.020      | 0.019    | 0.307      | 0.878               | 0.022       | 0.016     | 0.174       | 0.972                |
| rs1042838   | 11:100933412_C/A | a             | c            | --        | -0.027    | 0.017   | 0.108     | 0.99       | -0.006     | 0.025    | 0.822      | 1.000               | -0.044      | 0.022     | 0.049       | 1.033                |
| rs9344      | 11:69462910_G/A  | a             | g            | ++        | 0.021     | 0.013   | 0.116     | 1.00       | 0.043      | 0.021    | 0.035      | 0.770               | 0.005       | 0.017     | 0.769       | 0.940                |
| rs1799853   | 10:96702047_C/T  | t             | c            | ++        | 0.028     | 0.019   | 0.128     | 0.89       | 0.019      | 0.027    | 0.469      | 0.997               | 0.036       | 0.026     | 0.157       | 0.983                |
| rs1048943   | 15:75012985_T/C  | t             | c            | --        | -0.043    | 0.029   | 0.133     | 1.00       | -0.077     | 0.051    | 0.129      | 0.921               | -0.027      | 0.034     | 0.429       | 1.075                |
| rs1544410   | 12:48239835_C/T  | t             | c            | --        | -0.018    | 0.013   | 0.143     | 1.00       | -0.017     | 0.018    | 0.354      | 0.998               | -0.019      | 0.017     | 0.255       | 1.066                |
| rs3803185   | 13:50205025_T/C  | t             | c            | +         | -0.017    | 0.012   | 0.155     | 1.00       | 0.002      | 0.018    | 0.900      | 0.974               | -0.033      | 0.016     | 0.042       | 1.051                |
| rs2066844   | 16:50745926_C/T  | t             | c            | ++        | 0.044     | 0.032   | 0.168     | 1.00       | 0.059      | 0.043    | 0.170      | 0.901               | 0.025       | 0.047     | 0.589       | 0.920                |
| rs4444903   | 4:110834110_A/G  | a             | g            | --        | -0.017    | 0.012   | 0.175     | 1.00       | -0.003     | 0.019    | 0.889      | 0.973               | -0.028      | 0.016     | 0.092       | 1.042                |
| rs34612342* | 1:45798475_T/C   | t             | c            | ?-        | -1.395    | 1.074   | 0.194     | 1.00       | -0.041     | 0.582    | 0.944      | 0.163               | -1.395      | 1.074     | 0.194       | 0.097                |
| rs1229984   | 4:100239319_T/C  | t             | c            | --        | -0.031    | 0.025   | 0.199     | 0.93       | -0.076     | 0.050    | 0.131      | 0.815               | -0.018      | 0.028     | 0.530       | 1.200                |
| rs1342387   | 1:202914356_T/C  | t             | c            | +         | -0.016    | 0.012   | 0.201     | 1.00       | 0.004      | 0.018    | 0.821      | 0.991               | -0.031      | 0.016     | 0.055       | 0.958                |
| rs1801133   | 1:11856378_G/A   | a             | g            | --        | -0.016    | 0.013   | 0.220     | 0.93       | -0.003     | 0.021    | 0.889      | 0.826               | -0.024      | 0.017     | 0.144       | 1.013                |
| rs1205      | 1:159682233_C/T  | t             | c            | ++        | 0.014     | 0.013   | 0.254     | 0.99       | 0.020      | 0.019    | 0.292      | 1.002               | 0.010       | 0.017     | 0.553       | 1.041                |
| rs4608577   | 2:47703984_T/G   | t             | g            | +         | -0.016    | 0.016   | 0.310     | 0.98       | -0.041     | 0.024    | 0.081      | 0.993               | 0.004       | 0.021     | 0.844       | 1.005                |
| rs1801280   | 8:18257854_T/C   | t             | c            | --        | -0.012    | 0.012   | 0.330     | 0.14       | -0.022     | 0.018    | 0.225      | 0.994               | -0.003      | 0.017     | 0.844       | 1.094                |
| rs1800947   | 1:159683438_C/G  | c             | g            | --        | -0.025    | 0.026   | 0.333     | 0.24       | -0.001     | 0.042    | 0.989      | 0.766               | -0.041      | 0.033     | 0.222       | 0.982                |
| rs2241766   | 3:186570892_T/G  | t             | g            | +         | 0.017     | 0.019   | 0.381     | 1.00       | -0.009     | 0.029    | 0.746      | 0.961               | 0.036       | 0.025     | 0.148       | 0.861                |
| rs1128503   | 7:87179601_A/G   | a             | g            | ++        | 0.010     | 0.012   | 0.390     | 1.00       | 0.010      | 0.018    | 0.576      | 0.996               | 0.011       | 0.016     | 0.514       | 1.019                |
| rs1569686   | 20:31367079_G/T  | t             | g            | +         | -0.011    | 0.012   | 0.400     | 1.00       | -0.024     | 0.018    | 0.197      | 0.999               | 0.001       | 0.017     | 0.965       | 1.113                |
| rs1799929   | 8:18257994_C/T   | t             | c            | +         | 0.010     | 0.013   | 0.410     | 1.00       | 0.025      | 0.018    | 0.176      | 0.989               | -0.002      | 0.017     | 0.891       | 1.087                |
| rs1202168   | 7:87195962_G/A   | a             | g            | ++        | 0.010     | 0.012   | 0.420     | 0.99       | 0.014      | 0.018    | 0.434      | 0.988               | 0.006       | 0.017     | 0.704       | 0.977                |
| rs1799930   | 8:18258103_G/A   | a             | g            | +         | -0.010    | 0.013   | 0.433     | 0.99       | -0.024     | 0.020    | 0.232      | 1.005               | 0.000       | 0.018     | 0.989       | 1.012                |
| rs9282564   | 7:87229440_T/C   | t             | c            | --        | -0.015    | 0.019   | 0.436     | 0.95       | -0.046     | 0.035    | 0.196      | 0.748               | -0.002      | 0.023     | 0.933       | 1.145                |

|           |                   |   |   |    |        |       |       |      |        |       |       |       |        |       |       |       |
|-----------|-------------------|---|---|----|--------|-------|-------|------|--------|-------|-------|-------|--------|-------|-------|-------|
| rs373572  | 3:8955389_C/T     | t | c | +- | 0.010  | 0.013 | 0.437 | 1.00 | 0.043  | 0.020 | 0.033 | 0.996 | -0.015 | 0.018 | 0.409 | 1.076 |
| rs35767   | 12:102875569_A/G  | a | g | +- | 0.011  | 0.016 | 0.490 | 0.97 | 0.030  | 0.025 | 0.227 | 0.970 | -0.002 | 0.020 | 0.919 | 1.027 |
| rs2292832 | 2:241395503_T/C   | t | c | -- | -0.010 | 0.015 | 0.493 | 0.99 | -0.015 | 0.020 | 0.457 | 0.922 | -0.005 | 0.021 | 0.828 | 0.688 |
| rs2240308 | 17:63554591_G/A   | a | g | ++ | 0.009  | 0.013 | 0.501 | 0.99 | 0.015  | 0.023 | 0.518 | 0.650 | 0.006  | 0.016 | 0.712 | 1.028 |
| rs1799750 | 11:102670495_TC/T | t | c | +- | -0.008 | 0.013 | 0.502 | 1.00 | 0.014  | 0.019 | 0.480 | 0.885 | -0.024 | 0.016 | 0.138 | 0.937 |
| rs1800566 | 16:69745145_G/A   | a | g | ++ | 0.009  | 0.015 | 0.536 | 1.00 | 0.016  | 0.023 | 0.493 | 1.000 | 0.004  | 0.019 | 0.817 | 1.044 |
| rs1800562 | 6:26093141_G/A    | a | g | +- | -0.016 | 0.028 | 0.562 | 0.99 | 0.016  | 0.038 | 0.682 | 0.971 | -0.051 | 0.040 | 0.202 | 1.022 |
| rs909460  | 18:55254310_C/T   | t | c | -- | -0.088 | 0.165 | 0.596 | 1.00 | -0.187 | 0.337 | 0.579 | 0.837 | -0.056 | 0.189 | 0.767 | 0.815 |
| rs25487   | 19:44055726_T/C   | t | c | -- | -0.007 | 0.013 | 0.598 | 1.00 | -0.007 | 0.020 | 0.730 | 0.915 | -0.007 | 0.017 | 0.690 | 1.008 |
| rs26779   | 5:80059203_C/T    | t | c | -+ | -0.006 | 0.012 | 0.640 | 0.99 | -0.029 | 0.018 | 0.115 | 1.001 | 0.013  | 0.016 | 0.440 | 0.998 |
| rs184967  | 5:80149981_A/G    | a | g | +- | -0.008 | 0.017 | 0.652 | 0.99 | 0.012  | 0.024 | 0.615 | 1.012 | -0.026 | 0.023 | 0.270 | 1.015 |
| rs6083    | 15:58838010_A/G   | a | g | -+ | 0.006  | 0.014 | 0.667 | 0.93 | -0.001 | 0.020 | 0.974 | 0.886 | 0.012  | 0.019 | 0.531 | 0.855 |
| rs9858822 | 3:12411238_A/C    | a | c | +- | 0.055  | 0.128 | 0.668 | 1.00 | 0.278  | 0.234 | 0.235 | 0.916 | -0.040 | 0.152 | 0.794 | 0.987 |
| rs895819  | 19:13947292_T/C   | t | c | ++ | 0.005  | 0.013 | 0.696 | 1.00 | 0.004  | 0.020 | 0.851 | 0.921 | 0.006  | 0.018 | 0.723 | 0.951 |
| rs699947  | 6:43736389_A/C    | a | c | -- | -0.004 | 0.012 | 0.744 | 1.00 | -0.008 | 0.018 | 0.668 | 0.960 | -0.001 | 0.017 | 0.961 | 0.971 |
| rs4951291 | 1:204006538_T/C   | t | c | +- | 0.006  | 0.024 | 0.808 | 0.99 | 0.029  | 0.028 | 0.290 | 0.952 | -0.058 | 0.045 | 0.204 | 0.851 |
| rs1801131 | 1:11854476_T/G    | t | g | -- | -0.003 | 0.013 | 0.824 | 0.38 | -0.003 | 0.020 | 0.880 | 0.969 | -0.003 | 0.017 | 0.870 | 1.012 |
| rs4951039 | 1:204006597_G/A   | a | g | -+ | -0.005 | 0.024 | 0.830 | 0.99 | -0.028 | 0.028 | 0.311 | 0.951 | 0.057  | 0.045 | 0.212 | 0.853 |
| rs1950902 | 14:64882380_A/G   | a | g | +- | -0.003 | 0.016 | 0.844 | 0.98 | 0.004  | 0.024 | 0.870 | 0.985 | -0.008 | 0.021 | 0.686 | 1.007 |
| rs2228000 | 3:14199887_G/A    | a | g | -+ | 0.002  | 0.014 | 0.871 | 0.13 | -0.016 | 0.021 | 0.444 | 0.997 | 0.016  | 0.018 | 0.375 | 1.011 |
| rs1136410 | 1:226555302_A/G   | a | g | +- | -0.001 | 0.016 | 0.970 | 0.94 | 0.029  | 0.025 | 0.250 | 0.980 | -0.020 | 0.020 | 0.321 | 1.055 |
| rs17655   | 13:103528002_G/C  | c | g | +- | 0.000  | 0.014 | 0.977 | 0.99 | 0.026  | 0.022 | 0.226 | 1.004 | -0.020 | 0.018 | 0.286 | 1.064 |
| rs1045642 | 7:87138645_A/G    | a | g | +- | 0.000  | 0.012 | 0.987 | 0.99 | 0.015  | 0.018 | 0.410 | 0.978 | -0.012 | 0.016 | 0.454 | 1.026 |

\* rs34612342 was dropped due to low imputation quality.

Supplementary Table S6. Validation test for dominant model with meta-GWAS of GECCO, CORECT and CCRF.

| rsid        | SNP_Name         | Effect allele | Other allele | Direction | Meta-beta | Meta-se | Meta-pval | Meta-power | GECCO_beta | GECCO_se | GECCO_pval | GECCO_R2 Imputation | CORECT_beta | CORECT_se | CORECT_pval | CORECT_R2 Imputation |
|-------------|------------------|---------------|--------------|-----------|-----------|---------|-----------|------------|------------|----------|------------|---------------------|-------------|-----------|-------------|----------------------|
| rs4939827   | 18:46453463_T/C  | t             | c            | ++        | 0.181     | 0.019   | 8.84E-21  | 0.94       | 0.163      | 0.029    | 1.08E-08   | 0.988               | 0.196       | 0.026     | 9.62E-14    | 1.047                |
| rs6983267   | 8:128413305_G/T  | t             | g            | --        | -0.165    | 0.019   | 7.17E-18  | 1.00       | -0.140     | 0.029    | 1.48E-06   | 0.972               | -0.184      | 0.026     | 4.78E-13    | 1.011                |
| rs10505477  | 8:128407443_A/G  | a             | g            | ++        | 0.166     | 0.020   | 1.82E-17  | 1.00       | 0.154      | 0.030    | 2.35E-07   | 0.959               | 0.174       | 0.026     | 1.26E-11    | 1.008                |
| rs16892766  | 8:117630683_A/C  | a             | c            | --        | -0.193    | 0.023   | 3.68E-17  | 0.93       | -0.217     | 0.035    | 5.39E-10   | 0.983               | -0.175      | 0.030     | 8.29E-09    | 1.031                |
| rs12953717  | 18:46453929_C/T  | t             | c            | ++        | 0.142     | 0.019   | 1.75E-14  | 1.00       | 0.138      | 0.028    | 1.13E-06   | 0.970               | 0.144       | 0.024     | 3.10E-09    | 1.036                |
| rs3802842   | 11:111171709_C/A | a             | c            | --        | -0.118    | 0.017   | 4.86E-12  | 1.00       | -0.118     | 0.026    | 7.50E-06   | 0.948               | -0.119      | 0.023     | 1.43E-07    | 1.011                |
| rs1801155   | 5:112175211_T/A  | a             | t            | ++        | 0.594     | 0.091   | 6.28E-11  | 1.00       | 0.420      | 0.215    | 0.051      | 0.653               | 0.631       | 0.100     | 2.94E-10    | 1.007                |
| rs4464148   | 18:46459032_T/C  | t             | c            | --        | -0.099    | 0.018   | 1.73E-08  | 1.00       | -0.086     | 0.026    | 0.001      | 0.961               | -0.110      | 0.024     | 3.73E-06    | 1.063                |
| rs355527    | 20:6388068_T/C   | t             | c            | ++        | 0.096     | 0.017   | 2.07E-08  | 1.00       | 0.088      | 0.026    | 0.001      | 1.003               | 0.103       | 0.023     | 8.04E-06    | 1.037                |
| rs10795668  | 10:8701219_G/A   | a             | g            | --        | -0.089    | 0.017   | 1.52E-07  | 1.00       | -0.049     | 0.026    | 0.053      | 0.993               | -0.119      | 0.023     | 1.20E-07    | 1.007                |
| rs961253    | 20:6404281_C/A   | a             | c            | ++        | 0.083     | 0.017   | 1.74E-06  | 1.00       | 0.069      | 0.026    | 0.008      | 0.988               | 0.095       | 0.023     | 5.22E-05    | 1.045                |
| rs7259371   | 19:33534641_G/A  | a             | g            | --        | -0.077    | 0.018   | 1.71E-05  | 0.99       | -0.072     | 0.027    | 0.008      | 1.003               | -0.082      | 0.024     | 7.19E-04    | 1.097                |
| rs2736100   | 5:1286516_C/A    | a             | c            | ++        | 0.086     | 0.020   | 1.72E-05  | 0.99       | 0.090      | 0.031    | 0.004      | 0.922               | 0.083       | 0.026     | 0.001       | 1.008                |
| rs7849      | 10:102122603_T/C | t             | c            | ++        | 0.056     | 0.018   | 0.002     | 1.00       | 0.067      | 0.027    | 0.015      | 0.983               | 0.048       | 0.024     | 0.040       | 1.007                |
| rs719725    | 9:6365683_A/C    | a             | c            | ++        | 0.049     | 0.017   | 0.004     | 1.00       | 0.078      | 0.026    | 0.003      | 0.983               | 0.027       | 0.023     | 0.234       | 1.002                |
| rs20417     | 1:186650321_C/G  | c             | g            | --        | -0.053    | 0.019   | 0.005     | 0.99       | -0.065     | 0.028    | 0.021      | 0.988               | -0.043      | 0.025     | 0.089       | 1.019                |
| rs1862748   | 16:68832943_C/T  | t             | c            | --        | -0.048    | 0.017   | 0.005     | 1.00       | -0.067     | 0.026    | 0.009      | 0.992               | -0.032      | 0.023     | 0.155       | 1.027                |
| rs1800469   | 19:41860296_A/G  | a             | g            | --        | -0.044    | 0.017   | 0.011     | 1.00       | -0.015     | 0.026    | 0.574      | 0.999               | -0.067      | 0.023     | 0.004       | 1.033                |
| rs8752      | 4:175412477_C/T  | t             | c            | --        | -0.046    | 0.018   | 0.012     | 1.00       | -0.007     | 0.027    | 0.810      | 0.983               | -0.077      | 0.024     | 0.002       | 1.038                |
| rs11568820  | 12:48302545_C/T  | t             | c            | ++        | 0.037     | 0.018   | 0.035     | 1.00       | 0.074      | 0.027    | 0.006      | 0.967               | 0.010       | 0.023     | 0.682       | 1.039                |
| rs1799853   | 10:96702047_C/T  | t             | c            | ++        | 0.039     | 0.021   | 0.058     | 0.96       | 0.021      | 0.030    | 0.490      | 0.997               | 0.056       | 0.029     | 0.049       | 0.983                |
| rs1544410   | 12:48239835_C/T  | t             | c            | --        | -0.033    | 0.018   | 0.067     | 1.00       | -0.039     | 0.027    | 0.146      | 0.998               | -0.028      | 0.024     | 0.251       | 1.066                |
| rs10380     | 5:7897191_C/T    | t             | c            | --        | -0.039    | 0.021   | 0.069     | 0.99       | -0.020     | 0.033    | 0.537      | 0.997               | -0.051      | 0.028     | 0.063       | 0.990                |
| rs1048943   | 15:75012985_T/C  | t             | c            | --        | -0.052    | 0.031   | 0.094     | 0.99       | -0.083     | 0.052    | 0.112      | 0.921               | -0.035      | 0.038     | 0.360       | 1.075                |
| rs1042838   | 11:100933412_C/A | a             | c            | --        | -0.031    | 0.019   | 0.101     | 0.15       | -0.006     | 0.028    | 0.831      | 1.000               | -0.053      | 0.026     | 0.042       | 1.033                |
| rs36053993  | 1:45797228_C/T   | t             | c            | +-        | 0.135     | 0.093   | 0.145     | 1.00       | -0.061     | 0.123    | 0.621      | 0.835               | 0.392       | 0.141     | 0.005       | 0.797                |
| rs3803185   | 13:50205025_T/C  | t             | c            | +-        | -0.028    | 0.020   | 0.170     | 0.99       | 0.010      | 0.029    | 0.742      | 0.974               | -0.061      | 0.028     | 0.028       | 1.051                |
| rs928554    | 14:64694195_C/T  | t             | c            | --        | -0.024    | 0.018   | 0.188     | 1.00       | -0.028     | 0.027    | 0.312      | 0.995               | -0.020      | 0.024     | 0.387       | 1.005                |
| rs2066844   | 16:50745926_C/T  | t             | c            | ++        | 0.043     | 0.033   | 0.192     | 0.98       | 0.045      | 0.045    | 0.319      | 0.901               | 0.041       | 0.049     | 0.399       | 0.920                |
| rs34612342* | 1:45798475_T/C   | t             | c            | ?-        | -1.394    | 1.075   | 0.195     | 0.82       | -0.040     | 0.583    | 0.945      | 0.163               | -1.394      | 1.075     | 0.195       | 0.097                |
| rs9344      | 11:69462910_G/A  | a             | g            | ++        | 0.027     | 0.021   | 0.197     | 1.00       | 0.063      | 0.033    | 0.053      | 0.770               | 0.002       | 0.027     | 0.938       | 0.940                |
| rs9282564   | 7:87229440_T/C   | t             | c            | --        | -0.031    | 0.025   | 0.214     | 0.58       | -0.055     | 0.039    | 0.160      | 0.748               | -0.015      | 0.032     | 0.652       | 1.145                |
| rs1800947   | 1:159683438_C/G  | c             | g            | --        | -0.033    | 0.028   | 0.233     | 1.00       | -0.007     | 0.045    | 0.878      | 0.766               | -0.049      | 0.035     | 0.164       | 0.982                |
| rs373572    | 3:8955389_C/T    | t             | c            | +-        | 0.020     | 0.017   | 0.245     | 1.00       | 0.056      | 0.026    | 0.029      | 0.996               | -0.010      | 0.023     | 0.673       | 1.076                |
| rs4803455   | 19:41851509_C/A  | a             | c            | +-        | 0.022     | 0.020   | 0.276     | 1.00       | 0.071      | 0.033    | 0.031      | 0.816               | -0.007      | 0.025     | 0.771       | 1.002                |
| rs1229984   | 4:100239319_T/C  | t             | c            | +-        | -0.032    | 0.030   | 0.292     | 1.00       | -0.107     | 0.054    | 0.047      | 0.815               | 0.002       | 0.036     | 0.955       | 1.200                |
| rs1202168   | 7:87195962_G/A   | a             | g            | ++        | 0.018     | 0.019   | 0.325     | 0.74       | 0.022      | 0.027    | 0.414      | 0.988               | 0.015       | 0.025     | 0.558       | 0.977                |
| rs1045642   | 7:87138645_A/G   | a             | g            | +-        | 0.019     | 0.020   | 0.326     | 1.00       | 0.045      | 0.029    | 0.123      | 0.978               | -0.002      | 0.027     | 0.934       | 1.026                |
| rs4444903   | 4:110834110_A/G  | a             | g            | +-        | -0.018    | 0.018   | 0.339     | 0.99       | 0.002      | 0.027    | 0.950      | 0.973               | -0.034      | 0.025     | 0.176       | 1.042                |
| rs1205      | 1:159682233_C/T  | t             | c            | ++        | 0.016     | 0.017   | 0.349     | 1.00       | 0.017      | 0.026    | 0.501      | 1.002               | 0.015       | 0.023     | 0.513       | 1.041                |
| rs1128503   | 7:87179601_A/G   | a             | g            | ++        | 0.017     | 0.018   | 0.354     | 1.00       | 0.016      | 0.027    | 0.560      | 0.996               | 0.018       | 0.024     | 0.470       | 1.019                |
| rs1799929   | 8:18257994_C/T   | t             | c            | ++        | 0.017     | 0.019   | 0.364     | 1.00       | 0.024      | 0.027    | 0.381      | 0.989               | 0.011       | 0.026     | 0.671       | 1.087                |
| rs2240308   | 17:63554591_G/A  | a             | g            | ++        | 0.019     | 0.022   | 0.375     | 0.99       | 0.023      | 0.038    | 0.541      | 0.650               | 0.017       | 0.027     | 0.513       | 1.028                |
| rs1136410   | 1:22655302_A/G   | a             | g            | +-        | 0.015     | 0.019   | 0.405     | 1.00       | 0.039      | 0.028    | 0.163      | 0.980               | -0.003      | 0.025     | 0.910       | 1.055                |
| rs4608577   | 2:47703984_T/G   | t             | g            | +-        | -0.015    | 0.018   | 0.416     | 1.00       | -0.040     | 0.027    | 0.138      | 0.993               | 0.006       | 0.024     | 0.812       | 1.005                |
| rs1800562   | 6:26093141_G/A   | a             | g            | +-        | -0.023    | 0.029   | 0.426     | 0.44       | 0.010      | 0.040    | 0.796      | 0.971               | -0.061      | 0.043     | 0.153       | 1.022                |
| rs2241766   | 3:186570892_T/G  | t             | g            | +-        | 0.016     | 0.021   | 0.446     | 0.33       | -0.016     | 0.032    | 0.615      | 0.961               | 0.042       | 0.028     | 0.138       | 0.861                |
| rs1801280   | 8:18257854_T/C   | t             | c            | --        | -0.014    | 0.019   | 0.461     | 0.21       | -0.012     | 0.028    | 0.657      | 0.994               | -0.015      | 0.026     | 0.553       | 1.094                |

|           |                   |   |   |    |        |       |       |      |        |       |          |       |        |       |       |       |
|-----------|-------------------|---|---|----|--------|-------|-------|------|--------|-------|----------|-------|--------|-------|-------|-------|
| rs1799750 | 11:102670495_TC/T | t | c | +- | -0.014 | 0.020 | 0.489 | 1.00 | 0.021  | 0.030 | 0.495    | 0.885 | -0.040 | 0.026 | 0.131 | 0.937 |
| rs1342387 | 1:202914356_T/C   | t | c | +- | 0.013  | 0.019 | 0.506 | 1.00 | 0.044  | 0.028 | 0.121    | 0.991 | -0.014 | 0.026 | 0.596 | 0.958 |
| rs1801133 | 1:11856378_G/A    | a | g | -- | -0.012 | 0.018 | 0.509 | 1.00 | -0.001 | 0.028 | 0.979    | 0.826 | -0.019 | 0.023 | 0.408 | 1.013 |
| rs1800566 | 16:69745145_G/A   | a | g | ++ | 0.010  | 0.018 | 0.575 | 1.00 | 0.014  | 0.027 | 0.600    | 1.000 | 0.007  | 0.024 | 0.774 | 1.044 |
| rs2292832 | 2:241395503_T/C   | t | c | -- | -0.010 | 0.019 | 0.601 | 0.88 | -0.016 | 0.026 | 0.527    | 0.922 | -0.003 | 0.027 | 0.927 | 0.688 |
| rs2665802 | 17:61995030_A/T   | a | t | -- | -0.009 | 0.018 | 0.624 | 1.00 | -0.015 | 0.028 | 0.607    | 0.878 | -0.005 | 0.024 | 0.837 | 0.972 |
| rs35767   | 12:102875569_A/G  | a | g | +- | 0.009  | 0.018 | 0.645 | 1.00 | 0.031  | 0.028 | 0.275    | 0.970 | -0.008 | 0.024 | 0.745 | 1.027 |
| rs9858822 | 3:12411238_A/C    | a | c | +- | 0.059  | 0.128 | 0.647 | 1.00 | 0.278  | 0.234 | 0.235    | 0.916 | -0.035 | 0.153 | 0.820 | 0.987 |
| rs909460  | 18:55254310_C/T   | t | c | -- | -0.074 | 0.169 | 0.661 | 1.00 | -0.104 | 0.361 | 0.773    | 0.837 | -0.066 | 0.191 | 0.731 | 0.815 |
| rs1801131 | 1:11854476_T/G    | t | g | -- | -0.007 | 0.017 | 0.680 | 0.99 | -0.007 | 0.026 | 0.779    | 0.969 | -0.007 | 0.023 | 0.763 | 1.012 |
| rs699947  | 6:43736389_A/C    | a | c | +- | 0.008  | 0.020 | 0.687 | 1.00 | 0.022  | 0.029 | 0.454    | 0.960 | -0.005 | 0.028 | 0.870 | 0.971 |
| rs6083    | 15:58838010_A/G   | a | g | -+ | 0.008  | 0.020 | 0.690 | 1.00 | -0.015 | 0.028 | 0.601    | 0.886 | 0.030  | 0.028 | 0.281 | 0.855 |
| rs184967  | 5:80149981_A/G    | a | g | +- | -0.008 | 0.019 | 0.694 | 0.99 | 0.023  | 0.028 | 0.412    | 1.012 | -0.035 | 0.026 | 0.188 | 1.015 |
| rs1799930 | 8:18258103_G/A    | a | g | -- | -0.006 | 0.017 | 0.711 | 0.07 | -0.012 | 0.025 | 0.633    | 1.005 | -0.002 | 0.023 | 0.944 | 1.012 |
| rs895819  | 19:13947292_T/C   | t | c | ++ | 0.006  | 0.018 | 0.750 | 1.00 | 0.004  | 0.027 | 0.882    | 0.921 | 0.007  | 0.023 | 0.769 | 0.951 |
| rs26779   | 5:80059203_C/T    | t | c | -+ | -0.005 | 0.018 | 0.765 | 0.99 | -0.025 | 0.026 | 0.352    | 1.001 | 0.010  | 0.023 | 0.673 | 0.998 |
| rs17655   | 13:103528002_G/C  | c | g | +- | -0.004 | 0.017 | 0.803 | 0.16 | 0.023  | 0.026 | 0.383    | 1.004 | -0.026 | 0.023 | 0.265 | 1.064 |
| rs25487   | 19:44055726_T/C   | t | c | ++ | 0.004  | 0.018 | 0.817 | 1.00 | 0.001  | 0.027 | 0.966    | 0.915 | 0.006  | 0.023 | 0.791 | 1.008 |
| rs2228000 | 3:14199887_G/A    | a | g | -+ | -0.003 | 0.017 | 0.873 | 0.77 | -0.008 | 0.026 | 0.765    | 0.997 | 0.001  | 0.023 | 0.959 | 1.011 |
| rs1950902 | 14:64882380_A/G   | a | g | +- | -0.002 | 0.018 | 0.907 | 0.05 | 0.004  | 0.027 | 0.887    | 0.985 | -0.007 | 0.024 | 0.779 | 1.007 |
| rs1569686 | 20:31367079_G/T   | t | g | -+ | -0.001 | 0.018 | 0.972 | 0.57 | -0.016 | 0.026 | 0.557    | 0.999 | 0.013  | 0.025 | 0.610 | 1.113 |
| rs4951291 | 1:204006538_T/C   | t | c | +- | 0.001  | 0.026 | 0.972 | 1.00 | 0.026  | 0.031 | 0.401    | 0.952 | -0.064 | 0.049 | 0.197 | 0.851 |
| rs4951039 | 1:204006597_G/A   | a | g | -+ | 0.000  | 0.026 | 0.996 | 0.99 | -0.024 | 0.031 | 0.426555 | 0.951 | 0.063  | 0.049 | 0.203 | 0.853 |

\* rs34612342 was dropped due to low imputation quality.

Supplementary Table S7. Validation test for recessive model with meta-GWAS of GECCO, CORECT and CCRF.

| rsid        | SNP_Name         | Effect allele | Other allele | Direction | Meta-beta | Meta-se | Meta-pval | Meta-power | GECCO_beta | GECCO_se | GECCO_pval | GECCO_R2 Imputation | CORECT_T_beta | CORECT_se | CORECT_pval | CORECT_R2 Imputation |
|-------------|------------------|---------------|--------------|-----------|-----------|---------|-----------|------------|------------|----------|------------|---------------------|---------------|-----------|-------------|----------------------|
| rs6983267   | 8:128413305_G/T  | t             | g            | --        | -0.207    | 0.020   | 1.04E-24  | 1.00       | -0.214     | 0.031    | 5.96E-12   | 0.972               | -0.202        | 0.026     | 2.52E-14    | 1.011                |
| rs10505477  | 8:128407443_A/G  | a             | g            | ++        | 0.200     | 0.020   | 1.49E-23  | 1.00       | 0.204      | 0.031    | 4.27E-11   | 0.959               | 0.197         | 0.026     | 5.38E-14    | 1.008                |
| rs4939827   | 18:46453463_T/C  | t             | c            | ++        | 0.188     | 0.020   | 1.84E-20  | 0.99       | 0.149      | 0.031    | 1.88E-06   | 0.988               | 0.216         | 0.027     | 4.69E-16    | 1.047                |
| rs12953717  | 18:46453929_C/T  | t             | c            | ++        | 0.172     | 0.022   | 3.27E-15  | 1.00       | 0.161      | 0.032    | 7.47E-07   | 0.970               | 0.181         | 0.029     | 7.78E-10    | 1.036                |
| rs4464148   | 18:46459032_T/C  | t             | c            | --        | -0.174    | 0.029   | 1.55E-09  | 1.00       | -0.102     | 0.044    | 1.96E-02   | 0.961               | -0.228        | 0.038     | 2.33E-09    | 1.063                |
| rs355527    | 20:6388068_T/C   | t             | c            | ++        | 0.168     | 0.028   | 3.15E-09  | 1.00       | 0.177      | 0.041    | 1.32E-05   | 1.003               | 0.158         | 0.039     | 5.63E-05    | 1.037                |
| rs961253    | 20:6404281_C/A   | a             | c            | ++        | 0.144     | 0.026   | 3.13E-08  | 1.00       | 0.170      | 0.038    | 8.83E-06   | 0.988               | 0.122         | 0.036     | 6.22E-04    | 1.045                |
| rs3802842   | 11:111171709_C/A | a             | c            | --        | -0.152    | 0.031   | 5.85E-07  | 1.00       | -0.181     | 0.048    | 1.62E-04   | 0.948               | -0.133        | 0.039     | 7.54E-04    | 1.011                |
| rs2736100   | 5:1286516_C/A    | a             | c            | ++        | 0.082     | 0.020   | 4.37E-05  | 1.00       | 0.089      | 0.032    | 0.005      | 0.922               | 0.078         | 0.026     | 0.003       | 1.008                |
| rs2665802   | 17:61995030_A/T  | a             | t            | ++        | 0.090     | 0.024   | 1.30E-04  | 0.41       | 0.094      | 0.036    | 0.010      | 0.878               | 0.087         | 0.031     | 0.005       | 0.972                |
| rs1862748   | 16:68832943_C/T  | t             | c            | --        | -0.103    | 0.029   | 3.67E-04  | 1.00       | -0.129     | 0.044    | 0.003      | 0.992               | -0.083        | 0.038     | 0.030       | 1.027                |
| rs719725    | 9:6365683_A/C    | a             | c            | ++        | 0.072     | 0.024   | 0.003     | 1.00       | 0.097      | 0.037    | 0.009      | 0.983               | 0.052         | 0.032     | 0.103       | 1.002                |
| rs1342387   | 1:202914356_T/C  | t             | c            | --        | -0.061    | 0.021   | 0.003     | 1.00       | -0.043     | 0.032    | 0.176      | 0.991               | -0.075        | 0.028     | 0.007       | 0.958                |
| rs7259371   | 19:33534641_G/A  | a             | g            | --        | -0.099    | 0.035   | 0.005     | 1.00       | -0.089     | 0.066    | 0.179      | 1.003               | -0.103        | 0.041     | 0.013       | 1.097                |
| rs16892766  | 8:117630683_A/C  | a             | c            | --        | -0.233    | 0.089   | 0.009     | 1.00       | -0.265     | 0.157    | 0.091      | 0.983               | -0.217        | 0.108     | 0.044       | 1.031                |
| rs8752      | 4:175412477_C/T  | t             | c            | --        | -0.056    | 0.022   | 0.010     | 0.74       | -0.057     | 0.034    | 0.092      | 0.983               | -0.056        | 0.029     | 0.051       | 1.038                |
| rs10795668  | 10:8701219_G/A   | a             | g            | --        | -0.072    | 0.028   | 0.011     | 1.00       | -0.023     | 0.043    | 0.600      | 0.993               | -0.109        | 0.038     | 0.004       | 1.007                |
| rs1800469   | 19:41860296_A/G  | a             | g            | --        | -0.067    | 0.027   | 0.012     | 1.00       | -0.066     | 0.043    | 0.121      | 0.999               | -0.068        | 0.034     | 0.047       | 1.033                |
| rs4803455   | 19:41851509_C/A  | a             | c            | ++        | 0.053     | 0.021   | 0.013     | 1.00       | 0.026      | 0.034    | 0.447      | 0.816               | 0.069         | 0.027     | 0.010       | 1.002                |
| rs928554    | 14:64694195_C/T  | t             | c            | --        | -0.053    | 0.022   | 0.018     | 1.00       | -0.046     | 0.033    | 0.162      | 0.995               | -0.058        | 0.030     | 0.053       | 1.005                |
| rs1136410   | 1:226555302_A/G  | a             | g            | --        | -0.096    | 0.045   | 0.034     | 0.69       | -0.023     | 0.084    | 0.783      | 0.980               | -0.127        | 0.054     | 0.019       | 1.055                |
| rs1801155   | 5:112175211_T/A  | a             | t            | +         | 1.149     | 0.629   | 0.068     | 1.00       | -0.160     | 1.381    | 0.908      | 0.653               | 1.491         | 0.706     | 0.035       | 1.007                |
| rs1801133   | 1:11856378_G/A   | a             | g            | --        | -0.041    | 0.027   | 0.124     | 0.43       | -0.011     | 0.044    | 0.796      | 0.826               | -0.058        | 0.033     | 0.083       | 1.013                |
| rs1569686   | 20:31367079_G/T  | t             | g            | --        | -0.034    | 0.023   | 0.134     | 1.00       | -0.059     | 0.035    | 0.094      | 0.999               | -0.016        | 0.030     | 0.594       | 1.113                |
| rs25487     | 19:44055726_T/C  | t             | c            | --        | -0.038    | 0.026   | 0.153     | 1.00       | -0.031     | 0.040    | 0.440      | 0.915               | -0.042        | 0.035     | 0.221       | 1.008                |
| rs36053993  | 1:45797228_C/T   | t             | c            | ++        | 20.751    | 15.062  | 0.168     | 1.00       | 84.757     | 84.007   | 0.313      | 0.835               | 18.625        | 15.310    | 0.224       | 0.797                |
| rs9344      | 11:69462910_G/A  | a             | g            | ++        | 0.030     | 0.023   | 0.188     | 1.00       | 0.058      | 0.036    | 0.110      | 0.770               | 0.012         | 0.029     | 0.677       | 0.940                |
| rs4444903   | 4:110834110_A/G  | a             | g            | --        | -0.029    | 0.022   | 0.196     | 1.00       | -0.012     | 0.035    | 0.732      | 0.973               | -0.040        | 0.028     | 0.165       | 1.042                |
| rs34612342* | 1:45798475_T/C   | t             | c            | ?-        | -1236     | 975.53  | 0.205     | 1.00       | -40.662    | 170.70   | 0.812      | 0.163               | -1235         | 975.536   | 0.205       | 0.097                |
| rs1799930   | 8:18258103_G/A   | a             | g            | +         | -0.035    | 0.030   | 0.253     | 1.00       | -0.086     | 0.046    | 0.058      | 1.005               | 0.007         | 0.041     | 0.873       | 1.012                |
| rs1229984   | 4:100239319_T/C  | t             | c            | +-        | -0.063    | 0.060   | 0.298     | 0.90       | 0.326      | 0.221    | 0.139      | 0.815               | -0.094        | 0.062     | 0.133       | 1.200                |
| rs1045642   | 7:87138645_A/G   | a             | g            | --        | -0.020    | 0.020   | 0.310     | 0.77       | -0.008     | 0.031    | 0.806      | 0.978               | -0.029        | 0.026     | 0.266       | 1.026                |
| rs4608577   | 2:47703984_T/G   | t             | g            | --        | -0.048    | 0.050   | 0.333     | 0.91       | -0.106     | 0.075    | 0.155      | 0.993               | -0.002        | 0.066     | 0.975       | 1.005                |
| rs3803185   | 13:50205025_T/C  | t             | c            | --        | -0.019    | 0.020   | 0.340     | 1.00       | -0.004     | 0.030    | 0.896      | 0.974               | -0.029        | 0.026     | 0.254       | 1.051                |
| rs1205      | 1:159682233_C/T  | t             | c            | ++        | 0.023     | 0.025   | 0.354     | 0.99       | 0.047      | 0.040    | 0.240      | 1.002               | 0.008         | 0.032     | 0.806       | 1.041                |
| rs1800562   | 6:26093141_G/A   | a             | g            | ++        | 0.134     | 0.146   | 0.358     | 0.99       | 0.170      | 0.198    | 0.391      | 0.971               | 0.092         | 0.216     | 0.671       | 1.022                |
| rs699947    | 6:43736389_A/C   | a             | c            | +         | -0.018    | 0.020   | 0.358     | 1.00       | -0.045     | 0.030    | 0.135      | 0.960               | 0.002         | 0.026     | 0.942       | 0.971                |
| rs11568820  | 12:48302545_C/T  | t             | c            | +-        | 0.035     | 0.038   | 0.359     | 1.00       | 0.223      | 0.065    | 0.001      | 0.967               | -0.064        | 0.047     | 0.180       | 1.039                |
| rs1800947   | 1:159683438_C/G  | c             | g            | ++        | 0.132     | 0.146   | 0.364     | 0.61       | 0.182      | 0.245    | 0.456      | 0.766               | 0.105         | 0.182     | 0.564       | 0.982                |
| rs35767     | 12:102875569_A/G | a             | g            | ++        | 0.042     | 0.048   | 0.375     | 1.00       | 0.068      | 0.082    | 0.406      | 0.970               | 0.029         | 0.059     | 0.619       | 1.027                |
| rs1801280   | 8:18257854_T/C   | t             | c            | +         | -0.019    | 0.022   | 0.389     | 0.93       | -0.051     | 0.032    | 0.106      | 0.994               | 0.010         | 0.030     | 0.735       | 1.094                |
| rs4951291   | 1:204006538_T/C  | t             | c            | +-        | 0.074     | 0.091   | 0.417     | 0.99       | 0.117      | 0.104    | 0.258      | 0.952               | -0.068        | 0.186     | 0.717       | 0.851                |
| rs4951039   | 1:204006597_G/A  | a             | g            | +         | -0.073    | 0.091   | 0.419     | 1.00       | -0.115     | 0.104    | 0.266      | 0.951               | 0.063         | 0.186     | 0.736       | 0.853                |
| rs2228000   | 3:14199887_G/A   | a             | g            | +         | 0.026     | 0.035   | 0.465     | 1.00       | -0.072     | 0.054    | 0.182      | 0.997               | 0.097         | 0.046     | 0.035       | 1.011                |
| rs2241766   | 3:186570892_T/G  | t             | g            | ++        | 0.051     | 0.070   | 0.470     | 1.00       | 0.061      | 0.114    | 0.592      | 0.961               | 0.045         | 0.089     | 0.618       | 0.861                |
| rs2066844   | 16:50745926_C/T  | t             | c            | +-        | 0.139     | 0.201   | 0.491     | 1.00       | 0.622      | 0.255    | 0.015      | 0.901               | -0.660        | 0.328     | 0.044       | 0.920                |
| rs2292832   | 2:241395503_T/C  | t             | c            | --        | -0.024    | 0.035   | 0.499     | 1.00       | -0.027     | 0.047    | 0.561      | 0.922               | -0.019        | 0.051     | 0.715       | 0.688                |
| rs1799853   | 10:96702047_C/T  | t             | c            | +-        | -0.044    | 0.067   | 0.511     | 0.99       | 0.038      | 0.099    | 0.706      | 0.997               | -0.112        | 0.091     | 0.217       | 0.983                |

|           |                   |   |    |    |        |        |       |      |        |       |       |       |        |        |       |       |
|-----------|-------------------|---|----|----|--------|--------|-------|------|--------|-------|-------|-------|--------|--------|-------|-------|
| rs10380   | 5:7897191_C/T     | t | c  | -- | -0.051 | 0.077  | 0.512 | 0.92 | -0.122 | 0.130 | 0.351 | 0.997 | -0.012 | 0.096  | 0.897 | 0.990 |
| rs20417   | 1:186650321_C/G   | c | g  | +- | -0.032 | 0.052  | 0.537 | 1.00 | 0.001  | 0.077 | 0.989 | 0.988 | -0.058 | 0.069  | 0.399 | 1.019 |
| rs1042838 | 11:100933412_C/A  | a | c  | -- | -0.030 | 0.051  | 0.558 | 1.00 | -0.010 | 0.079 | 0.902 | 1.000 | -0.045 | 0.067  | 0.506 | 1.033 |
| rs7849    | 10:102122603_T/C  | t | c  | +- | 0.024  | 0.045  | 0.593 | 1.00 | 0.085  | 0.073 | 0.250 | 0.983 | -0.013 | 0.057  | 0.827 | 1.007 |
| rs9858822 | 3:12411238_A/C    | a | c  | +- | -3.552 | 6.868  | 0.605 | 1.00 | 9406   | 72463 | 0.897 | 0.916 | -3.552 | 6.868  | 0.605 | 0.987 |
| rs26779   | 5:80059203_C/T    | t | c  | ++ | -0.012 | 0.023  | 0.620 | 0.99 | -0.062 | 0.035 | 0.076 | 1.001 | 0.029  | 0.031  | 0.361 | 0.998 |
| rs9282564 | 7:87229440_T/C    | t | c  | ++ | 0.022  | 0.047  | 0.646 | 0.99 | -0.013 | 0.145 | 0.927 | 0.748 | 0.026  | 0.050  | 0.605 | 1.145 |
| rs1128503 | 7:87179601_A/G    | a | g  | ++ | 0.009  | 0.022  | 0.664 | 1.00 | 0.010  | 0.033 | 0.759 | 0.996 | 0.009  | 0.029  | 0.758 | 1.019 |
| rs17655   | 13:103528002_G/C  | c | g  | +- | 0.014  | 0.034  | 0.679 | 1.00 | 0.076  | 0.058 | 0.188 | 1.004 | -0.018 | 0.042  | 0.663 | 1.064 |
| rs1800566 | 16:69745145_G/A   | a | g  | +- | 0.017  | 0.040  | 0.681 | 1.00 | 0.048  | 0.068 | 0.480 | 1.000 | -0.001 | 0.050  | 0.988 | 1.044 |
| rs1799750 | 11:102670495_TC/T | t | tc | +- | -0.009 | 0.021  | 0.682 | 1.00 | 0.016  | 0.034 | 0.630 | 0.885 | -0.025 | 0.028  | 0.357 | 0.937 |
| rs1799929 | 8:18257994_C/T    | t | c  | +- | 0.009  | 0.022  | 0.696 | 1.00 | 0.045  | 0.033 | 0.167 | 0.989 | -0.023 | 0.031  | 0.450 | 1.087 |
| rs1544410 | 12:48239835_C/T   | t | c  | +- | -0.009 | 0.024  | 0.712 | 1.00 | 0.005  | 0.034 | 0.892 | 0.998 | -0.021 | 0.032  | 0.524 | 1.066 |
| rs184967  | 5:80149981_A/G    | a | g  | -+ | -0.019 | 0.054  | 0.731 | 0.99 | -0.052 | 0.077 | 0.504 | 1.012 | 0.013  | 0.076  | 0.861 | 1.015 |
| rs895819  | 19:13947292_T/C   | t | c  | ++ | 0.010  | 0.029  | 0.739 | 0.99 | 0.007  | 0.044 | 0.867 | 0.921 | 0.012  | 0.039  | 0.767 | 0.951 |
| rs6083    | 15:58838010_A/G   | a | g  | +- | 0.009  | 0.028  | 0.760 | 0.43 | 0.030  | 0.042 | 0.477 | 0.886 | -0.009 | 0.038  | 0.817 | 0.855 |
| rs1950902 | 14:64882380_A/G   | a | g  | +- | -0.014 | 0.048  | 0.768 | 0.99 | 0.009  | 0.074 | 0.900 | 0.985 | -0.030 | 0.062  | 0.623 | 1.007 |
| rs1202168 | 7:87195962_G/A    | a | g  | +- | 0.006  | 0.022  | 0.780 | 1.00 | 0.014  | 0.033 | 0.667 | 0.988 | 0.000  | 0.029  | 0.993 | 0.977 |
| rs373572  | 3:8955389_C/T     | t | c  | +- | -0.008 | 0.030  | 0.781 | 1.00 | 0.047  | 0.049 | 0.341 | 0.996 | -0.041 | 0.038  | 0.280 | 1.076 |
| rs909460  | 18:55254310_C/T   | t | c  | -+ | 9.673  | 41.557 | 0.816 | 1.00 | -1743  | 13204 | 0.895 | 0.837 | 9.690  | 41.558 | 0.816 | 0.815 |
| rs2240308 | 17:63554591_G/A   | a | g  | +- | 0.005  | 0.022  | 0.824 | 1.00 | 0.019  | 0.040 | 0.632 | 0.650 | -0.001 | 0.026  | 0.965 | 1.028 |
| rs1801131 | 1:11854476_T/G    | t | g  | ++ | 0.006  | 0.029  | 0.836 | 0.03 | 0.006  | 0.044 | 0.889 | 0.969 | 0.006  | 0.039  | 0.879 | 1.012 |
| rs1048943 | 15:75012985_T/C   | t | c  | ++ | 0.022  | 0.117  | 0.849 | 1.00 | 0.089  | 0.386 | 0.817 | 0.921 | 0.016  | 0.122  | 0.899 | 1.075 |

\* rs34612342 was dropped due to low imputation quality.



**Supplementary Table S8. Linkage disequilibrium (LD) between “positive” SNPs with  $r^2 > 0.20$ .**

| SNP1       | SNP2      | $r^2$    | $D'$     |
|------------|-----------|----------|----------|
| rs12953717 | rs4464148 | 0.346066 | 0.727533 |
| rs355527   | rs961253  | 0.900220 | 0.999999 |

Supplementary Table S9. Summary of results from meta-analyses and credibility assessment (negative and null associations).

| Gene        | Variant         | Cases vs. controls<br>(number of samples) | ALLELIC MODEL |                   |         |                         |          |       | RECESSIVE MODEL: var/var VS. wt/wt & wt/var |                   |         |                         |          |       | DOMINANT MODEL: wt/var & var/var VS. wt/wt |                   |         |                         |          |       | Classification |
|-------------|-----------------|-------------------------------------------|---------------|-------------------|---------|-------------------------|----------|-------|---------------------------------------------|-------------------|---------|-------------------------|----------|-------|--------------------------------------------|-------------------|---------|-------------------------|----------|-------|----------------|
|             |                 |                                           | N             | Effect size       |         | Heterogeneity           |          | Power | N                                           | Effect size       |         | Heterogeneity           |          | Power | N                                          | Effect size       |         | Heterogeneity           |          | Power |                |
|             |                 |                                           |               | OR (95% CI)       | P value | I <sup>2</sup> (95% CI) | P value  |       |                                             | OR (95% CI)       | P value | I <sup>2</sup> (95% CI) | P value  |       |                                            | OR (95% CI)       | P value | I <sup>2</sup> (95% CI) | P value  |       |                |
| CYP2E1      | 96-bp insertion | 1614 vs. 2396 (6)                         | 6             | 1.21 (1.00, 1.47) | 0.051   | 37 (0, 97)              | 0.158    | 0.65  | 6                                           | 1.18 (0.85, 1.63) | 0.321   | 0 (0, 92)               | 0.540    | 0.14  | 6                                          | 1.26 (0.99, 1.60) | 0.057   | 42 (0, 96)              | 0.122    | 0.95  | Negative       |
| NAT2        | rs1801280       | 2470 vs. 2971 (5)                         | 5             | 1.01 (0.82, 1.25) | 0.891   | 80(63, 99)              | 4.31E-04 | 0.54  | 5                                           | 0.97 (0.75, 1.24) | 0.795   | 60 (0, 98)              | 0.040    | 0.32  | 5                                          | 1.04 (0.76, 1.44) | 0.796   | 82(71, 99)              | 2.12E-04 | 0.77  | Negative       |
| MMP3        | rs3025058       | 1212 vs. 1631(8)                          | 7             | 0.96(0.79,1.16)   | 0.681   | 42(0,93)                | 0.108    | 0.08  | 8                                           | 1.00(0.73,1.35)   | 0.979   | 21(0,91)                | 0.264    | 0.05  | 7                                          | 0.88(0.66,1.18)   | 0.382   | 56(0,92)                | 0.032    | 0.39  | Negative       |
| MMP9        | rs3918242       | 621 vs. 904(5)                            | 4             | 0.88(0.68,1.16)   | 0.369   | 13(0,94)                | 0.325    | 0.12  | 4                                           | 0.79(0.18,3.41)   | 0.752   | 11(0,93)                | 0.339    | 0.08  | 5                                          | 0.88(0.67,1.16)   | 0.358   | 18(0,90)                | 0.302    | 0.18  | Negative       |
| ADH1C       | rs698           | 4545 vs. 18180(9**)                       | 9             | 1.01(0.89,1.15)   | 0.855   | 76(61,98)               | 5.21E-05 | 0.06  | 9                                           | 1.12(0.92,1.37)   | 0.266   | 59(11,93)               | 0.012    | 0.70  | 9                                          | 0.97(0.82,1.15)   | 0.743   | 72(53,97)               | 3.17E-04 | 0.15  | Negative       |
| VEGF        | rs3025039       | 3090 vs. 3147(11)                         | 10            | 1.08(0.93,1.27)   | 0.309   | 58(7,90)                | 0.015    | 0.21  | 10                                          | 1.17(0.91,1.52)   | 0.226   | 0(0,83)                 | 0.692    | 0.20  | 11                                         | 1.13(0.95,1.33)   | 0.161   | 54(6,84)                | 0.015    | 0.40  | Negative       |
| VEGF        | rs2010963       | 2426 vs. 2387(7)                          | 7             | 0.94(0.85,1.04)   | 0.216   | 31(0,87)                | 0.193    | 0.18  | 7                                           | 1.01(0.87,1.18)   | 0.870   | 0(0,78)                 | 0.539    | 0.05  | 7                                          | 0.90(0.74,1.09)   | 0.271   | 58(0,91)                | 0.025    | 0.42  | Negative       |
| MGMT        | rs2308321       | 2863 vs. 8040(6)                          | 5             | 1.00(0.73,1.38)   | 0.988   | 77(43,98)               | 0.002    | 0.05  | 5                                           | 1.31(0.56,3.08)   | 0.533   | 29(0,96)                | 0.229    | 0.39  | 6                                          | 0.98(0.77,1.25)   | 0.880   | 71(37,97)               | 0.004    | 0.07  | Negative       |
| IL10        | rs1800896       | 4510 vs. 5363(9*)                         | 9             | 1.00(0.92,1.08)   | 0.947   | 20(0,84)                | 0.268    | 0.06  | 9                                           | 0.98(0.90,1.08)   | 0.738   | 0(0,83)                 | 0.496    | 0.10  | 9                                          | 1.00(0.88,1.15)   | 0.925   | 23(0,83)                | 0.235    | 0.05  | Negative       |
| PTGS2/CO X2 | rs4648298       | 2359 vs. 2538(5)                          | na            | na                | na      | na                      | na       | na    | na                                          | na                | na      | na                      | na       | na    | 5                                          | 0.88(0.52,1.51)   | 0.653   | 71(20,97)               | 0.008    | 0.18  | Negative       |
| PTGS2/CO X2 | rs5273          | 720 vs. 1163(4)                           | na            | na                | na      | na                      | na       | na    | na                                          | na                | na      | na                      | na       | na    | 3                                          | 0.71(0.46,1.10)   | 0.128   | 0(0,63)                 | 0.924    |       | Negative       |
| TNF-alpha   | rs1800629       | 2980 vs. 4102(13)                         | 13            | 1.11(0.90,1.37)   | 0.333   | 74(59,94)               | 7.40E-06 | 0.58  | 13                                          | 1.34(0.82,2.19)   | 0.238   | 48(0,87)                | 0.030    | 0.46  | 13                                         | 1.09(0.87,1.36)   | 0.468   | 69(51,93)               | 9.40E-05 | 0.68  | Negative       |
| NOD2        | rs2066845       | 3303 vs. 3088(9)                          | 9             | 1.33(0.94,1.87)   | 0.103   | 0(0,70)                 | 0.529    | 0.23  | na                                          | na                | na      | na                      | na       | na    | 9                                          | 1.34(0.95,1.88)   | 0.098   | 0(0,71)                 | 0.495    | 0.42  | Negative       |
| NAT1        | slow/rapid      | 4791 vs. 6628 (15)                        | 7             | 0.92 (0.83, 1.02) | 0.116   | 0 (0, 83)               | 0.470    | 0.53  | 7                                           | 1.05 (0.86, 1.27) | 0.652   | 0 (0, 34)               | 0.932    | 0.12  | 14                                         | 0.99 (0.87, 1.14) | 0.926   | 55 (14, 87)             | 0.007    | 0.06  | Negative       |
| MDM2        | rs2279744       | 3564 vs. 2835 (10)                        | 10            | 1.09 (0.92, 1.30) | 0.307   | 78 (66, 96)             | 5.41E-06 | 0.40  | 10                                          | 1.03 (0.84, 1.25) | 0.806   | 52 (0, 92)              | 0.029    | 0.08  | 10                                         | 1.26 (0.94, 1.68) | 0.126   | 80 (77, 98)             | 1.04E-06 | 0.98  | Negative       |
| VDR         | rs731236        | 2091 vs. 2257 (9)                         | 9             | 1.03 (0.90, 1.18) | 0.674   | 44 (0, 93)              | 0.077    | 0.08  | 8                                           | 1.13 (0.83, 1.54) | 0.435   | 62 (16, 95)             | 0.010    | 0.06  | 9                                          | 0.99 (0.86, 1.14) | 0.900   | 11 (0, 86)              | 0.346    | 0.60  | Negative       |
| CTLA4       | rs231775        | 777 vs. 1356(5)                           | 5             | 1.13(0.98,1.30)   | 0.087   | 0(0,87)                 | 0.565    | 0.27  | 5                                           | 1.04(0.81,1.35)   | 0.744   | 0(0,96)                 | 0.603    | 0.06  | 5                                          | 1.29(0.93,1.80)   | 0.126   | 53(0,98)                | 0.075    | 0.76  | Negative       |
| CX3CR1      | rs3732379       | 3548 vs. 3649(3*)                         | 3             | 0.96(0.81,1.14)   | 0.636   | 54(0,99)                | 0.112    | 0.12  | 3                                           | 0.65(0.33,1.29)   | 0.220   | 80(21,100)              | 0.007    | 1.00  | 3                                          | 1.02(0.90,1.16)   | 0.718   | 14(0,99)                | 0.312    | 0.07  | Negative       |
| DLG5        | rs1248696       | 3672 vs. 3618(3*)                         | 3             | 0.57(0.19,1.69)   | 0.308   | 98(94,100)              | 1.24E-23 | 1.00  | 3                                           | 0.44(0.12,1.69)   | 0.235   | 66(0,99)                | 0.054    | 0.89  | 3                                          | 0.47(0.12,1.89)   | 0.288   | 98(96,100)              | 5.23E-29 | 1.00  | Negative       |
| DNMT3B      | rs2424913       | 2398 vs. 3740(5)                          | 5             | 1.04(0.95,1.14)   | 0.360   | 0(0,98)                 | 0.586    | 0.12  | 3                                           | 1.04(0.91,1.18)   | 0.569   | 0(0,94)                 | 0.847    | 0.10  | 5                                          | 1.08(0.92,1.26)   | 0.341   | 0(0,95)                 | 0.560    | 0.27  | Negative       |
| ERCC1       | rs11615         | 4231 vs. 4928(7*)                         | 7             | 0.99(0.93,1.05)   | 0.756   | 0(0,87)                 | 0.429    | 0.06  | 7                                           | 0.95(0.84,1.07)   | 0.392   | 0(0,87)                 | 0.458    | 0.14  | 7                                          | 1.01(0.93,1.11)   | 0.858   | 0(0,87)                 | 0.456    | 0.06  | Negative       |
| ERCC1       | rs3212986       | 1815 vs. 1858(4*)                         | 3             | 1.11(0.93,1.31)   | 0.245   | 42(0,99)                | 0.178    | 0.28  | 3                                           | 1.22(0.92,1.63)   | 0.166   | 7(0,98)                 | 0.341    | 0.34  | 4                                          | 1.11(0.96,1.27)   | 0.151   | 7(0,95)                 | 0.357    | 0.35  | Negative       |
| ESR1        | rs2234693       | 2792 vs. 3288(6)                          | 6             | 0.90(0.76,1.07)   | 0.229   | 66(26,98)               | 0.012    | 0.53  | 6                                           | 0.87(0.70,1.09)   | 0.231   | 39(0,97)                | 0.149    | 0.59  | 6                                          | 0.91(0.68,1.22)   | 0.539   | 70(47,99)               | 0.005    | 0.39  | Negative       |
| ESR1        | rs2077647       | 2594 vs. 3086(4)                          | 4             | 1.03(0.89,1.19)   | 0.699   | 56(0,100)               | 0.079    | 0.09  | 4                                           | 1.09(0.77,1.55)   | 0.637   | 75(75,100)              | 0.007    | 0.27  | 4                                          | 1.01(0.90,1.14)   | 0.879   | 0(0,98)                 | 0.501    | 0.05  | Negative       |
| ESR1        | rs3798577       | 2593 vs. 3100(4)                          | 4             | 1.02(0.94,1.10)   | 0.706   | 6(0,99)                 | 0.361    | 0.07  | 4                                           | 1.08(0.95,1.23)   | 0.235   | 0(0,98)                 | 0.639    | 0.23  | 4                                          | 0.97(0.86,1.09)   | 0.614   | 0(0,98)                 | 0.391    | 0.08  | Negative       |
| FOLH1       | His475Tyr       | 3389 vs. 4333(4)                          | 4             | 0.94(0.86,1.02)   | 0.155   | 0(0,0)                  | 0.983    | 0.17  | na                                          | na                | na      | na                      | na       | na    | 4                                          | 0.94(0.85,1.04)   | 0.224   | 0(0,9)                  | 0.968    | 0.23  | Negative       |
| GPX1        | rs1050450       | 1974 vs. 2481(4)                          | 3             | 1.01(0.90,1.13)   | 0.917   | 0(0,96)                 | 0.446    | 0.05  | 3                                           | 0.90(0.67,1.20)   | 0.467   | 0(0,76)                 | 0.912    | 0.16  | 4                                          | 0.98(0.83,1.15)   | 0.774   | 31(0,94)                | 0.226    | 0.06  | Negative       |
| GPX4        | rs713041        | 1733 vs. 1519(3)                          | 3             | 0.95(0.76,1.19)   | 0.685   | 78(18,100)              | 0.011    | 0.11  | 3                                           | 0.98(0.81,1.18)   | 0.812   | 0(0,97)                 | 0.466    | 0.06  | 3                                          | 0.91(0.62,1.35)   | 0.649   | 84(45,100)              | 0.002    | 0.25  | Negative       |
| HPGD        | rs9312555       | 3976 vs. 4831(3*)                         | 3             | 0.95(0.88,1.04)   | 0.252   | 0(0,94)                 | 0.629    | 0.14  | 3                                           | 1.06(0.81,1.40)   | 0.668   | 0(0,97)                 | 0.415    | 0.71  | 3                                          | 0.93(0.85,1.03)   | 0.150   | 0(0,87)                 | 0.817    | 0.33  | Negative       |
| HPGD        | rs17360144      | 3962 vs. 4826(3*)                         | 3             | 1.01(0.88,1.15)   | 0.917   | 20(0,98)                | 0.289    | 0.05  | 3                                           | 1.07(0.34,3.33)   | 0.913   | 70(0,99)                | 0.034    | 0.06  | 3                                          | 1.01(0.87,1.17)   | 0.923   | 31(0,98)                | 0.236    | 0.05  | Negative       |
| ICAM1       | rs1799969       | 3275 vs. 3368(3*)                         | 2             | 1.34(0.78,2.31)   | 0.293   | 86(30,100)              | 0.007    | 0.98  | 2                                           | 1.39(0.92,2.10)   | 0.118   | 0(0,99)                 | 0.751    | 0.38  | 2                                          | 1.40(0.72,2.72)   | 0.321   | 88(42,100)              | 0.003    | 1.00  | Negative       |
| IRS2        | rs1805097       | 3890 vs. 4778(3)                          | 3             | 0.95(0.9,1.02)    | 0.138   | 0(0,96)                 | 0.693    | 0.21  | 3                                           | 1.02(0.91,1.14)   | 0.732   | 0(0,97)                 | 0.624    | 0.06  | 3                                          | 0.91(0.82,1.02)   | 0.116   | 37(0,99)                | 0.203    | 0.57  | Negative       |
| LCT         | rs4988235       | 1927 vs. 2182(6)                          | 6             | 1.00(0.85,1.18)   | 0.991   | 59(0,93)                | 0.033    | 0.05  | 6                                           | 1.03(0.77,1.38)   | 0.841   | 58(0,97)                | 0.036    | 0.07  | 6                                          | 0.95(0.77,1.16)   | 0.594   | 42(0,89)                | 0.128    | 0.12  | Negative       |
| LEP         | rs2167270       | 1839 vs. 2429(3)                          | 3             | 0.94(0.86,1.03)   | 0.205   | 0(0,98)                 | 0.478    | 0.16  | 3                                           | 0.74(0.52,1.04)   | 0.085   | 46(0,100)               | 0.159    | 0.90  | 3                                          | 1.03(0.91,1.17)   | 0.621   | 0(0,92)                 | 0.593    | 0.08  | Negative       |
| LEP         | rs7799039       | 2324 vs. 2776(3)                          | 3             | 0.95(0.88,1.03)   | 0.223   | 0(0,98)                 | 0.461    | 0.15  | 3                                           | 0.89(0.77,1.02)   | 0.088   | 0(0,99)                 | 0.528    | 0.36  | 3                                          | 0.98(0.87,1.10)   | 0.702   | 0(0,95)                 | 0.524    | 0.06  | Negative       |
| LEPR        | rs1137101       | 4059 vs. 4225(4*)                         | 4             | 1.02(0.96,1.08)   | 0.611   | 0(0,94)                 | 0.518    | 0.07  | 4                                           | 1.03(0.93,1.14)   | 0.598   | 0(0,48)                 | 0.905    | 0.08  | 4                                          | 1.04(0.91,1.19)   | 0.534   | 25(0,98)                | 0.262    | 0.13  | Negative       |
| MBL2        | rs5030737       | 1185 vs. 1199(4)                          | 4             | 1.03(0.81,1.30)   | 0.805   | 0(0,77)                 | 0.806    | 0.05  | 2                                           | 0.95(0.25,3.57)   | 0.939   | 0(0,77)                 | 0.948    | 0.05  | 4                                          | 1.04(0.81,1.33)   | 0.784   | 0(0,78)                 | 0.793    | 0.06  | Negative       |
| MBL2        | rs1800451       | 819 vs. 843(3)                            | 3             | 1.29(0.92,1.81)   | 0.134   | 0(0,98)                 | 0.442    | 0.26  | na                                          | na                | na      | na                      | na       | na    | 3                                          | 1.26(0.85,1.87)   | 0.242   | 0(0,98)                 | 0.451    | 0.36  | Negative       |
| MBL2        | rs7096206       | 826 vs. 871(3)                            | 3             | 0.97(0.81,1.16)   | 0.761   | 0(0,92)                 | 0.805    | 0.06  | 3                                           | 0.95(0.53,1.71)   | 0.866   | 15(0,99)                | 0.310    | 0.05  | 3                                          | 0.97(0.79,1.20)   | 0.809   | 0(0,53)                 | 0.943    | 0.06  | Negative       |
| MBL2        | rs11003125      | 822 vs. 870(3)                            | 3             | 0.91(0.70,1.17)   | 0.462   | 53(0,99)                | 0.120    | 0.15  | 3                                           | 0.89(0.64,1.23)   | 0.483   | 0(0,100)                | 0.372    | 0.11  | 3                                          | 0.91(0.68,1.22)   | 0.540   | 41(0,99)                | 0.186    | 0.16  | Negative       |
| MBL2        | rs7095891       | 822 vs. 870(3)                            | 3             | 1.02(0.86,1.20)   | 0.847   | 0(0,90)                 | 0.813    | 0.05  | 3                                           | 0.99(0.68,1.45)   | 0.952   | 0(0,0)                  | 0.978    | 0.05  | 3                                          | 1.03(0.84,1.27)   | 0.783   | 0(0,96)                 | 0.700    | 0.06  | Negative       |
| miR         | rs11614913      | 2101 vs. 2961(7)                          | 7             | 0.95(0.72,1.26)   | 0.740   | 91(74,98)               | 4.60E-12 | 0.15  | 7                                           | 0.84(0.54,1.31)   | 0.450   | 89(86,99)               | 4.51E-10 | 0.73  | 7                                          | 0.91(0.62,1.34)   | 0.647   | 86(59,96)               | 1.81E-07 | 0.31  | Negative       |
| miR         | rs3746444       | 717 vs. 1055(3)                           | 2             | 1.20(0.91,1.59)   | 0.199   | 27(0,100)               | 0.243    | 0.31  | 2                                           | 1.68(0.58,4.86)   | 0.340   | 66(0,100)               | 0.085    | 0.55  | 3                                          | 0.98(0.79,1.21)   | 0.860   | 0(0,88)                 | 0.780    | 0.05  | Negative       |
| MSH2        | rs2303428       | 4371 vs. 4590(5)                          | 5             | 0.96(0.87,1.06)   | 0.402   | 0(0,87)                 | 0.519    | 0.09  | 5                                           | 1.02(0.70,1.48)   | 0.929   | 0(0,64)                 | 0.863    | 0.05  | 5                                          | 0.95(0.84,1.07)   | 0.377   | 9(0,91)                 | 0.353    | 0.17  | Negative       |

|            |            |                    |    |                   |       |             |          |      |    |                   |       |             |          |      |    |                   |       |             |          |      |          |
|------------|------------|--------------------|----|-------------------|-------|-------------|----------|------|----|-------------------|-------|-------------|----------|------|----|-------------------|-------|-------------|----------|------|----------|
| MSH2       | rs2303425  | 1775 vs. 2206(3)   | 3  | 1.01(0.87,1.17)   | 0.947 | 14(0,98)    | 0.312    | 0.05 | 3  | 2.34(0.56,9.74)   | 0.243 | 74(4,99)    | 0.021    | 0.98 | 3  | 0.97(0.78,1.20)   | 0.764 | 47(0,99)    | 0.150    | 0.07 | Negative |
| MSH2       | rs4987188  | 3719 vs. 3852(6)   | 3  | 1.10(0.79,1.54)   | 0.558 | 0(0,97)     | 0.521    | 0.09 | na | na                | na    | na          | na       | na   | 6  | 1.18(0.92,1.52)   | 0.202 | 0(0,57)     | 0.851    | 0.25 | Negative |
| MSH2       | rs1981929  | 4319 vs. 4009(3*)  | 3  | 1.02(0.95,1.09)   | 0.608 | 13(0,97)    | 0.319    | 0.07 | 3  | 1.04(0.86,1.26)   | 0.659 | 56(0,99)    | 0.104    | 0.10 | 3  | 1.03(0.94,1.12)   | 0.562 | 0(0,84)     | 0.829    | 0.10 | Negative |
| MSH2       | rs4952887  | 4321 vs. 4011(3*)  | 3  | 1.03(0.93,1.15)   | 0.537 | 0(0,94)     | 0.610    | 0.07 | 3  | 0.70(0.32,1.51)   | 0.360 | 52(0,99)    | 0.126    | 0.24 | 3  | 1.05(0.94,1.18)   | 0.378 | 0(0,85)     | 0.839    | 0.13 | Negative |
| MSH6       | rs1042821  | 4936 vs. 8223(6)   | 6  | 1.05(0.93,1.20)   | 0.408 | 65(16,97)   | 0.014    | 0.07 | 6  | 0.98(0.80,1.21)   | 0.875 | 0(0,88)     | 0.576    | 0.06 | 6  | 1.07(0.92,1.25)   | 0.348 | 68(23,98)   | 0.009    | 0.12 | Negative |
| MSH6       | rs1800936  | 3867 vs. 4019(3*)  | 3  | 1.31(0.86,2.00)   | 0.203 | 95(82,100)  | 8.01E-09 | 0.99 | 3  | 1.45(0.76,2.76)   | 0.255 | 70(0,99)    | 0.034    | 0.64 | 3  | 1.38(0.85,2.24)   | 0.196 | 95(84,100)  | 3.54E-09 | 1.00 | Negative |
| MSH6       | rs3136245  | 4314 vs. 4013(3*)  | 3  | 0.96(0.89,1.04)   | 0.301 | 7(0,98)     | 0.340    | 0.12 | 3  | 0.93(0.71,1.21)   | 0.575 | 31(0,99)    | 0.233    | 0.10 | 3  | 0.96(0.87,1.05)   | 0.325 | 0(0,96)     | 0.479    | 0.15 | Negative |
| MSH6       | rs3136329  | 4305 vs. 3996(3*)  | 3  | 1.02(0.96,1.09)   | 0.447 | 0(0,96)     | 0.554    | 0.07 | 3  | 1.04(0.91,1.18)   | 0.561 | 18(0,98)    | 0.294    | 0.10 | 3  | 1.03(0.93,1.13)   | 0.590 | 7(0,97)     | 0.343    | 0.10 | Negative |
| MSH6       | rs6713506  | 4306 vs. 3995(3*)  | 3  | 0.96(0.88,1.05)   | 0.355 | 0(0,92)     | 0.740    | 0.10 | 3  | 0.97(0.73,1.28)   | 0.810 | 0(0,90)     | 0.799    | 0.06 | 3  | 0.95(0.87,1.05)   | 0.333 | 0(0,93)     | 0.692    | 0.19 | Negative |
| NBS1       | rs1805794  | 3948 vs. 4316(5)   | 5  | 0.90(0.74,1.10)   | 0.311 | 83(72,99)   | 1.03E-04 | 0.62 | 5  | 0.80(0.58,1.11)   | 0.184 | 75(48,99)   | 0.003    | 0.90 | 5  | 0.95(0.77,1.18)   | 0.660 | 70(29,99)   | 0.010    | 0.21 | Negative |
| NFKB1      | rs28362491 | 2897 vs. 4961(11)  | 11 | 1.19(0.99,1.43)   | 0.064 | 85(65,95)   | 5.22E-10 | 0.62 | 11 | 1.14(0.89,1.46)   | 0.313 | 71(47,96)   | 1.30E-04 | 0.15 | 11 | 1.44(1.02,2.05)   | 0.040 | 88(85,98)   | 4.77E-13 | 1.00 | Negative |
| NFKB1A     | rs696      | 2310 vs. 3018(4*)  | 4  | 1.01(0.93,1.09)   | 0.871 | 0(0,94)     | 0.436    | 0.05 | 4  | 1.10(0.95,1.28)   | 0.188 | 0(0,78)     | 0.887    | 0.26 | 4  | 0.99(0.79,1.25)   | 0.940 | 70(6,98)    | 0.019    | 0.05 | Negative |
| NOS3       | rs1799983  | 2301 vs. 2478(5)   | 5  | 0.98(0.79,1.22)   | 0.845 | 75(46,99)   | 0.003    | 0.06 | 5  | 0.92(0.59,1.45)   | 0.730 | 59(0,99)    | 0.043    | 0.10 | 5  | 1.00(0.80,1.25)   | 0.994 | 64(0,98)    | 0.026    | 0.05 | Negative |
| NOS3       | rs2070744  | 1576 vs. 1782(3)   | 3  | 1.10(0.87,1.40)   | 0.423 | 66(0,99)    | 0.052    | 0.21 | 3  | 0.96(0.71,1.29)   | 0.771 | 0(0,82)     | 0.821    | 0.06 | 3  | 1.13(0.85,1.50)   | 0.398 | 64(0,99)    | 0.060    | 0.41 | Negative |
| PMS2       | rs6463524  | 3713 vs. 3374(3)   | 3  | 1.06(0.85,1.33)   | 0.596 | 80(35,100)  | 0.006    | 0.16 | 3  | 1.09(0.83,1.43)   | 0.545 | 10(0,99)    | 0.331    | 0.10 | 3  | 1.05(0.81,1.36)   | 0.694 | 80(31,100)  | 0.007    | 0.16 | Negative |
| PMS2       | rs2286680  | 4320 vs. 4010(3*)  | 3  | 1.01(0.93,1.11)   | 0.757 | 0(0,87)     | 0.826    | 0.05 | 3  | 1.06(0.78,1.45)   | 0.706 | 0(0,94)     | 0.668    | 0.07 | 3  | 1.01(0.92,1.12)   | 0.822 | 0(0,91)     | 0.802    | 0.05 | Negative |
| PMS2       | rs235060   | 4315 vs. 4006(3*)  | 3  | 0.97(0.90,1.04)   | 0.335 | 0(0,63)     | 0.925    | 0.09 | 3  | 1.00(0.83,1.20)   | 0.981 | 0(0,95)     | 0.647    | 0.05 | 3  | 0.95(0.87,1.03)   | 0.231 | 0(0,88)     | 0.788    | 0.21 | Negative |
| RAD51      | rs1801320  | 853 vs. 840(5)     | 5  | 1.07(0.44,2.62)   | 0.876 | 96(87,99)   | 9.64E-23 | 0.10 | 5  | 1.05(0.17,6.58)   | 0.960 | 96(84,99)   | 3.23E-19 | 0.06 | 5  | 1.13(0.56,2.27)   | 0.728 | 89(71,99)   | 1.71E-07 | 0.24 | Negative |
| RNASEL     | rs486907   | 3524 vs. 3789(3*)  | 3  | 1.01(0.94,1.08)   | 0.777 | 0(0,95)     | 0.722    | 0.06 | 3  | 1.05(0.91,1.21)   | 0.491 | 0(0,96)     | 0.684    | 0.10 | 3  | 1.00(0.91,1.09)   | 0.948 | 0(0,86)     | 0.867    | 0.05 | Negative |
| SERPINE1   | rs1799889  | 2241 vs. 2735(3)   | 3  | 0.97(0.89,1.05)   | 0.430 | 0(0,95)     | 0.644    | 0.08 | 3  | 1.08(0.94,1.25)   | 0.266 | 0(0,2)      | 0.974    | 0.20 | 3  | 0.87(0.77,0.99)   | 0.030 | 0(0,98)     | 0.372    | 0.62 | Negative |
| SHMT1      | rs1979277  | 1697 vs. 1994(5)   | 4  | 0.93(0.83,1.04)   | 0.222 | 19(0,95)    | 0.296    | 0.17 | 4  | 0.89(0.59,1.33)   | 0.566 | 64(0,99)    | 0.041    | 0.18 | 4  | 0.94(0.83,1.07)   | 0.379 | 0(0,87)     | 0.636    | 0.16 | Negative |
| SLC19A1    | rs1051266  | 4289 vs. 5817(6)   | 6  | 1.01(0.92,1.11)   | 0.809 | 52(0,86)    | 0.065    | 0.06 | 6  | 0.99(0.90,1.10)   | 0.868 | 1(0,74)     | 0.410    | 0.05 | 6  | 1.04(0.90,1.20)   | 0.590 | 54(0,90)    | 0.054    | 0.15 | Negative |
| SLC22A4    | rs1050152  | 3820 vs. 4749(5*)  | 5  | 1.01(0.96,1.06)   | 0.634 | 0(0,96)     | 0.414    | 0.06 | 5  | 0.99(0.91,1.07)   | 0.788 | 0(0,97)     | 0.510    | 0.05 | 5  | 1.06(0.96,1.16)   | 0.256 | 19(0,95)    | 0.295    | 0.22 | Negative |
| SOD2       | rs4880     | 2496 vs. 2283(4)   | 4  | 0.99(0.90,1.08)   | 0.767 | 0(0,62)     | 0.916    | 0.05 | 4  | 0.94(0.80,1.11)   | 0.461 | 0(0,81)     | 0.778    | 0.11 | 4  | 1.01(0.89,1.16)   | 0.862 | 0(0,0)      | 0.993    | 0.05 | Negative |
| SULT1A1    | rs9282861  | 4636 vs. 6291(12)  | 12 | 1.00(0.92,1.10)   | 0.914 | 48(0,90)    | 0.030    | 0.05 | 12 | 0.98(0.76,1.26)   | 0.875 | 72(48,92)   | 0.000    | 0.15 | 12 | 1.00(0.93,1.08)   | 0.942 | 0(0,66)     | 0.782    | 0.05 | Negative |
| SULT1A2    | rs1059491  | 1806 vs. 1986(3)   | 3  | 1.05(0.95,1.17)   | 0.308 | 5(0,98)     | 0.347    | 0.11 | 3  | 1.03(0.82,1.30)   | 0.783 | 15(0,98)    | 0.309    | 0.06 | 3  | 1.08(0.95,1.23)   | 0.219 | 0(0,94)     | 0.625    | 0.22 | Negative |
| Survivin31 | rs9904341  | 1452 vs. 1475(4)   | 4  | 1.20(0.84,1.72)   | 0.317 | 90(71,99)   | 8.51E-07 | 0.69 | 4  | 1.24(0.77,2.02)   | 0.375 | 84(55,99)   | 3.22E-04 | 0.69 | 4  | 1.23(0.77,1.96)   | 0.391 | 87(60,99)   | 5.63E-05 | 0.70 | Negative |
| TLR4       | rs4986790  | 4550 vs. 5432(10*) | 8  | 1.26(0.95,1.69)   | 0.112 | 58(8,96)    | 0.018    | 0.82 | 6  | 1.77(0.94,3.31)   | 0.075 | 10(0,93)    | 0.353    | 0.55 | 9  | 1.21(0.97,1.52)   | 0.088 | 37(0,94)    | 0.121    | 0.89 | Negative |
| TLR4       | rs4986791  | 3387 vs. 4072(6)   | 6  | 1.05(0.84,1.31)   | 0.687 | 22(0,98)    | 0.267    | 0.08 | 2  | 1.45(0.59,3.54)   | 0.413 | 3(0,99)     | 0.310    | 0.17 | 6  | 1.03(0.81,1.31)   | 0.782 | 24(0,98)    | 0.256    | 0.07 | Negative |
| UGT1A1     | rs10929302 | 1560 vs. 1952(3)   | 3  | 1.06(0.96,1.18)   | 0.248 | 0(0,98)     | 0.389    | 0.13 | 3  | 1.19(0.92,1.53)   | 0.181 | 25(0,98)    | 0.262    | 0.41 | 3  | 1.04(0.90,1.19)   | 0.612 | 0(0,59)     | 0.918    | 0.09 | Negative |
| UGT1A1     | rs4124874  | 1560 vs. 1987(3)   | 3  | 0.99(0.83,1.18)   | 0.930 | 58(0,99)    | 0.093    | 0.05 | 3  | 1.01(0.65,1.57)   | 0.962 | 74(6,100)   | 0.021    | 0.05 | 3  | 1.04(0.90,1.21)   | 0.563 | 0(0,97)     | 0.494    | 0.08 | Negative |
| UGT1A1     | UGT1A1*28  | 3344 vs. 4159(8)   | 8  | 1.03(0.93,1.14)   | 0.546 | 45(0,90)    | 0.081    | 0.09 | 8  | 1.03(0.89,1.19)   | 0.716 | 0(0,92)     | 0.479    | 0.07 | 8  | 1.05(0.90,1.22)   | 0.520 | 52(0,93)    | 0.040    | 0.18 | Negative |
| UGT1A6     | rs2070959  | 4773 vs. 5070(4*)  | 4  | 1.02(0.96,1.08)   | 0.568 | 0(0,85)     | 0.737    | 0.07 | 4  | 1.03(0.90,1.18)   | 0.672 | 0(0,95)     | 0.493    | 0.07 | 4  | 1.00(0.90,1.12)   | 0.940 | 29(0,97)    | 0.236    | 0.05 | Negative |
| UGT1A7     | x          | 2316 vs. 2918(6)   | 6  | 1.14(0.98,1.33)   | 0.096 | 65(9,95)    | 0.014    | 0.65 | 6  | 1.21(0.97,1.51)   | 0.092 | 45(0,94)    | 0.103    | 0.76 | 6  | 1.19(0.91,1.55)   | 0.201 | 73(22,94)   | 0.003    | 0.83 | Negative |
| WRN        | rs2725362  | 4681 vs. 4833(3)   | 3  | 0.95(0.89,1.02)   | 0.128 | 18(0,98)    | 0.294    | 0.24 | 3  | 0.91(0.81,1.02)   | 0.116 | 16(0,99)    | 0.303    | 0.44 | 3  | 0.95(0.87,1.03)   | 0.232 | 0(0,96)     | 0.405    | 0.21 | Negative |
| XPA        | rs1800975  | 2308 vs. 2871(6**) | 5  | 0.92(0.76,1.10)   | 0.341 | 69(12,97)   | 0.011    | 0.29 | 5  | 0.81(0.58,1.15)   | 0.244 | 58(0,96)    | 0.048    | 0.63 | 6  | 0.95(0.79,1.13)   | 0.537 | 53(0,95)    | 0.061    | 0.15 | Negative |
| MMP2       | rs243865   | 1215 vs. 1347 (8)  | 7  | 1.11 (0.80, 1.55) | 0.541 | 72 (47, 97) | 0.001    | 0.46 | 7  | 1.80 (0.90, 3.60) | 0.099 | 38 (0, 93)  | 0.155    | 0.80 | 8  | 0.98 (0.72, 1.34) | 0.913 | 58 (5, 95)  | 0.020    | 0.10 | Negative |
| MMP7       | rs11568818 | 2139 vs. 2355 (9*) | 9  | 0.96 (0.78, 1.16) | 0.649 | 61 (17, 96) | 0.008    | 0.06 | 6  | 0.91 (0.57, 1.45) | 0.683 | 75 (52, 98) | 0.001    | 0.15 | 9  | 0.97 (0.77, 1.23) | 0.811 | 48 (0, 94)  | 0.053    | 0.08 | Negative |
| MMP9       | rs17576    | 1520 vs. 1753 (4*) | 4  | 0.83 (0.66, 1.04) | 0.105 | 71 (9, 98)  | 0.017    | 0.71 | 4  | 0.84 (0.68, 1.04) | 0.108 | 0 (0, 91)   | 0.639    | 0.36 | 4  | 0.77 (0.56, 1.06) | 0.108 | 74 (21, 98) | 0.008    | 0.96 | Negative |
| ALDH2      | rs886205   | 2595 vs. 2993 (4*) | 4  | 1.01 (0.91, 1.12) | 0.898 | 0 (0, 88)   | 0.521    | 0.05 | 4  | 0.93 (0.68, 1.28) | 0.656 | 0 (0, 72)   | 0.880    | 0.07 | 4  | 1.02 (0.89, 1.16) | 0.780 | 15 (0, 92)  | 0.316    | 0.06 | Negative |
| VEGF       | rs833061   | 989 vs. 897 (4)    | 4  | 1.16 (0.77, 1.74) | 0.476 | 88 (66, 99) | 1.00E-05 | 0.36 | 4  | 1.27 (0.69, 2.34) | 0.444 | 83 (50, 99) | 0.001    | 0.52 | 4  | 1.18 (0.71, 1.94) | 0.525 | 82 (49, 99) | 0.001    | 0.39 | Negative |
| VEGF       | rs1570360  | 1150 vs. 1342 (4)  | 4  | 0.98 (0.87, 1.12) | 0.798 | 0 (0, 86)   | 0.741    | 0.06 | 4  | 0.98 (0.74, 1.29) | 0.869 | 0 (0, 82)   | 0.822    | 0.05 | 4  | 0.98 (0.83, 1.16) | 0.816 | 0 (0, 90)   | 0.700    | 0.06 | Negative |
| IL1B       | rs1143627  | 1251 vs. 2124 (5)  | 5  | 1.03 (0.93, 1.14) | 0.611 | 0 (0, 78)   | 0.782    | 0.07 | 5  | 1.02 (0.75, 1.40) | 0.881 | 50 (0, 96)  | 0.094    | 0.05 | 5  | 1.06 (0.92, 1.22) | 0.439 | 0 (0, 89)   | 0.690    | 0.13 | Negative |
| IL1B       | rs16944    | 577 vs. 828 (3)    | 3  | 0.96 (0.82, 1.13) | 0.626 | 0 (0, 96)   | 0.667    | 0.07 | 3  | 1.08 (0.78, 1.48) | 0.649 | 0 (0, 91)   | 0.773    | 0.08 | 3  | 0.82 (0.55, 1.24) | 0.352 | 63 (0, 100) | 0.067    | 0.44 | Negative |
| IL4        | rs2057768  | 1123 vs. 1483 (5)  | 5  | 0.94 (0.78, 1.13) | 0.529 | 32 (0, 96)  | 0.208    | 0.09 | 5  | 0.88 (0.59, 1.31) | 0.529 | 0 (0, 88)   | 0.577    | 0.09 | 5  | 0.94 (0.77, 1.15) | 0.556 | 25 (0, 95)  | 0.257    | 0.11 | Negative |
| IL4R       | rs1805012  | 3801 vs. 3962 (3*) | 3  | 1.05 (0.89, 1.24) | 0.566 | 49 (0, 99)  | 0.143    | 0.10 | 3  | 1.49 (0.99, 2.24) | 0.058 | 0 (0, 97)   | 0.494    | 0.56 | 3  | 1.02 (0.83, 1.25) | 0.874 | 57 (0, 99)  | 0.095    | 0.07 | Negative |
| IL4R       | rs1805015  | 3607 vs. 3692 (3*) | 3  | 1.02 (0.94, 1.12) | 0.599 | 0 (0, 96)   | 0.673    | 0.06 | 3  | 1.23 (0.94, 1.62) | 0.137 | 0 (0, 96)   | 0.643    | 0.34 | 3  | 1.00 (0.91, 1.11) | 0.962 | 0 (0, 98)   | 0.537    | 0.05 | Negative |
| IL4R       | rs1801275  | 1764 vs. 1747 (4*) | 4  | 0.94 (0.74, 1.19) | 0.589 | 67 (0, 99)  | 0.027    | 0.11 | 4  | 1.33 (0.93, 1.90) | 0.113 | 0 (0, 54)   | 0.931    | 0.39 | 4  | 0.88 (0.65, 1.18) | 0.394 | 71 (20, 99) | 0.015    | 0.43 | Negative |
| IL6        | rs1800797  | 2619 vs. 3396 (3)  | 2  | 1.00 (0.81, 1.23) | 0.981 | 0 (0, 100)  | 0.544    | 0.05 | 2  | 1.04 (0.72, 1.51) | 0.835 | 0 (0, 100)  | 0.631    | 0.09 | 3  | 0.96 (0.87, 1.07) | 0.472 | 0 (0, 90)   | 0.889    | 0.11 | Negative |

|              |            |                     |    |                   |       |              |          |      |    |                    |       |              |          |      |   |                   |       |              |          |      |          |
|--------------|------------|---------------------|----|-------------------|-------|--------------|----------|------|----|--------------------|-------|--------------|----------|------|---|-------------------|-------|--------------|----------|------|----------|
| IL6R         | rs8192284  | 3070 vs. 20173 (3)  | 3  | 0.97 (0.91, 1.04) | 0.437 | 0 (0, 96)    | 0.469    | 0.11 | 3  | 0.94 (0.82, 1.07)  | 0.363 | 0 (0, 92)    | 0.862    | 0.15 | 3 | 1.02 (0.87, 1.20) | 0.796 | 36 (0, 98)   | 0.208    | 0.08 | Negative |
| IL10         | rs1800872  | 1598 vs. 2760 (7)   | 7  | 1.23 (0.92, 1.64) | 0.163 | 86 (68, 97)  | 1.17E-07 | 0.08 | 7  | 1.57 (0.74, 3.33)  | 0.240 | 85 (66, 97)  | 5.44E-07 | 0.08 | 7 | 1.15 (0.92, 1.44) | 0.209 | 64 (14, 94)  | 0.011    | 0.09 | Negative |
| PTGS1/CO X1  | rs5788     | 4087 vs. 4808 (3)   | 3  | 1.02 (0.86, 1.21) | 0.856 | 75 (7, 99)   | 0.019    | 0.06 | 3  | 0.93 (0.68, 1.27)  | 0.640 | 0 (0, 95)    | 0.575    | 0.08 | 3 | 1.03 (0.84, 1.26) | 0.778 | 76 (13, 99)  | 0.015    | 0.09 | Negative |
| PTGS1/CO X1  | rs10306135 | 4644 vs. 6893 (3)   | 3  | 1.01 (0.94, 1.09) | 0.705 | 0 (0, 93)    | 0.661    | 0.05 | 3  | 0.96 (0.74, 1.24)  | 0.742 | 0 (0, 70)    | 0.919    | 0.06 | 3 | 1.02 (0.94, 1.11) | 0.595 | 0 (0, 93)    | 0.678    | 0.08 | Negative |
| PTGS1/CO X1  | rs6478565  | 4418 vs. 5909 (3*)  | 3  | 0.97 (0.89, 1.05) | 0.415 | 20 (0, 98)   | 0.288    | 0.09 | 3  | 0.94 (0.71, 1.26)  | 0.697 | 25 (0, 99)   | 0.264    | 0.08 | 3 | 0.95 (0.84, 1.09) | 0.478 | 55 (0, 99)   | 0.109    | 0.22 | Negative |
| PTGS2/CO X2  | rs4648261  | 4687 vs. 6951 (3)   | 2  | 1.05 (0.87, 1.27) | 0.640 | 0 (0, 93)    | 0.907    | 0.07 | 2  | 3.04 (0.76, 12.18) | 0.116 | 0 (0, 97)    | 0.859    | 0.70 | 3 | 0.92 (0.75, 1.13) | 0.434 | 37 (0, 98)   | 0.202    | 0.17 | Negative |
| PTGS2/CO X2  | rs2745557  | 4300 vs. 5825 (5)   | 5  | 1.05 (0.94, 1.19) | 0.373 | 48 (0, 96)   | 0.102    | 0.16 | 5  | 1.01 (0.84, 1.23)  | 0.885 | 0 (0, 83)    | 0.608    | 0.05 | 5 | 1.09 (0.92, 1.29) | 0.304 | 60 (0, 98)   | 0.039    | 0.53 | Negative |
| PTGS2/CO X2  | rs20424    | 3590 vs. 4927 (3)   | na | na                | na    | na           | na       | na   | na | na                 | na    | na           | na       | na   | 3 | 1.16 (0.90, 1.49) | 0.243 | 0 (0, 95)    | 0.839    | 0.28 | Negative |
| TNF-alpha    | rs361525   | 292 vs. 351 (4)     | 3  | 1.06 (0.11, 9.86) | 0.961 | 86 (44, 99)  | 0.001    | 0.24 | 4  | 1.01 (0.15, 6.67)  | 0.988 | 76 (11, 99)  | 0.016    | na   | 2 | 0.47 (0.11, 2.03) | 0.311 | 22 (0, 99)   | 0.257    | 0.42 | Negative |
| TNF-alpha    | rs1799724  | 845 vs. 832 (4)     | 4  | 0.97 (0.78, 1.20) | 0.775 | 4 (0, 93)    | 0.373    | 0.05 | 3  | 0.99 (0.45, 2.15)  | 0.972 | 0 (0, 99)    | 0.696    | 0.05 | 4 | 0.96 (0.75, 1.24) | 0.771 | 10 (0, 93)   | 0.344    | 0.06 | Negative |
| TNF-alpha    | rs1799964  | 1959 vs. 1948 (3§)  | 3  | 0.92 (0.83, 1.03) | 0.152 | 0 (0, 93)    | 0.544    | 0.18 | 3  | 0.83 (0.59, 1.17)  | 0.290 | 4 (0, 98)    | 0.353    | 0.21 | 3 | 0.92 (0.81, 1.05) | 0.213 | 0 (0, 89)    | 0.734    | 0.24 | Negative |
| TGFB1        | rs1800468  | 834 vs. 1579 (3)    | 3  | 0.90 (0.75, 1.09) | 0.276 | 0 (0, 91)    | 0.817    | 0.19 | 3  | 0.92 (0.65, 1.31)  | 0.643 | 0 (0, 92)    | 0.813    | 0.08 | 3 | 0.86 (0.66, 1.11) | 0.234 | 0 (0, 95)    | 0.629    | 0.42 | Negative |
| TGFB1        | rs1800470  | 998 vs. 1383 (4)    | 4  | 1.03 (0.70, 1.51) | 0.889 | 87 (76, 100) | 4.44E-05 | 0.06 | 3  | 1.29 (0.75, 2.21)  | 0.351 | 78 (29, 100) | 0.010    | 0.70 | 4 | 0.95 (0.57, 1.58) | 0.847 | 83 (60, 100) | 0.001    | 0.09 | Negative |
| TGFB1        | rs334354   | 1012 vs. 1923 (3)   | 3  | 1.06 (0.79, 1.40) | 0.711 | 78 (20, 99)  | 0.010    | 0.11 | 3  | 1.36 (0.94, 1.97)  | 0.103 | 29 (0, 98)   | 0.245    | 0.68 | 3 | 1.00 (0.68, 1.48) | 0.994 | 80 (25, 99)  | 0.006    | 0.05 | Negative |
| IGF1         | rs6214     | 1248 vs. 3005 (3*)  | 3  | 1.10 (0.95, 1.28) | 0.219 | 34 (0, 99)   | 0.217    | 0.29 | 3  | 1.08 (0.85, 1.38)  | 0.517 | 22 (0, 98)   | 0.278    | 0.14 | 3 | 1.16 (0.93, 1.44) | 0.181 | 33 (0, 99)   | 0.223    | 0.56 | Negative |
| IGFBP3       | rs2854746  | 4484 vs. 7577 (6)   | 6  | 0.99 (0.89, 1.09) | 0.798 | 61 (1, 97)   | 0.024    | 0.06 | 6  | 0.94 (0.83, 1.07)  | 0.337 | 38 (0, 95)   | 0.152    | 0.28 | 6 | 1.01 (0.93, 1.10) | 0.633 | 50 (0, 96)   | 0.075    | 0.06 | Negative |
| IGFBP3       | rs3110697  | 3079 vs. 3860 (3*)  | 3  | 0.96 (0.83, 1.11) | 0.603 | 67 (0, 100)  | 0.049    | 0.13 | 3  | 0.95 (0.78, 1.17)  | 0.644 | 52 (0, 99)   | 0.122    | 0.12 | 3 | 1.00 (0.88, 1.14) | 0.954 | 27 (0, 99)   | 0.255    | 0.05 | Negative |
| HFE          | rs1799945  | 1495 vs. 2038 (5)   | 5  | 1.12 (0.94, 1.34) | 0.199 | 32 (0, 93)   | 0.211    | 0.20 | 5  | 1.41 (0.84, 2.36)  | 0.191 | 14 (0, 91)   | 0.326    | 0.26 | 5 | 1.11 (0.93, 1.32) | 0.257 | 15 (0, 91)   | 0.318    | 0.26 | Negative |
| MTHFR        | rs2274976  | 2860 vs. 3414 (5*§) | 3  | 0.80 (0.53, 1.19) | 0.266 | 79 (73, 100) | 0.009    | 0.51 | 2  | 1.50 (0.27, 8.34)  | 0.641 | 59 (0, 99)   | 0.118    | 0.21 | 5 | 0.94 (0.84, 1.05) | 0.415 | 64 (0, 100)  | 0.027    | 0.12 | Negative |
| MTRR         | rs1532268  | 4457 vs. 5807 (4*)  | 4  | 0.98 (0.90, 1.06) | 0.587 | 38 (0, 96)   | 0.184    | 0.08 | 4  | 0.90 (0.77, 1.05)  | 0.192 | 34 (0, 96)   | 0.209    | 0.43 | 4 | 1.01 (0.91, 1.12) | 0.856 | 27 (0, 95)   | 0.251    | 0.06 | Negative |
| CYP1A1       | rs1799814  | 4389 vs. 4621 (4§)  | 4  | 0.89 (0.63, 1.26) | 0.513 | 76 (31, 99)  | 0.006    | 0.18 | 3  | 1.05 (0.25, 4.43)  | 0.944 | 41 (0, 99)   | 0.184    | 0.05 | 4 | 0.87 (0.60, 1.26) | 0.463 | 76 (34, 99)  | 0.006    | 0.41 | Negative |
| CYP1A2       | rs2470890  | 3638 vs. 3885 (4)   | 4  | 0.95 (0.84, 1.08) | 0.459 | 68 (3, 99)   | 0.023    | 0.19 | 4  | 0.89 (0.75, 1.05)  | 0.162 | 34 (0, 97)   | 0.209    | 0.46 | 4 | 0.96 (0.82, 1.13) | 0.637 | 61 (0, 99)   | 0.053    | 0.14 | Negative |
| CYP1A2       | rs2069514  | 1283 vs. 1305 (5)   | 5  | 1.00 (0.76, 1.32) | 0.989 | 39 (0, 99)   | 0.163    | 0.05 | 4  | 0.98 (0.69, 1.39)  | 0.913 | 0 (0, 91)    | 0.536    | 0.05 | 5 | 0.96 (0.65, 1.43) | 0.854 | 53 (0, 99)   | 0.075    | 0.08 | Negative |
| CYP1B1       | rs1056827  | 3153 vs. 3199 (4)   | 4  | 1.03 (0.90, 1.18) | 0.657 | 53 (0, 100)  | 0.093    | 0.11 | 4  | 1.12 (0.94, 1.33)  | 0.209 | 0 (0, 97)    | 0.536    | 0.27 | 4 | 1.02 (0.86, 1.20) | 0.857 | 50 (0, 100)  | 0.109    | 0.09 | Negative |
| CYP2C19      | rs4244285  | 3385 vs. 3498 (5)   | 5  | 0.91 (0.80, 1.04) | 0.160 | 34 (0, 97)   | 0.194    | 0.28 | 4  | 0.84 (0.60, 1.18)  | 0.304 | 0 (0, 84)    | 0.769    | 0.18 | 5 | 0.90 (0.77, 1.07) | 0.233 | 46 (0, 97)   | 0.119    | 0.49 | Negative |
| CYP2D6       | rs3892097  | 1153 vs. 1806 (4)   | 4  | 1.00 (0.87, 1.15) | 0.961 | 0 (0, 88)    | 0.694    | 0.05 | 4  | 1.05 (0.74, 1.48)  | 0.788 | 0 (0, 92)    | 0.492    | 0.06 | 4 | 0.99 (0.84, 1.16) | 0.869 | 0 (0, 66)    | 0.914    | 0.05 | Negative |
| CYP2E1       | rs6413432  | 3893 vs. 4643 (8)   | 8  | 0.88 (0.67, 1.16) | 0.353 | 84 (74, 98)  | 1.67E-07 | 0.05 | 7  | 0.83 (0.52, 1.30)  | 0.411 | 28 (0, 96)   | 0.218    | 0.12 | 7 | 0.85 (0.62, 1.16) | 0.303 | 85 (75, 98)  | 0.000    | 0.05 | Negative |
| GSTA1        | rs3957357  | 806 vs. 1103 (4)    | 4  | 1.10 (0.92, 1.32) | 0.306 | 43 (0, 96)   | 0.153    | 0.17 | 4  | 1.26 (0.90, 1.78)  | 0.178 | 45 (0, 96)   | 0.143    | 0.45 | 4 | 1.05 (0.84, 1.31) | 0.687 | 25 (0, 95)   | 0.262    | 0.08 | Negative |
| GSTM1        | rs1065411  | 828 vs. 873 (3)     | 3  | 1.04 (0.90, 1.21) | 0.594 | 0 (0, 96)    | 0.692    | 0.07 | 2  | 0.96 (0.78, 1.19)  | 0.721 | 0 (0, 99)    | 0.659    | 0.06 | 3 | 1.12 (0.91, 1.37) | 0.277 | 0 (0, 96)    | 0.706    | 0.20 | Negative |
| GSTM3        | rs1799735  | 3505 vs. 4180 (5)   | 5  | 0.98 (0.83, 1.15) | 0.782 | 66 (7, 97)   | 0.019    | 0.06 | 5  | 1.19 (0.79, 1.80)  | 0.406 | 43 (0, 97)   | 0.137    | 0.24 | 5 | 0.96 (0.80, 1.16) | 0.660 | 66 (6, 97)   | 0.019    | 0.13 | Negative |
| NAT1         | rs4986990  | 2253 vs. 2768 (3)   | 3  | 1.05 (0.81, 1.37) | 0.698 | 0 (0, 79)    | 0.923    | 0.06 | na | na                 | na    | na           | na       | na   | 3 | 1.05 (0.81, 1.37) | 0.694 | 0 (0, 80)    | 0.922    | 0.06 | Negative |
| NAT1         | rs1057126  | 2251 vs. 2747 (3)   | 3  | 1.00 (0.90, 1.10) | 0.937 | 0 (0, 95)    | 0.814    | 0.05 | 3  | 0.95 (0.70, 1.28)  | 0.734 | 22 (0, 99)   | 0.278    | 0.07 | 3 | 1.01 (0.90, 1.14) | 0.886 | 0 (0, 0)     | 0.998    | 0.05 | Negative |
| NAT2         | rs1799931  | 2510 vs. 3130 (5)   | 5  | 1.01 (0.83, 1.22) | 0.955 | 0 (0, 83)    | 0.609    | 0.05 | 2  | 0.70 (0.27, 1.81)  | 0.459 | 9 (0, 99)    | 0.295    | 0.54 | 5 | 1.04 (0.83, 1.29) | 0.756 | 0 (0, 70)    | 0.791    | 0.07 | Negative |
| NQO1         | rs1131341  | 4436 vs. 4725 (4)   | 4  | 0.99 (0.86, 1.15) | 0.914 | 0 (0, 92)    | 0.509    | 0.05 | 2  | 5.44 (0.94, 31.43) | 0.058 | 0 (0, 98)    | 0.604    | 1.00 | 4 | 0.97 (0.83, 1.13) | 0.699 | 0 (0, 93)    | 0.501    | 0.07 | Negative |
| VDR          | rs2238136  | 4584 vs. 4621 (5*)  | 5  | 1.04 (0.96, 1.13) | 0.342 | 20 (0, 91)   | 0.287    | 0.13 | 5  | 1.16 (0.90, 1.50)  | 0.258 | 50 (0, 95)   | 0.092    | 0.48 | 5 | 1.02 (0.94, 1.11) | 0.622 | 0 (0, 73)    | 0.767    | 0.08 | Negative |
| VDR          | rs7975232  | 3301 vs. 3402 (5)   | 5  | 1.11 (0.95, 1.30) | 0.193 | 70 (23, 98)  | 0.010    | 0.57 | 5  | 1.15 (0.92, 1.43)  | 0.225 | 53 (0, 98)   | 0.076    | 0.64 | 5 | 1.10 (0.90, 1.35) | 0.329 | 59 (0, 96)   | 0.047    | 0.43 | Negative |
| ABCB1 (MDR1) | rs2032582  | 1008 vs. 1100 (5)   | 5  | 1.07 (0.94, 1.21) | 0.314 | 0 (0, 90)    | 0.420    | 0.12 | 5  | 1.18 (0.98, 1.42)  | 0.075 | 1 (0, 89)    | 0.403    | 0.44 | 5 | 0.94 (0.74, 1.21) | 0.654 | 6 (0, 90)    | 0.370    | 0.07 | Negative |
| ABCB1 (MDR1) | rs868755   | 2958 vs. 3255 (3)   | 3  | 1.06 (0.99, 1.14) | 0.109 | 0 (0, 97)    | 0.393    | 0.21 | 3  | 1.04 (0.90, 1.20)  | 0.573 | 14 (0, 98)   | 0.312    | 0.09 | 3 | 1.09 (0.96, 1.24) | 0.166 | 25 (0, 98)   | 0.263    | 0.36 | Negative |
| ABCB1 (MDR1) | rs3789243  | 2724 vs. 3385 (4*§) | 4  | 1.03 (0.92, 1.14) | 0.625 | 46 (0, 97)   | 0.135    | 0.09 | 4  | 0.95 (0.84, 1.07)  | 0.398 | 0 (0, 87)    | 0.627    | 0.13 | 4 | 1.12 (0.93, 1.35) | 0.243 | 56 (0, 98)   | 0.080    | 0.48 | Negative |
| ACE          | I/D        | 649 vs. 6556 (4)    | 4  | 1.04 (0.91, 1.19) | 0.588 | 0 (0, 84)    | 0.758    | 0.05 | 4  | 1.17 (0.76, 1.80)  | 0.470 | 63 (0, 99)   | 0.043    | 0.11 | 4 | 1.08 (0.86, 1.36) | 0.490 | 0 (0, 76)    | 0.860    | 0.13 | Negative |
| ADIPOQ       | rs1501299  | 2221 vs. 3035 (8)   | 8  | 0.96 (0.87, 1.05) | 0.343 | 13 (0, 81)   | 0.325    | 0.10 | 8  | 1.03 (0.84, 1.26)  | 0.800 | 8 (0, 78)    | 0.366    | 0.06 | 8 | 0.92 (0.81, 1.05) | 0.227 | 22 (0, 82)   | 0.257    | 0.32 | Negative |
| ADIPOQ       | rs266729   | 2173 vs. 2582 (5)   | 5  | 0.92 (0.79, 1.07) | 0.269 | 64 (1, 97)   | 0.025    | 0.25 | 5  | 0.97 (0.79, 1.20)  | 0.781 | 0 (0, 93)    | 0.530    | 0.06 | 5 | 0.88 (0.72, 1.08) | 0.224 | 65 (5, 97)   | 0.021    | 0.59 | Negative |
| ADIPOR1      | rs7539542  | 1098 vs. 1301 (3)   | 3  | 1.01 (0.84, 1.21) | 0.950 | 53 (0, 98)   | 0.122    | 0.05 | 3  | 1.03 (0.74, 1.43)  | 0.861 | 66 (0, 99)   | 0.053    | 0.06 | 3 | 1.05 (0.85, 1.29) | 0.669 | 0 (0, 90)    | 0.733    | 0.07 | Negative |
| ALOX12       | rs1126667  | 3736 vs. 4610 (7*)  | 7  | 1.08 (0.93, 1.25) | 0.316 | 78 (61, 98)  | 1.15E-04 | 0.41 | 7  | 1.11 (0.92, 1.35)  | 0.268 | 53 (0, 93)   | 0.045    | 0.47 | 7 | 1.07 (0.86, 1.34) | 0.530 | 78 (66, 98)  | 1.10E-04 | 0.30 | Negative |

|             |            |                         |    |                   |       |             |          |      |    |                   |       |             |          |      |    |                   |       |             |          |      |          |
|-------------|------------|-------------------------|----|-------------------|-------|-------------|----------|------|----|-------------------|-------|-------------|----------|------|----|-------------------|-------|-------------|----------|------|----------|
| APE1        | rs1048945  | 3224 vs. 3369 (3)       | 3  | 0.89 (0.63, 1.25) | 0.495 | 41 (0, 99)  | 0.185    | 0.15 | 3  | 0.40 (0.08, 1.87) | 0.243 | 0 (0, 97)   | 0.380    | 0.25 | 3  | 0.90 (0.64, 1.26) | 0.533 | 39 (0, 99)  | 0.196    | 0.21 | Negative |
| ARLTS1      | rs3430134  | 1010 vs. 1862 (3)       | 3  | 0.98 (0.56, 1.71) | 0.947 | 0 (0, 87)   | 0.810    | 0.05 | na | na                | na    | na          | na       | na   | 3  | 0.98 (0.56, 1.71) | 0.947 | 0 (0, 87)   | 0.808    | 0.05 | Negative |
| ATM         | rs1801516  | 3477 vs. 6951 (3*)      | 3  | 0.99 (0.91, 1.09) | 0.885 | 0 (0, 98)   | 0.437    | 0.05 | 3  | 0.95 (0.70, 1.30) | 0.752 | 0 (0, 98)   | 0.418    | 0.07 | 3  | 1.00 (0.90, 1.11) | 0.989 | 0 (0, 98)   | 0.380    | 0.05 | Negative |
| BLM         | ASH        | 1741 vs. 11043 (3)      | 3  | 1.89 (0.75, 4.75) | 0.178 | 59 (0, 99)  | 0.087    | 1.00 | na | na                | na    | na          | na       | na   | 3  | 1.89 (0.75, 4.80) | 0.179 | 59 (0, 99)  | 0.085    | 0.84 | Negative |
| BMP4        | rs17563    | 3505 vs. 2518 (4)       | 4  | 0.95 (0.86, 1.06) | 0.368 | 40 (0, 96)  | 0.174    | 0.17 | 4  | 0.93 (0.83, 1.05) | 0.270 | 0 (0, 93)   | 0.412    | 0.25 | 4  | 0.94 (0.81, 1.10) | 0.465 | 25 (0, 95)  | 0.261    | 0.16 | Negative |
| CBS         | rs5742905  | 2197 vs. 2579 (7)       | 6  | 1.04 (0.87, 1.25) | 0.632 | 0 (0, 98)   | 0.530    | 0.06 | 4  | 0.88 (0.39, 2.01) | 0.770 | 0 (0, 60)   | 0.878    | 0.06 | 7  | 1.05 (0.87, 1.26) | 0.618 | 0 (0, 95)   | 0.620    | 0.09 | Negative |
| CDKN1A      | rs1059234  | 1036 vs. 1512 (3)       | 3  | 0.93 (0.81, 1.08) | 0.347 | 0 (0, 95)   | 0.545    | 0.13 | 3  | 0.97 (0.73, 1.30) | 0.843 | 0 (0, 99)   | 0.424    | 0.06 | 3  | 0.88 (0.72, 1.08) | 0.225 | 0 (0, 97)   | 0.444    | 0.35 | Negative |
| CDKN1A      | rs1801270  | 1038 vs. 1513 (3)       | 3  | 0.81 (0.57, 1.13) | 0.209 | 65 (0, 100) | 0.057    | 0.65 | 3  | 0.97 (0.40, 2.34) | 0.948 | 28 (0, 99)  | 0.250    | 0.06 | 3  | 0.76 (0.52, 1.12) | 0.167 | 61 (0, 100) | 0.075    | 0.93 | Negative |
|             |            |                         |    |                   |       |             |          |      |    |                   |       |             |          |      |    |                   |       |             |          |      |          |
| SMAD7       | rs4939827  | 43924 vs. 44264 (21*)   | 21 | 0.96 (0.90, 1.02) | 0.213 | 85 (81, 96) | 2.39E-19 | 0.96 | 21 | 0.95 (0.86, 1.05) | 0.306 | 81 (67, 95) | 1.36E-13 | 0.99 | 21 | 0.93 (0.86, 1.00) | 0.084 | 79 (73, 95) | 1.35E-11 | 1.00 | Null     |
| WRN         | rs2230009  | 7662 vs. 7908(4*)       | 4  | 0.94(0.85,1.03)   | 0.170 | 0(0,0)      | 0.984    | 0.15 | 4  | 0.76(0.48,1.23)   | 0.266 | 0(0,88)     | 0.483    | 0.17 | 4  | 0.94(0.86,1.04)   | 0.231 | 0(0,53)     | 0.926    | 0.24 | Null     |
| MTRR        | rs162036   | 6473 vs. 7859 (4*)      | 4  | 1.05 (0.93, 1.17) | 0.439 | 49 (0, 98)  | 0.116    | 0.15 | 4  | 1.18 (0.89, 1.58) | 0.248 | 0 (0, 95)   | 0.489    | 0.20 | 4  | 1.05 (0.94, 1.18) | 0.410 | 41 (0, 98)  | 0.168    | 0.22 | Null     |
| CDH1        | rs16260    | 7261 vs. 7230(10)       | 10 | 1.13(0.97,1.31)   | 0.105 | 78(63,95)   | 7.07E-06 | 0.12 | 10 | 1.03(0.81,1.32)   | 0.792 | 51(0,97)    | 0.030    | 0.13 | 10 | 1.20(0.99,1.44)   | 0.059 | 76(55,96)   | 1.94E-05 | 0.30 | Null     |
| ALDH2       | rs671      | 5561 vs. 8415(14)       | 14 | 1.03(0.87,1.23)   | 0.718 | 77(56,94)   | 2.92E-07 | 0.05 | 14 | 1.12(0.75,1.66)   | 0.584 | 72(32,88)   | 6.16E-05 | 0.05 | 14 | 1.01(0.84,1.21)   | 0.916 | 67(43,93)   | 1.78E-04 | 0.08 | Null     |
| MGMT        | rs12917    | 8296 vs. 11815(9*)      | 8  | 1.00(0.93,1.07)   | 0.988 | 2(0,85)     | 0.413    | 0.05 | 7  | 1.34(1,10.81)     | 0.051 | 23(0,93)    | 0.253    | 0.81 | 9  | 0.96(0.87,1.05)   | 0.350 | 33(0,94)    | 0.154    | 0.23 | Null     |
| OGG1        | rs1052133  | 8090 vs. 10486 (21)     | 21 | 1.09(0.99,1.19)   | 0.063 | 65(60,93)   | 2.00E-05 | 0.82 | 21 | 1.09(0.94,1.25)   | 0.257 | 36(0,93)    | 0.053    | 0.60 | 21 | 1.12(0.99,1.26)   | 0.072 | 65(52,91)   | 2.54E-05 | 0.87 | Null     |
| XRCC1       | rs1799782  | 7643 vs. 11883(25)      | 24 | 1.07(0.95,1.21)   | 0.265 | 64(48,89)   | 1.02E-05 | 0.53 | 22 | 1.13(0.91,1.40)   | 0.277 | 27(0,84)    | 0.124    | 0.36 | 25 | 1.07(0.94,1.21)   | 0.290 | 57(33,84)   | 2.33E-04 | 0.57 | Null     |
| XRCC1       | rs25489    | 6510 vs. 7889(10)       | 9  | 1.02(0.91,1.14)   | 0.723 | 0(0,71)     | 0.789    | 0.06 | 7  | 1.05(0.59,1.87)   | 0.869 | 0(0,73)     | 0.597    | 0.06 | 10 | 1.00(0.90,1.11)   | 0.963 | 0(0,75)     | 0.625    | 0.05 | Null     |
| XRCC3       | rs861539   | 7995 vs. 9886(21)       | 21 | 1.10(0.96,1.26)   | 0.169 | 85(79,97)   | 2.95E-19 | 0.43 | 21 | 1.1(0.92,1.31)    | 0.280 | 55(36,91)   | 0.001    | 0.12 | 21 | 1.10(0.92,1.31)   | 0.310 | 84(84,97)   | 3.19E-17 | 0.36 | Null     |
| IL6         | rs1800795  | 7858 vs. 9345(13\$**)   | 13 | 1.03(0.93,1.14)   | 0.572 | 74(70,96)   | 4.62E-06 | 0.05 | 13 | 1.01(0.88,1.17)   | 0.866 | 57(28,96)   | 0.006    | 0.08 | 13 | 1.04(0.92,1.17)   | 0.580 | 66(46,94)   | 4.33E-04 | 0.06 | Null     |
| IL8         | rs4073     | 6060 vs. 7435(12**)     | 11 | 1.04(0.96,1.14)   | 0.303 | 57(14,92)   | 0.010    | 0.20 | 11 | 1.05(0.95,1.17)   | 0.340 | 24(0,75)    | 0.215    | 0.21 | 12 | 1.07(0.93,1.22)   | 0.362 | 65(40,93)   | 0.001    | 0.43 | Null     |
| PPAR-gamma  | rs3856806  | 8098 vs. 11100(11*)     | 9  | 1.05(0.97,1.14)   | 0.193 | 20(0,84)    | 0.263    | 0.20 | 9  | 0.87(0.55,1.37)   | 0.549 | 60(13,92)   | 0.010    | 0.19 | 11 | 1.06(0.99,1.14)   | 0.073 | 0(0,68)     | 0.551    | 0.39 | Null     |
| PPAR-gamma  | rs1801282  | 15855 vs. 24348(22\$**) | 19 | 1.00(0.93,1.08)   | 0.978 | 48(5,90)    | 0.019    | 0.05 | 19 | 0.84(0.68,1.04)   | 0.102 | 0(0,57)     | 0.796    | 0.35 | 22 | 0.99(0.91,1.08)   | 0.870 | 49(18,88)   | 0.006    | 0.07 | Null     |
| PTGS2/CO X2 | rs689466   | 7790 vs. 11652(12)      | 12 | 0.95(0.84,1.08)   | 0.437 | 80(80,98)   | 8.22E-08 | 0.31 | 12 | 0.95(0.79,1.13)   | 0.549 | 28(0,85)    | 0.168    | 0.12 | 12 | 0.93(0.80,1.09)   | 0.380 | 81(81,98)   | 1.39E-08 | 0.68 | Null     |
| PTGS2/CO X2 | rs5275     | 12396 vs. 15884(13*)    | 13 | 1.01(0.97,1.04)   | 0.672 | 0(0,71)     | 0.482    | 0.07 | 13 | 1.02(0.94,1.11)   | 0.616 | 14(0,81)    | 0.301    | 0.08 | 13 | 1.01(0.96,1.06)   | 0.790 | 0(0,45)     | 0.791    | 0.07 | Null     |
| PTGS2/CO X2 | rs5277     | 5740 vs. 7509(7)        | 7  | 0.98(0.92,1.05)   | 0.620 | 0(0,75)     | 0.786    | 0.07 | 7  | 0.83(0.66,1.04)   | 0.106 | 0(0,82)     | 0.594    | 0.36 | 7  | 1.00(0.93,1.08)   | 0.974 | 0(0,65)     | 0.881    | 0.05 | Null     |
| TGFBR1      | rs11466445 | 6705 vs. 8162(12**)     | 12 | 1.13(0.99,1.30)   | 0.080 | 62(33,93)   | 0.003    | 0.59 | 12 | 1.12(0.74,1.71)   | 0.589 | 27(0,93)    | 0.184    | 0.09 | 12 | 1.12(0.99,1.28)   | 0.079 | 49(0,90)    | 0.029    | 0.73 | Null     |
| IGF1        | CA-repeat  | 9335 vs. 11089(9)       | 9  | 0.99(0.92,1.07)   | 0.866 | 62(32,96)   | 0.007    | 0.06 | 9  | 1.02(0.94,1.11)   | 0.642 | 8(0,82)     | 0.369    | 0.08 | 9  | 0.95(0.79,1.13)   | 0.550 | 86(88,99)   | 1.69E-09 | 0.43 | Null     |
| IGFBP3      | rs2854744  | 10880 vs. 15046(12)     | 12 | 1.01(0.97,1.05)   | 0.655 | 0(0,2)      | 0.973    | 0.07 | 12 | 1.02(0.96,1.08)   | 0.561 | 0(0,64)     | 0.651    | 0.10 | 12 | 1.00(0.95,1.07)   | 0.878 | 0(0,0)      | 0.995    | 0.05 | Null     |
| MTR         | rs1805087  | 18831 vs. 24357 (28*\$) | 28 | 0.95 (0.88, 1.04) | 0.279 | 78 (75, 93) | 1.55E-14 | 0.07 | 28 | 0.98 (0.85, 1.14) | 0.843 | 38 (0, 71)  | 0.024    | 0.07 | 27 | 0.98 (0.94, 1.02) | 0.424 | 0 (0, 46)   | 0.490    | 0.16 | Null     |
| MTRR        | rs1801394  | 10175 vs. 15506 (21)    | 21 | 1.04 (1.00, 1.09) | 0.077 | 28 (0, 73)  | 0.114    | 0.47 | 21 | 1.06 (0.99, 1.14) | 0.091 | 18 (0, 80)  | 0.230    | 0.50 | 21 | 1.05 (0.97, 1.14) | 0.193 | 37(0, 74)   | 0.048    | 0.49 | Null     |
| TS          | rs34743033 | 5860 vs. 7540 (11)      | 11 | 0.96 (0.87, 1.05) | 0.378 | 57 (16, 92) | 0.010    | 0.20 | 11 | 0.93 (0.83, 1.04) | 0.203 | 10 (0, 87)  | 0.351    | 0.29 | 11 | 0.96 (0.84, 1.10) | 0.540 | 60 (19, 92) | 0.005    | 0.21 | Null     |
| TS          | rs34489327 | 5786 vs. 6856 (8)       | 8  | 0.99 (0.94, 1.05) | 0.839 | 12 (0, 86)  | 0.334    | 0.06 | 8  | 0.95 (0.82, 1.10) | 0.499 | 32 (0, 87)  | 0.172    | 0.14 | 8  | 1.00 (0.93, 1.07) | 0.985 | 0 (0, 83)   | 0.442    | 0.05 | Null     |
| APC         | rs1801166  | 7161 vs. 8140 (7)       | 7  | 1.27 (0.89, 1.82) | 0.191 | 31 (0, 95)  | 0.195    | 0.35 | na | na                | na    | na          | na       | na   | 7  | 1.27 (0.88, 1.83) | 0.200 | 31 (0, 95)  | 0.188    | 0.59 | Null     |
| APC         | rs459552   | 21929 vs. 20943 (22**)  | 22 | 1.00 (0.94, 1.07) | 0.943 | 69 (65, 93) | 8.56E-07 | 0.05 | 22 | 1.02 (0.86, 1.21) | 0.835 | 69 (56, 90) | 9.74E-07 | 0.07 | 22 | 0.99 (0.94, 1.05) | 0.701 | 42 (3, 85)  | 0.022    | 0.08 | Null     |
| MLH1        | rs1799977  | 15398 vs. 16730 (20*)   | 19 | 0.99 (0.94, 1.05) | 0.846 | 50 (17, 94) | 0.008    | 0.07 | 19 | 0.96 (0.89, 1.04) | 0.332 | 4 (0, 80)   | 0.410    | 0.19 | 20 | 1.01 (0.94, 1.08) | 0.811 | 43 (1, 90)  | 0.023    | 0.07 | Null     |
| MLH1        | rs1800734  | 21837 vs. 18831 (15*\$) | 15 | 1.04 (0.99, 1.09) | 0.082 | 30 (0, 92)  | 0.131    | 0.38 | 15 | 1.06 (0.94, 1.19) | 0.381 | 26 (0, 91)  | 0.166    | 0.24 | 15 | 1.05 (0.99, 1.12) | 0.126 | 38 (0, 96)  | 0.065    | 0.67 | Null     |
| CYP1A1      | rs4646903  | 9725 vs. 12104 (20)     | 20 | 0.95(0.87, 1.04)  | 0.282 | 49 (27, 94) | 0.007    | 0.08 | 19 | 0.79 (0.61, 1.03) | 0.078 | 50 (17, 90) | 0.007    | 0.41 | 20 | 0.97 (0.88, 1.06) | 0.448 | 37 (0, 92)  | 0.049    | 0.10 | Null     |
| CYP1A2      | rs762551   | 9669 vs. 10852 (16)     | 16 | 1.01 (0.95, 1.07) | 0.835 | 40 (0, 90)  | 0.052    | 0.06 | 16 | 0.99 (0.90, 1.09) | 0.849 | 0 (0, 62)   | 0.599    | 0.06 | 16 | 1.01(0.93, 1.10)  | 0.819 | 46 (4, 94)  | 0.023    | 0.06 | Null     |
| CYP1B1      | rs1056836  | 10318 vs. 11251 (12)    | 12 | 1.01 (0.98, 1.05) | 0.456 | 0 (0, 59)   | 0.721    | 0.07 | 12 | 1.06 (0.98, 1.14) | 0.140 | 13(0, 84)   | 0.319    | 0.41 | 12 | 0.99 (0.93, 1.05) | 0.740 | 0 (0, 59)   | 0.790    | 0.06 | Null     |
| CYP2C9      | rs1057910  | 15444 vs. 17426 (13*)   | 13 | 0.99 (0.91, 1.08) | 0.803 | 48 (0, 95)  | 0.028    | 0.06 | 11 | 0.75 (0.54, 1.06) | 0.107 | 28 (0, 89)  | 0.176    | 0.58 | 13 | 1.01 (0.92, 1.10) | 0.902 | 47 (0, 95)  | 0.031    | 0.06 | Null     |
| CYP2E1      | rs2031920  | 5216 vs. 6026 (11\$)    | 11 | 1.10 (0.95, 1.28) | 0.210 | 53 (3, 88)  | 0.020    | 0.36 | 10 | 1.42 (1.00, 2.03) | 0.052 | 32 (0, 92)  | 0.149    | 0.60 | 11 | 1.05 (0.91, 1.22) | 0.500 | 39 (0, 86)  | 0.091    | 0.19 | Null     |
| CYP2E1      | rs3813867  | 5035 vs. 6688 (10)      | 10 | 0.99 (0.75, 1.31) | 0.947 | 82 (65, 95) | 1.45E-07 | 0.45 | 8  | 1.38 (0.94, 2.03) | 0.100 | 0 (0, 90)   | 0.527    | 0.38 | 10 | 0.98 (0.72, 1.33) | 0.874 | 81 (62, 95) | 2.43E-07 | 0.70 | Null     |
| GSTP1       | rs1695     | 16373 vs. 20872 (38*)   | 38 | 0.99 (0.94, 1.05) | 0.806 | 50 (39, 84) | 2.49E-04 | 0.05 | 38 | 0.95 (0.85, 1.06) | 0.371 | 38 (10, 90) | 0.012    | 0.36 | 38 | 1.02 (0.94, 1.09) | 0.673 | 54 (50, 89) | 3.69E-05 | 0.16 | Null     |
| GSTP1       | rs1138272  | 12144 vs. 12586         | 13 | 0.98 (0.90, 1.07) | 0.616 | 37 (0, 93)  | 0.084    | 0.07 | 13 | 0.82 (0.62, 1.09) | 0.182 | 12 (0, 85)  | 0.327    | 0.26 | 13 | 0.99 (0.91, 1.08) | 0.814 | 22 (0, 90)  | 0.223    | 0.06 | Null     |

|              |            |                        |    |                   |       |             |          |      |    |                   |       |             |          |      |    |                   |       |             |          |      |      |
|--------------|------------|------------------------|----|-------------------|-------|-------------|----------|------|----|-------------------|-------|-------------|----------|------|----|-------------------|-------|-------------|----------|------|------|
|              |            | (13*§)                 |    |                   |       |             |          |      |    |                   |       |             |          |      |    |                   |       |             |          |      |      |
| NAT2         | slow/rapid | 8057 vs. 10431 (45)    | 19 | 1.02 (0.91, 1.14) | 0.789 | 79 (59, 92) | 3.91E-11 | 0.10 | 19 | 1.01 (0.88, 1.15) | 0.912 | 47 (10, 88) | 0.012    | 0.06 | 19 | 1.00 (0.85, 1.17) | 0.988 | 79 (42, 87) | 7.53E-11 | 0.05 | Null |
| CX3CR1       | rs3732378  | 6110 vs. 6335(4*)      | 4  | 1.01(0.93,1.09)   | 0.841 | 16(0,99)    | 0.310    | 0.06 | 4  | 1.06(0.87,1.30)   | 0.569 | 0(0,53)     | 0.850    | 0.09 | 4  | 1.00(0.90,1.12)   | 0.977 | 36(0,99)    | 0.195    | 0.05 | Null |
| EPHX1        | rs1051740  | 11718 vs. 13560(19*)   | 19 | 1.03(0.98,1.09)   | 0.250 | 43(0,86)    | 0.026    | 0.19 | 19 | 1.09(0.95,1.25)   | 0.224 | 53(23,88)   | 0.004    | 0.53 | 19 | 1.03(0.96,1.10)   | 0.385 | 39(0,88)    | 0.041    | 0.21 | Null |
| EPHX1        | rs2234922  | 6570 vs. 7960(14*)     | 14 | 0.97(0.90,1.05)   | 0.464 | 31(0,86)    | 0.124    | 0.11 | 14 | 1.12(0.89,1.42)   | 0.325 | 35(0,81)    | 0.093    | 0.33 | 14 | 0.95(0.88,1.02)   | 0.146 | 7(0,79)     | 0.358    | 0.40 | Null |
| ERCC2        | rs1799793  | 6722 vs. 9585(11)      | 9  | 1.14(0.98,1.33)   | 0.092 | 85(61,95)   | 6.91E-09 | 0.98 | 9  | 1.44(0.95,2.18)   | 0.083 | 92(76,97)   | 6.36E-19 | 1.00 | 11 | 1.02(0.96,1.09)   | 0.506 | 0(0,52)     | 0.781    | 0.10 | Null |
| ERCC2        | rs13181    | 10239 vs. 13833(24*)   | 24 | 1.00(0.93,1.08)   | 0.948 | 57(54,92)   | 4.55E-04 | 0.07 | 24 | 0.97(0.83,1.14)   | 0.730 | 59(60,94)   | 1.99E-04 | 0.06 | 24 | 1.01(0.95,1.08)   | 0.705 | 15(0,76)    | 0.250    | 0.12 | Null |
| ERCC4        | rs1800067  | 6896 vs. 7431(8*)      | 8  | 0.98(0.89,1.07)   | 0.617 | 0(0,95)     | 0.609    | 0.06 | 7  | 0.71(0.44,1.12)   | 0.139 | 0(0,91)     | 0.560    | 0.30 | 8  | 0.99(0.90,1.09)   | 0.869 | 0(0,94)     | 0.618    | 0.06 | Null |
| ESR1         | rs9340799  | 5043 vs. 6090(7)       | 7  | 0.98(0.93,1.04)   | 0.525 | 0(0,90)     | 0.540    | 0.08 | 7  | 0.97(0.85,1.11)   | 0.673 | 10(0,94)    | 0.356    | 0.08 | 7  | 0.99(0.89,1.10)   | 0.843 | 23(0,97)    | 0.252    | 0.06 | Null |
| EXO1         | rs4149963  | 6597 vs. 6842(5*)      | 5  | 1.07(0.89,1.29)   | 0.485 | 69(34,99)   | 0.012    | 0.19 | 5  | 0.90(0.49,1.63)   | 0.719 | 34(0,98)    | 0.196    | 0.08 | 5  | 1.06(0.89,1.26)   | 0.505 | 59(0,99)    | 0.047    | 0.24 | Null |
| EXO1         | rs9350     | 5459 vs. 5926(4*)      | 4  | 0.94(0.80,1.09)   | 0.409 | 65(0,99)    | 0.035    | 0.23 | 4  | 0.81(0.52,1.26)   | 0.348 | 64(0,99)    | 0.039    | 0.42 | 4  | 0.99(0.88,1.12)   | 0.911 | 32(0,99)    | 0.220    | 0.06 | Null |
| HIF1A        | rs11549465 | 6036 vs. 8066(5*)      | 5  | 0.99(0.83,1.18)   | 0.875 | 59(0,100)   | 0.089    | 0.05 | 2  | 1.22(0.82,1.81)   | 0.337 | 18(0,100)   | 0.271    | 0.22 | 3  | 1.06(0.85,1.31)   | 0.605 | 66(18,100)  | 0.020    | 0.27 | Null |
| ICAM1        | rs5498     | 6391 vs. 6611(6*)      | 6  | 0.94(0.83,1.07)   | 0.354 | 74(57,99)   | 0.002    | 0.09 | 6  | 1.00(0.86,1.17)   | 0.960 | 41(0,98)    | 0.132    | 0.07 | 6  | 0.89(0.75,1.06)   | 0.184 | 67(25,98)   | 0.009    | 0.28 | Null |
| IRS          | rs1801278  | 9726 vs. 10756(9**)    | 8  | 1.04(0.93,1.17)   | 0.476 | 38(0,89)    | 0.126    | 0.23 | 8  | 1.04(0.69,1.58)   | 0.840 | 0(0,0)      | 0.985    | 0.05 | 9  | 1.07(0.96,1.20)   | 0.227 | 43(0,89)    | 0.079    | 0.66 | Null |
| MBL2         | rs1800450  | 6362 vs. 6511(5*)      | 5  | 1.04(0.95,1.15)   | 0.373 | 23(0,99)    | 0.266    | 0.12 | 4  | 1.27(0.78,2.06)   | 0.333 | 57(0,95)    | 0.070    | 0.48 | 5  | 1.02(0.90,1.16)   | 0.745 | 36(0,99)    | 0.181    | 0.08 | Null |
| miR          | rs2910164  | 5127 vs. 4110(8)       | 8  | 0.80(0.47,1.36)   | 0.413 | 98(95,99)   | 3.01E-89 | 1.00 | 8  | 0.81(0.49,1.35)   | 0.427 | 94(87,99)   | 1.45E-23 | 0.83 | 8  | 0.75(0.36,1.57)   | 0.451 | 98(92,99)   | 1.34E-67 | 1.00 | Null |
| MSH6         | rs1800932  | 12214 vs. 10598(9)     | 9  | 0.96(0.90,1.03)   | 0.277 | 46(0,92)    | 0.064    | 0.22 | 9  | 0.88(0.75,1.02)   | 0.080 | 3(0,86)     | 0.411    | 0.40 | 9  | 0.97(0.89,1.05)   | 0.439 | 47(0,91)    | 0.056    | 0.19 | Null |
| MSH6         | rs1800935  | 14234 vs. 12089(11*)   | 11 | 0.97(0.94,1.01)   | 0.139 | 1(0,76)     | 0.435    | 0.20 | 11 | 0.97(0.89,1.06)   | 0.556 | 4(0,82)     | 0.405    | 0.11 | 11 | 0.96(0.91,1.02)   | 0.209 | 24(0,77)    | 0.216    | 0.38 | Null |
| MTHFD1       | rs2236225  | 11673 vs. 15250(10*)   | 10 | 1.00(0.96,1.03)   | 0.847 | 0(0,75)     | 0.559    | 0.05 | 10 | 0.98(0.93,1.04)   | 0.571 | 0(0,74)     | 0.531    | 0.10 | 10 | 1.01(0.95,1.06)   | 0.833 | 0(0,65)     | 0.609    | 0.07 | Null |
| PLA2G2A      | rs11677    | 5887 vs. 6774(4*)      | 4  | 0.96(0.86,1.07)   | 0.460 | 48(0,96)    | 0.125    | 0.11 | 4  | 0.85(0.63,1.15)   | 0.291 | 0(0,92)     | 0.602    | 0.18 | 4  | 0.96(0.85,1.08)   | 0.519 | 45(0,96)    | 0.144    | 0.16 | Null |
| 15q13.3      | rs4779584  | 6994 vs. 7280(7*)      | 7  | 1.05(0.94,1.17)   | 0.398 | 69(30,96)   | 0.003    | 0.30 | 7  | 1.07(0.98,1.17)   | 0.146 | 0(0,98)     | 0.461    | 0.36 | 7  | 1.02(0.86,1.21)   | 0.804 | 72(30,94)   | 0.001    | 0.09 | Null |
| SHBG         | rs6259     | 6312 vs. 6820(5*)      | 5  | 0.87(0.61,1.25)   | 0.454 | 95(78,99)   | 2.08E-17 | 0.81 | 5  | 0.84(0.20,3.51)   | 0.816 | 95(78,99)   | 2.58E-18 | 0.32 | 5  | 0.90(0.72,1.12)   | 0.348 | 84(43,97)   | 6.56E-05 | 0.77 | Null |
| TCF7L2       | rs7903146  | 5059 vs. 21289(6*)     | 6  | 1.07(0.96,1.18)   | 0.210 | 59(0,95)    | 0.032    | 0.37 | 6  | 1.11(0.93,1.33)   | 0.259 | 33(0,95)    | 0.192    | 0.30 | 6  | 1.06(0.94,1.20)   | 0.319 | 54(0,92)    | 0.056    | 0.33 | Null |
| UGT1A6       | rs1105879  | 7334 vs. 7774(5*)      | 5  | 1.01(0.97,1.06)   | 0.598 | 2(0,79)     | 0.397    | 0.06 | 5  | 1.03(0.93,1.14)   | 0.565 | 0(0,92)     | 0.459    | 0.09 | 5  | 1.01(0.93,1.09)   | 0.874 | 23(0,90)    | 0.269    | 0.06 | Null |
| WRN          | rs1346044  | 8548 vs. 8816(5*)      | 5  | 1.02(0.95,1.08)   | 0.644 | 35(0,96)    | 0.185    | 0.09 | 5  | 0.91(0.70,1.18)   | 0.478 | 72(48,99)   | 0.006    | 0.31 | 5  | 1.04(0.98,1.10)   | 0.212 | 0(0,89)     | 0.467    | 0.25 | Null |
| XPC          | rs2228001  | 7650 vs. 9769(13*)     | 13 | 1.03(0.96,1.11)   | 0.361 | 46(0,89)    | 0.036    | 0.16 | 13 | 1.01(0.90,1.14)   | 0.861 | 32(0,89)    | 0.125    | 0.06 | 13 | 1.06(0.95,1.18)   | 0.300 | 58(19,88)   | 0.005    | 0.45 | Null |
| MUTYH        | rs3219484  | 16671 vs. 14985 (13*)  | 13 | 1.03 (0.97, 1.09) | 0.419 | 0 (0, 52)   | 0.611    | 0.10 | 12 | 0.87 (0.63, 1.20) | 0.394 | 0 (0, 63)   | 0.771    | 0.14 | 13 | 1.03 (0.97, 1.10) | 0.294 | 0 (0, 47)   | 0.682    | 0.15 | Null |
| MUTYH        | rs3219489  | 17936 vs. 19154 (20)   | 20 | 1.04 (0.98, 1.10) | 0.186 | 60 (53, 95) | 3.28E-04 | 0.38 | 20 | 1.09 (0.97, 1.22) | 0.164 | 41 (0, 84)  | 0.028    | 0.54 | 20 | 1.03 (0.97, 1.11) | 0.331 | 53 (42, 96) | 0.003    | 0.29 | Null |
| XRCC2        | rs3218536  | 5977 vs. 6174 (4*)     | 4  | 1.07 (0.96, 1.20) | 0.228 | 22 (0, 99)  | 0.280    | 0.18 | 4  | 0.81 (0.45, 1.47) | 0.485 | 40 (0, 98)  | 0.169    | 0.14 | 4  | 1.09 (0.99, 1.20) | 0.080 | 0 (0, 98)   | 0.545    | 0.41 | Null |
| IL16         | rs4072111  | 6160 vs. 6643 (4*)     | 4  | 1.04 (0.95, 1.14) | 0.369 | 15 (0, 98)  | 0.315    | 0.11 | 4  | 1.15 (0.82, 1.61) | 0.423 | 16 (0, 97)  | 0.313    | 0.16 | 4  | 1.04 (0.95, 1.13) | 0.422 | 7 (0, 98)   | 0.360    | 0.16 | Null |
| PTGS1/CO X1  | rs5789     | 8164 vs. 10969 (6*)    | 3  | 1.02 (0.86, 1.21) | 0.856 | 75 (7, 99)  | 0.019    | 0.07 | 3  | 0.93 (0.68, 1.27) | 0.640 | 0 (0, 95)   | 0.575    | 0.07 | 3  | 1.03 (0.84, 1.26) | 0.778 | 76 (13, 99) | 0.015    | 0.12 | Null |
| PTGS1/CO X1  | rs1236913  | 9511 vs. 11189 (6*)    | 4  | 0.99 (0.90, 1.08) | 0.790 | 0 (0, 88)   | 0.582    | 0.05 | 4  | 0.84 (0.46, 1.54) | 0.582 | 25 (0, 98)  | 0.259    | 0.13 | 6  | 1.01 (0.93, 1.09) | 0.884 | 0 (0, 79)   | 0.649    | 0.06 | Null |
| PTGS2/CO X2  | rs2206593  | 5391 vs. 6096 (3*)     | 3  | 0.94 (0.81, 1.10) | 0.458 | 51 (0, 100) | 0.131    | 0.19 | 3  | 1.01 (0.77, 1.31) | 0.963 | 0 (0, 99)   | 0.577    | 0.05 | 3  | 0.95 (0.82, 1.10) | 0.470 | 44 (0, 100) | 0.170    | 0.21 | Null |
| IGFBP1       | rs4619     | 6537 vs. 6826 (4*)     | 4  | 1.03 (0.98, 1.08) | 0.299 | 0 (0, 88)   | 0.768    | 0.13 | 4  | 1.06 (0.96, 1.17) | 0.265 | 0 (0, 0)    | 0.977    | 0.21 | 4  | 1.02 (0.96, 1.10) | 0.503 | 0 (0, 92)   | 0.662    | 0.09 | Null |
| MTRR         | rs10380    | 9022 vs. 10910 (7*)    | 6  | 1.05 (0.96, 1.14) | 0.327 | 30 (0, 95)  | 0.207    | 0.18 | 6  | 1.38 (1.04, 1.82) | 0.025 | 0 (0, 90)   | 0.560    | 0.69 | 7  | 1.05 (0.96, 1.15) | 0.327 | 30 (0, 92)  | 0.199    | 0.27 | Null |
| MLH1         | rs3774332  | 7556 vs. 7299 (4*)     | 4  | 1.00 (0.88, 1.14) | 0.967 | 50 (0, 97)  | 0.110    | 0.05 | 4  | 0.99 (0.66, 1.49) | 0.969 | 14 (0, 93)  | 0.322    | 0.05 | 4  | 1.01 (0.89, 1.13) | 0.930 | 38 (0, 96)  | 0.187    | 0.06 | Null |
| CYP1B1       | rs10012    | 5336 vs. 5850 (6)      | 6  | 1.00 (0.94, 1.07) | 0.917 | 20 (0, 95)  | 0.285    | 0.05 | 6  | 1.04 (0.86, 1.25) | 0.698 | 43 (0, 97)  | 0.115    | 0.09 | 6  | 0.99 (0.92, 1.07) | 0.855 | 0 (0, 83)   | 0.787    | 0.06 | Null |
| CYP1B1       | rs1800440  | 11152 vs. 11918 (9*)   | 9  | 0.99 (0.92, 1.07) | 0.860 | 49 (0, 91)  | 0.047    | 0.06 | 9  | 0.95 (0.82, 1.10) | 0.490 | 0 (0, 53)   | 0.723    | 0.10 | 9  | 1.01 (0.91, 1.11) | 0.893 | 62 (20, 94) | 0.007    | 0.07 | Null |
| CYP17A1      | rs743572   | 5009 vs. 5163 (3)      | 3  | 1.04 (0.95, 1.13) | 0.407 | 50 (0, 99)  | 0.133    | 0.16 | 3  | 0.96 (0.87, 1.07) | 0.509 | 0 (0, 98)   | 0.492    | 0.12 | 3  | 1.10 (0.96, 1.25) | 0.170 | 57 (0, 99)  | 0.100    | 0.63 | Null |
| CYP3A4       | rs11773597 | 5005 vs. 5155 (3)      | 3  | 0.99 (0.89, 1.10) | 0.843 | 0 (0, 41)   | 0.955    | 0.05 | 3  | 0.89 (0.47, 1.68) | 0.715 | 0 (0, 97)   | 0.619    | 0.07 | 3  | 0.99 (0.88, 1.11) | 0.889 | 0 (0, 77)   | 0.899    | 0.05 | Null |
| CYP3A4       | rs2740574  | 5138 vs. 5295 (4)      | 4  | 0.92 (0.80, 1.06) | 0.236 | 0 (0, 86)   | 0.767    | 0.13 | 4  | 0.47 (0.19, 1.14) | 0.095 | 5 (0, 97)   | 0.367    | 0.29 | 4  | 0.94 (0.82, 1.09) | 0.451 | 0 (0, 21)   | 0.961    | 0.14 | Null |
| VDR          | rs2228570  | 16386 vs. 18814 (17**) | 17 | 0.99 (0.94, 1.05) | 0.702 | 59 (35, 93) | 0.001    | 0.08 | 17 | 0.98 (0.90, 1.08) | 0.706 | 45 (0, 94)  | 0.025    | 0.11 | 17 | 0.98 (0.90, 1.07) | 0.685 | 61 (47, 96) | 0.001    | 0.15 | Null |
| ABCB1 (MDR1) | rs2229109  | 6143 vs. 6104 (5§)     | 5  | 0.92 (0.82, 1.03) | 0.156 | 0 (0, 84)   | 0.673    | 0.17 | 5  | 1.39 (0.56, 3.43) | 0.474 | 0 (0, 87)   | 0.657    | 0.19 | 5  | 0.91 (0.80, 1.03) | 0.119 | 0 (0, 82)   | 0.713    | 0.34 | Null |
| ABCB1 (MDR1) | rs2214102  | 7865 vs. 7919 (5*)     | 5  | 1.07 (0.98, 1.17) | 0.116 | 9 (0, 84)   | 0.358    | 0.22 | 5  | 1.07 (0.66, 1.73) | 0.794 | 36 (0, 90)  | 0.181    | 0.06 | 5  | 1.08 (0.99, 1.18) | 0.092 | 0 (0, 80)   | 0.548    | 0.42 | Null |
| APE1         | rs1130409  | 5786 vs. 6550 (11)     | 11 | 1.08 (0.94, 1.22) | 0.277 | 80 (79, 98) | 3.27E-07 | 0.52 | 11 | 1.07 (0.87, 1.32) | 0.522 | 74 (72, 98) | 4.07E-   | 0.18 | 11 | 1.11 (0.92,       |       |             |          |      |      |

|                |           |                     |    |                   |       |             |       |      |    |                   |       |            |       |      |    |                   |       |            |       |      |      |
|----------------|-----------|---------------------|----|-------------------|-------|-------------|-------|------|----|-------------------|-------|------------|-------|------|----|-------------------|-------|------------|-------|------|------|
|                |           |                     |    |                   |       |             |       |      |    |                   |       |            | 05    |      |    |                   |       |            |       |      |      |
| AURKA          | rs2273535 | 5221 vs. 4806 (5)   | 5  | 1.07 (0.94, 1.23) | 0.309 | 68 (19, 98) | 0.014 | 0.31 | 5  | 1.19 (0.87, 1.64) | 0.274 | 67 (6, 97) | 0.018 | 0.56 | 5  | 1.03 (0.92, 1.15) | 0.617 | 25 (0, 97) | 0.254 | 0.11 | Null |
| CASP8          | rs3834129 | 7023 vs. 10751 (12) | 12 | 0.98 (0.91, 1.06) | 0.654 | 45 (0, 83)  | 0.046 | 0.06 | 12 | 1.04 (0.91, 1.20) | 0.570 | 41 (0, 87) | 0.066 | 0.30 | 12 | 0.93 (0.86, 1.01) | 0.083 | 10 (0, 66) | 0.352 | 0.49 | Null |
| CASR           | rs1801725 | 6000 vs. 6425 (4*)  | 4  | 1.05 (0.95, 1.17) | 0.325 | 41 (0, 98)  | 0.163 | 0.15 | 4  | 1.27 (0.82, 1.96) | 0.292 | 56 (0, 99) | 0.079 | 0.45 | 4  | 1.03 (0.95, 1.11) | 0.527 | 0 (0, 96)  | 0.483 | 0.11 | Null |
| CASR           | rs1042636 | 9265 vs. 10905 (5*) | 5  | 1.01 (0.94, 1.08) | 0.887 | 0 (0, 65)   | 0.810 | 0.06 | 5  | 1.04 (0.78, 1.40) | 0.776 | 0 (0, 97)  | 0.413 | 0.06 | 5  | 1.00 (0.93, 1.08) | 0.959 | 0 (0, 61)  | 0.834 | 0.05 | Null |
| COMT           | rs4680    | 9830 vs. 10176 (7*) | 7  | 0.99 (0.94, 1.05) | 0.845 | 42 (0, 94)  | 0.114 | 0.07 | 7  | 0.99 (0.91, 1.07) | 0.724 | 25 (0, 92) | 0.240 | 0.06 | 7  | 0.98 (0.91, 1.06) | 0.579 | 19 (0, 91) | 0.282 | 0.10 | Null |
| PTGS1/CO<br>X1 | rs3842787 | 5754 vs. 7916 (4)   | 3  | 1.01 (0.88, 1.16) | 0.838 | 4 (0, 99)   | 0.352 | 0.05 | 2  | 0.85 (0.42, 1.70) | 0.638 | 0 (0, 100) | 0.347 | 0.08 | 4  | 1.09 (0.95, 1.24) | 0.240 | 23 (0, 97) | 0.274 | 0.33 | Null |

\* Includes GWAS data from SOCCS

§ Includes GWAS data from Ontario

\*\* Tomlinson 2008 was based on 10 samples
